# Supplementary material
Source: PubMed Central journal article supplement (PMC6326532)

# Supporting Information

## Photoinitiated Three Component $\alpha$ -Perfluoroalkyl- $\beta$ -Heteroarylation of Unactivated Alkenes via Electron Catalysis

Danqing Zheng and Armido Studer\*

*Institute of Organic Chemistry, University of Münster, Corrensstrasse 40, 48149  
Münster, Germany*

*E-mail: studer@uni-muenster.de*

1. General experimental methods (S2)
2. General experimental procedure (S2-S3)
3. UV/Vis absorption spectra and characterization data (S3-S31)
4.  $^1\text{H}$ ,  $^{19}\text{F}$  and  $^{13}\text{C}$  NMR spectra of compounds **4**, **6**, **8**, **9** (S32 –S104)

## 1. General Experimental Methods

All reactions involving air- or moisture-sensitive reagents or intermediates were carried out in pre-heated glassware under an argon atmosphere using standard *Schlenk* techniques. All commercially available reagents were purchased from TCI, Sigma-Aldrich, Alfa Aesar, Acros or ABCR in the highest purity grade and used directly without further purification. Thin layer chromatography (TLC) was performed on Merck silica gel 60 F-254 plates and visualized by fluorescence quenching under UV light or staining with the standard solution of  $\text{KMnO}_4$ . Column chromatography was performed on Merck or Fluka silica gel 60 (40-63  $\mu\text{m}$ ) using a forced flow of 0.5 bar.  $^1\text{H}$  NMR,  $^{13}\text{C}$  NMR and  $^{19}\text{F}$  NMR spectra were recorded on *DPX 300*, *AV 400 or 600* at 300 K. Chemical shifts were expressed in parts per million (ppm) with respect to the residual solvent peak. Coupling constants were reported as Hertz (Hz), signal shapes and splitting patterns were indicated as follows: s, singlet; brs, broad singlet; d, doublet; t, triplet; q, quartet; m, multiplet. Mass spectra were recorded on a *Finnigan MAT 4200S*, a *Bruker Daltonics Micro Tof*, a *Waters-Micromass Quattro LCZ* (ESI); peaks are given in  $m/z$  (% of basis peak).

## 2. General experimental procedure

Quinoxalin-2(1*H*)-ones **1aa-1am**<sup>1</sup>, **1an**<sup>2</sup> were prepared according to the reported procedures.

General experimental procedure for the reaction of quinoxalin-2(1*H*)-ones **1**, alkenes **2** and perfluoroalkyl iodides **3**

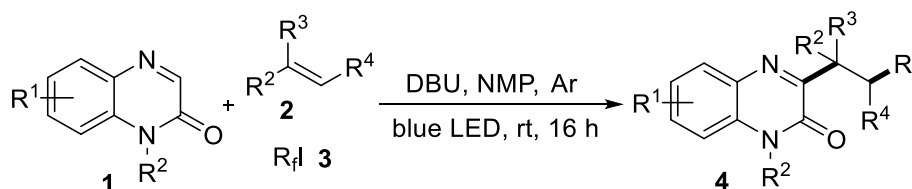

A Schlenk-tube equipped with a magnetic stir bar was charged with a quinoxalin-2(1*H*)-one **1** (0.2 mmol) and then evacuated and backfilled with Ar 3 times. Afterwards, NMP (0.5 mL), an alkene **2** (2.5 equiv, 0.50 mmol), a perfluoroalkyl iodide **3** (2.0 equiv, 0.4 mmol) and DBU (3.0 equiv, 0.6 mmol) were added by syringe under Ar atmosphere.

The tightly sealed tube was then irradiated with a 5 W blue LEDs (the distance between the tube and the light source was about 5 cm) and simultaneously cooled by a fan to keep the reaction temperature at 25 °C. After 16 hours, the mixture was transferred into a 100 mL separating funnel which contained 20 mL H<sub>2</sub>O. The mixture was extracted twice with Et<sub>2</sub>O (20 mL each) and the combined organic layer was washed with brine (20 mL) once and dried by Na<sub>2</sub>SO<sub>4</sub>. After filtration, the filtrate was concentrated under reduced pressure to give the crude product, which was purified by flash chromatography on silica gel (EtOAc:pentane = 1:8 to 1:1) to give the product **4**.

Scaled-up synthesis of compound **4a**

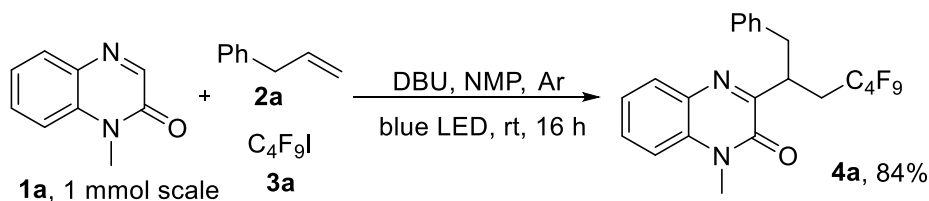

A Schlenk-tube equipped with a magnetic stir bar was charged with a quinoxalin-2(1*H*)-one **1** (1 mmol, 160 mg) and then evacuated and backfilled with Ar 3 times. Afterwards, NMP (2.5 mL), allylbenzene **2a** (2.5 equiv, 2.50 mmol, 295mg), perfluorobutyl iodide **3** (2.0 equiv, 2 mmol, 692 mg) and DBU (3.0 equiv, 3 mmol, 456 mg) were added by syringe under Ar atmosphere. The tightly sealed tube was then irradiated with a 5 W blue LEDs (the distance between the tube and the light source was about 5 cm) and simultaneously cooled by a fan to keep the reaction temperature at 25 °C. After 16 hours, the mixture was transferred into a 100 mL separating funnel which contained 30 mL H<sub>2</sub>O. The mixture was extracted twice with Et<sub>2</sub>O (30 mL each) and the combined organic layer was washed with brine (30 mL) once and dried by Na<sub>2</sub>SO<sub>4</sub>. After filtration, the filtrate was concentrated under reduced pressure to give the crude product, which was purified by flash chromatography on silica gel (EtOAc:pentane = 1:8) to give the product **4a** as a colloidal solid in 84% yield (415.6 mg).

### 3. UV/Vis absorption spectra

The UV/Vis absorption spectra of NMP solutions of DBU (0.1 M), C<sub>4</sub>F<sub>9</sub>I (0.1 M), and

a mixture of  $C_4F_9I$  and DBU are shown in Figure S1. A bathochromic shift can be observed, indicating the formation of an EDA complex.

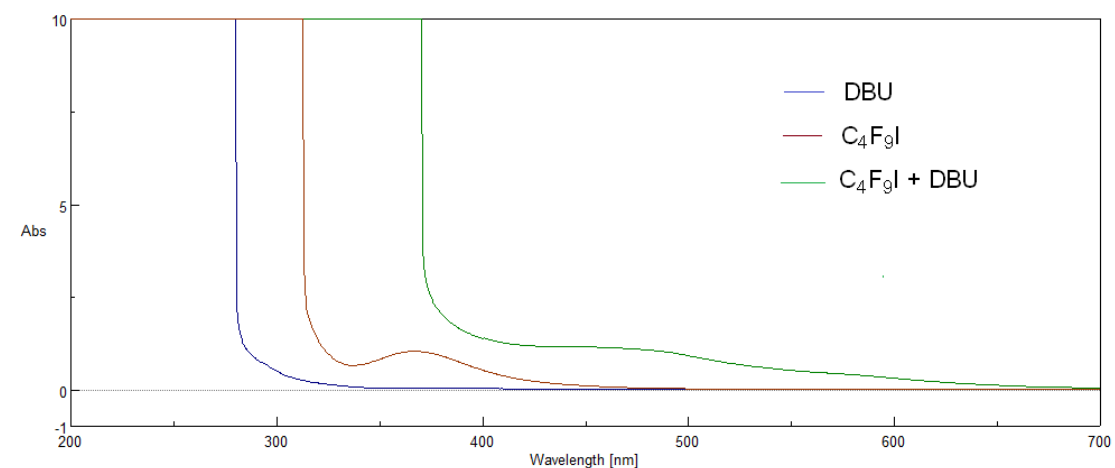

Reference:

1. A. Carrër, J.-D. Brion, S. Messaoudi, and M. Alami, *Org. Lett.*, 2013, **15**, 5606.
2. M. Kaftory, V. Shteiman, T. Lavy, J. R. Scheffer, J. Yang, and V. Enkelmann, *Eur. J. Org. Chem.*, 2005, 847.

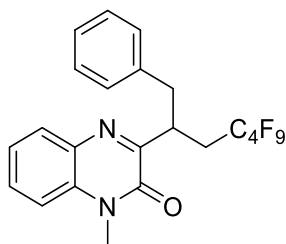

1-Methyl-3-(7,7,7,7,7,7,7,7,7-nonafluoro-1-phenyl-7 $\lambda$ <sup>12</sup>-hepta-4,6-diyn-2-yl)quinoxalin-2(1*H*)-one (**4a**): According to the General Procedure, **4a** (87.6 mg, 88%) was prepared as a colloidal solid. <sup>1</sup>H NMR (300 MHz, CDCl<sub>3</sub>)  $\delta$  7.76 (dd, *J* = 8.0, 1.4 Hz, 1H), 7.52 – 7.42 (m, 1H), 7.31 – 7.09 (m, 7H), 4.26 – 4.17 (m, 1H), 3.62 (s, 3H), 3.27 – 2.93 (m, 2H), 2.73 (dd, *J* = 13.6, 8.9 Hz, 1H), 2.22 (dd, *J* = 37.6, 17.7 Hz, 1H); <sup>13</sup>C NMR (75 MHz, CDCl<sub>3</sub>)  $\delta$  160.28, 154.26, 138.42, 133.09, 132.46, 130.14, 129.96, 129.23, 128.50, 126.60, 123.64, 113.61, 39.82, 36.41, 31.71 (s), 31.44 (t, *J* = 21.0 Hz), 29.15, <sup>13</sup>C-NMR for CF<sub>2</sub>CF<sub>2</sub>CF<sub>2</sub>CF<sub>3</sub> could not be assigned; <sup>19</sup>F NMR (282 MHz, CDCl<sub>3</sub>)  $\delta$  -81.09 (tt, *J* = 9.7, 3.1 Hz, 3F), -112.47 (t, *J* = 12.7 Hz, 2F), -124.45 (m, 2F), -125.71 – -126.12 (m, 2F); FTIR (neat):  $\tilde{\nu}$  = 2951, 1652, 1603, 1474, 1216, 1131, 1100, 749, 701; HRMS (ESI): Calcd for [C<sub>22</sub>H<sub>17</sub>F<sub>9</sub>N<sub>2</sub>O+Na]<sup>+</sup>: 519.1089, found: 519.1082.

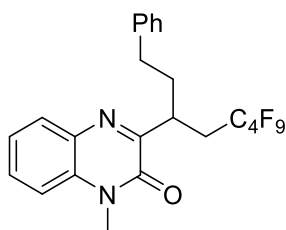

1-Methyl-3-(8,8,8,8,8,8,8,8,8-nonafluoro-1-phenyl-8 $\lambda$ <sup>12</sup>-octa-5,7-diyn-3-yl)quinoxalin-2(1*H*)-one (**4b**): According to the General Procedure, **4b** (98.3 mg, 97%) was prepared as a colorless oil. <sup>1</sup>H NMR (300 MHz, CDCl<sub>3</sub>)  $\delta$  7.75 (dd, *J* = 8.0, 1.5 Hz, 1H), 7.45 (td, *J* = 8.7, 1.5 Hz, 1H), 7.25 (td, *J* = 8.0, 1.2 Hz, 1H), 7.21 – 6.96 (m, 6H), 4.04 – 3.91 (m, 1H), 3.58 (s, 3H), 3.20 – 2.95 (m, 1H), 2.72 – 2.11 (m, 4H), 1.95 (m, 1H); <sup>19</sup>F NMR (282 MHz, CDCl<sub>3</sub>)  $\delta$  -81.05 (tt, *J* = 9.7, 3.1 Hz, 3F), -111.44 – -114.09 (m, 2F), -124.42 (dd, *J* = 18.2, 8.9 Hz, 2F), -125.59 – -125.99 (m, 2F); <sup>13</sup>C NMR (75 MHz, CDCl<sub>3</sub>)  $\delta$  160.6, 154.3, 141.2, 133.1, 132.4, 130.1, 129.7, 128.3, 128.2, 125.8, 123.6, 113.5, 35.7, 35.0, 33.3, 32.8 (t, *J* = 20.25 Hz), 32.6, 29.1, <sup>13</sup>C-NMR for CF<sub>2</sub>CF<sub>2</sub>CF<sub>2</sub>CF<sub>3</sub> could not be assigned; FTIR (neat):  $\tilde{\nu}$  = 2940, 1653, 1603, 1474, 1217,

1199, 1165, 1131, 878, 751, 698; HRMS (ESI): Calcd for [C<sub>23</sub>H<sub>19</sub>F<sub>9</sub>N<sub>2</sub>O+Na]<sup>+</sup>: 533.1246, found: 533.1238.

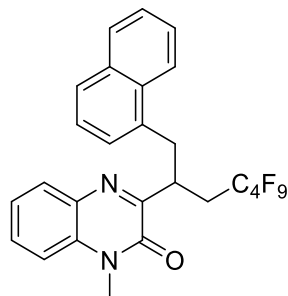

1-Methyl-3-(7,7,7,7,7,7,7,7,7-nonafluoro-1-(naphthalen-1-yl)-7λ<sup>12</sup>-hepta-4,6-diyn-2-yl)quinoxalin-2(1H)-one (**4c**): According to the General Procedure, **4c** (82.8 mg, 76%) was prepared as a colorless oil. <sup>1</sup>H NMR (300 MHz, CDCl<sub>3</sub>) δ 8.48 (d, *J* = 8.4 Hz, 1H), 7.95 – 7.84 (m, 2H), 7.79 (dd, *J* = 7.3, 2.1 Hz, 1H), 7.68 – 7.49 (m, 3H), 7.29 – 7.45 (m, 4H), 4.63 – 4.46 (m, 1H), 3.89 – 3.70 (m, 4H), 3.50 – 3.09 (m, 2H), 2.37 (dd, *J* = 37.8, 17.9 Hz, 1H); <sup>19</sup>F NMR (282 MHz, CDCl<sub>3</sub>) δ -81.11 (tt, *J* = 9.7, 3.1 Hz, 3F), -112.35 (s, 2F), -124.30 – -124.70 (m, 2F), -125.80 – -126.10 (m, 2F); <sup>13</sup>C NMR (75 MHz, CDCl<sub>3</sub>) δ 160.4, 154.4, 134.4, 134.0, 133.1, 132.5, 132.2, 130.1, 129.9, 128.7, 127.74, 127.70, 126.3, 125.7, 125.1, 124.0, 123.6, 113.6, 37.3, 35.6, 31.6, 31.3 (t, *J* = 20.3 Hz), 29.2, <sup>13</sup>C-NMR for CF<sub>2</sub>CF<sub>2</sub>CF<sub>2</sub>CF<sub>3</sub> could not be assigned; FTIR (neat):  $\tilde{\nu}$  = 2951, 1651, 1603, 1474, 1219, 1166, 1133, 1101, 778, 754, 723; HRMS (ESI): Calcd for [C<sub>26</sub>H<sub>19</sub>F<sub>9</sub>N<sub>2</sub>O+Na]<sup>+</sup>: 569.1246, found: 569.1237.

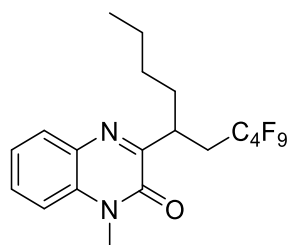

1-Methyl-3-(10,10,10,10,10,10,10,10,10,10-nonafluoro-10λ<sup>12</sup>-deca-7,9-diyn-5-yl)quinoxalin-2(1H)-one (**4d**): According to the General Procedure, **4d** (86.9 mg, 94%) was prepared as a colorless oil. <sup>1</sup>H NMR (300 MHz, CDCl<sub>3</sub>) δ 7.76 (dd, *J* = 7.9, 1.5 Hz, 1H), 7.50 – 7.40 (m, 1H), 7.31 – 7.17 (m, 2H), 3.89 (m, 1H), 3.63 (s, 3H), 3.21 – 2.94

(m, 1H), 2.37 – 2.14 (m, 1H), 1.85 – 1.50 (m, 2H), 1.35 – 1.11 (m, 4H), 0.79 (t,  $J = 6.9$  Hz, 3H);  $^{19}\text{F}$  NMR (282 MHz,  $\text{CDCl}_3$ )  $\delta$  -81.10 (tt,  $J = 9.7, 3.2$  Hz, 3F), -111.41 – -114.33 (m, 2F), -124.49 (m, 2F), -125.67 – -126.10 (m);  $^{13}\text{C}$  NMR (75 MHz,  $\text{CDCl}_3$ )  $\delta$  161.1, 154.4, 133.0, 132.4, 129.96, 129.92, 123.5, 113.5, 34.5, 34.1, 32.5 (t,  $J = 21.0$  Hz), 29.1, 29.0, 22.5, 13.8,  $^{13}\text{C}$ -NMR for  $\text{CF}_2\text{CF}_2\text{CF}_2\text{CF}_3$  could not be assigned; FTIR (neat):  $\tilde{\nu} = 2960, 2937, 1656, 1604, 1475, 1217, 1132, 1088, 877, 752, 722$ ; HRMS (ESI): Calcd for  $[\text{C}_{19}\text{H}_{19}\text{F}_9\text{N}_2\text{O}+\text{Na}]^+$ : 485.1246, found: 485.1250.

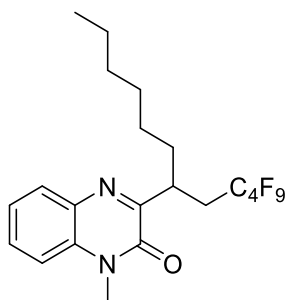

1-Methyl-3-(1,1,1,1,1,1,1,1,1-nonfluoro-1 $\lambda$ <sup>12</sup>-dodeca-1,3-diyn-6-yl)quinoxalin-2(1H)-one (**4e**): According to the General Procedure, **4e** (90.2 mg, 92%) was prepared as a colorless oil.  $^1\text{H}$  NMR (300 MHz,  $\text{CDCl}_3$ )  $\delta$  7.87 (dd,  $J = 7.9, 1.5$  Hz, 1H), 7.57 (ddd,  $J = 8.6, 7.4, 1.5$  Hz, 1H), 7.42 – 7.28 (m, 2H), 3.95 – 4.04 (m, 1H), 3.75 (s, 3H), 3.08 – 3.29 (m, 1H), 2.55 – 2.23 (m, 1H), 2.03 – 1.61 (m, 2H), 1.48 – 1.20 (m, 8H), 0.88 (t,  $J = 9.1$  Hz, 3H);  $^{19}\text{F}$  NMR (282 MHz,  $\text{CDCl}_3$ )  $\delta$  -81.10 (tt,  $J = 9.7, 3.2$  Hz, 3F), -111.53 – -114.31 (m, 2F), -124.53 – -124.44 (m, 2F), -125.95 – -125.84 (m, 2F);  $^{13}\text{C}$  NMR (75 MHz,  $\text{CDCl}_3$ )  $\delta$  161.1, 154.4, 133.0, 132.4, 129.96, 129.92, 123.5, 113.5, 34.6, 34.3, 32.57 (t,  $J = 21.0$  Hz), 31.6, 29.1, 26.9, 22.5, 13.9,  $^{13}\text{C}$ -NMR for  $\text{CF}_2\text{CF}_2\text{CF}_2\text{CF}_3$  could not be assigned; FTIR (neat):  $\tilde{\nu} = 2929, 1655, 1603, 1474, 1217, 1132, 1166, 1089, 881, 751, 722$ ; HRMS (ESI): Calcd for  $[\text{C}_{21}\text{H}_{23}\text{F}_9\text{N}_2\text{O}+\text{Na}]^+$ : 513.1559, found: 513.1533.

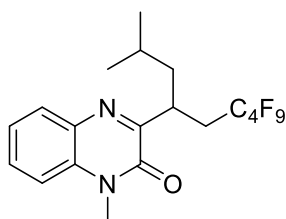

1-Methyl-3-(9,9,9,9,9,9,9,9,9-nonafluoro-2-methyl-9 $\lambda$ <sup>12</sup>-nona-6,8-diyn-4-yl)quinoxalin-2(1*H*)-one (**4f**): According to the General Procedure, **4f** (90.7 mg, 98%) was prepared as a colorless oil. <sup>1</sup>H NMR (300 MHz, CDCl<sub>3</sub>)  $\delta$  7.75 (dd, *J* = 7.9, 1.5 Hz, 1H), 7.46 (ddd, *J* = 8.6, 7.5, 1.5 Hz, 1H), 7.30 – 7.17 (m, 2H), 4.05 – 3.89 (m, 1H), 3.64 (s, 3H), 3.20 – 2.93 (m, 1H), 2.37 – 2.10 (m, 1H), 1.78 – 1.32 (m, 3H), 0.89 (d, *J* = 6.3 Hz, 3H), 0.88(d, *J* = 6.3 Hz, 3H); <sup>19</sup>F NMR (282 MHz, CDCl<sub>3</sub>)  $\delta$  -81.08 (tt, *J* = 9.7, 3.2 Hz, 3F), -111.32 – -114.55 (m, 2F), -123.97 – -125.28 (m, 2F), -125.55 – -126.32 (m, 2F); <sup>13</sup>C NMR (75 MHz, CDCl<sub>3</sub>)  $\delta$  161.4, 154.3, 133.0, 132.5, 129.96, 129.90, 123.5, 113.5, 43.6, 32.87 (t, *J* = 21.0 Hz), 29.1, 25.9, 22.6, 22.2, <sup>13</sup>C-NMR for CF<sub>2</sub>CF<sub>2</sub>CF<sub>2</sub>CF<sub>3</sub> could not be assigned; FTIR (neat):  $\tilde{\nu}$  = 2960, 1654, 1604, 1474, 1216, 1165, 1132, 1089, 881, 752, 723; HRMS (ESI): Calcd for [C<sub>19</sub>H<sub>19</sub>F<sub>9</sub>N<sub>2</sub>O+Na] <sup>+</sup>: 485.1246, found: 485.1256.

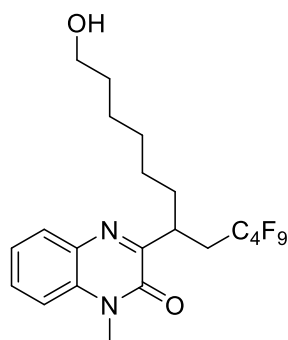

1-Methyl-3-(1,1,1,1,1,1,1,1,1-nonafluoro-12-hydroxy-1 $\lambda$ <sup>12</sup>-dodeca-1,3-diyn-6-yl)quinoxalin-2(1*H*)-one (**4g**): According to the General Procedure, **4g** (99.0 mg, 98%) was prepared as a colorless oil. <sup>1</sup>H NMR (300 MHz, CDCl<sub>3</sub>)  $\delta$  7.76 (dd, *J* = 7.9, 1.5 Hz, 1H), 7.52 – 7.42 (m, 1H), 7.33 – 7.18 (m, 2H), 3.96 – 3.80 (m, 1H), 3.64 (s, 3H), 3.59 – 3.47 (m, 2H), 2.97 – 3.18 (m, 1H), 2.37 – 2.13 (m, 1H), 1.74 – 1.84 (m, 1H), 1.60 – 1.14 (m, 10H); <sup>19</sup>F NMR (282 MHz, CDCl<sub>3</sub>)  $\delta$  -81.09 (tt, *J* = 9.7, 3.2 Hz, 3F), -111.51 – -114.11 (m, 2F), -124.52 – -124.43 (m, 2F), -125.94 – 125.86 (m, 2F); <sup>13</sup>C NMR (75 MHz, CDCl<sub>3</sub>)  $\delta$  161.0, 154.4, 133.0, 132.4, 130.0, 129.9, 123.6, 113.6, 62.7, 34.4, 34.1, 32.8, 32.5, 29.1, 29.0, 26.8, 25.3, <sup>13</sup>C-NMR for CF<sub>2</sub>CF<sub>2</sub>CF<sub>2</sub>CF<sub>3</sub> could not be assigned; FTIR (neat):  $\tilde{\nu}$  = 2933, 2860, 1651, 1603, 1217, 1131, 1086, 753, 722; HRMS (ESI): Calcd for [C<sub>21</sub>H<sub>23</sub>F<sub>9</sub>N<sub>2</sub>O<sub>2</sub>+Na] <sup>+</sup>: 529.1508, found: 529.1503.



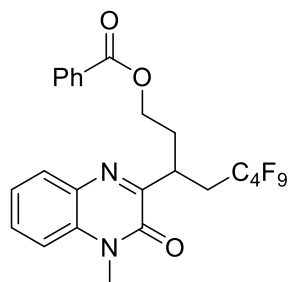

8,8,8,8,8,8,8,8,8-Nonafluoro-3-(4-methyl-3-oxo-3,4-dihydroquinoxalin-2-yl)-8 $\lambda$ <sup>12</sup>-octa-5,7-diyn-1-yl benzoate (**4h**): According to the General Procedure, **4h** (60.1 mg, 54%) was prepared as a colorless oil. <sup>1</sup>H NMR (300 MHz, CDCl<sub>3</sub>)  $\delta$  7.74 (dd,  $J$  = 8.0, 1.5 Hz, 1H), 7.69 – 7.62 (m, 2H), 7.48 – 7.32 (m, 2H), 7.29 – 7.21 (m, 1H), 7.21 – 7.02 (m, 3H), 4.42 – 4.24 (m, 2H), 4.17 – 4.05 (m, 1H), 3.44 (s, 3H), 3.23 – 2.93 (m, 1H), 2.55 – 2.12 (m, 3H); <sup>19</sup>F NMR (282 MHz, CDCl<sub>3</sub>)  $\delta$  -81.05 (tt,  $J$  = 9.7, 3.1 Hz, 3F), -111.30 – -114.49 (m, 2F), -124.06 – -124.60 (m, 2F), -125.86 (t,  $J$  = 10.2 Hz, 2F); <sup>13</sup>C NMR (75 MHz, CDCl<sub>3</sub>)  $\delta$  166.0, 160.0, 154.3, 133.0, 132.70 (s), 132.4, 130.1, 129.98, 129.90, 129.2, 128.1, 123.6, 113.5, 62.8, 33.2 (t,  $J$  = 21.0 Hz), 33.0, 32.9, 28.9, <sup>13</sup>C-NMR for CF<sub>2</sub>CF<sub>2</sub>CF<sub>2</sub>CF<sub>3</sub> could not be assigned; FTIR (neat):  $\tilde{\nu}$  = 2955, 1721, 1655, 1604, 1273, 1233, 1133, 1115, 712; HRMS (ESI): Calcd for [C<sub>24</sub>H<sub>19</sub>F<sub>9</sub>N<sub>2</sub>O<sub>3</sub>+Na]<sup>+</sup>: 577.1144, found: 577.1144.

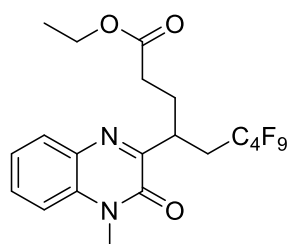

Ethyl 9,9,9,9,9,9,9,9,9-nonafluoro-4-(4-methyl-3-oxo-3,4-dihydroquinoxalin-2-yl)-9 $\lambda$ <sup>12</sup>-nona-6,8-diynoate (**4i**): According to the General Procedure, **4i** (91.8 mg, 91%) was prepared as a colorless oil. <sup>1</sup>H NMR (300 MHz, CDCl<sub>3</sub>)  $\delta$  7.76 (dd,  $J$  = 7.9, 1.5 Hz, 1H), 7.48 (ddd,  $J$  = 8.6, 7.5, 1.5 Hz, 1H), 7.23 – 7.30 (m, 2H), 4.03 – 3.87 (m, 3H), 3.64 (s, 3H), 3.19 – 2.92 (m, 1H), 2.40 – 2.00 (m, 5H), 1.11 (t,  $J$  = 7.1 Hz, 3H); <sup>19</sup>F NMR (282 MHz, CDCl<sub>3</sub>)  $\delta$  -81.07 (tt,  $J$  = 9.7, 3.2 Hz, 3F), -111.53 – -114.58 (m, 2F), -124.15 – -124.71 (m, 2F), -125.94 – -125.85 (m, 2F); <sup>13</sup>C NMR (75 MHz, CDCl<sub>3</sub>)  $\delta$  172.6, 159.9, 154.3, 133.1, 132.3, 130.2, 130.0, 123.6, 113.6, 60.4, 34.0, 32.99 (t,  $J$  = 21.0 Hz),

31.5, 29.1, 28.9, 14.0,  $^{13}\text{C}$ -NMR for  $\text{CF}_2\text{CF}_2\text{CF}_2\text{CF}_3$  could not be assigned; FTIR (neat):  $\tilde{\nu} = 2984, 1732, 1653, 1604, 1474, 1216, 1164, 1131, 1107, 754$ ; HRMS (ESI): Calcd for  $[\text{C}_{20}\text{H}_{19}\text{F}_9\text{N}_2\text{O}_3+\text{Na}]^+$ : 529.1144, found: 529.1135.

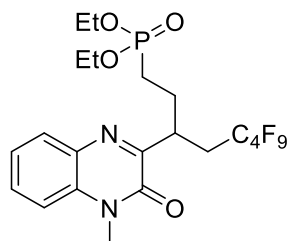

Diethyl (8,8,8,8,8,8,8,8,8-nonafluoro-3-(4-methyl-3-oxo-3,4-dihydroquinoxalin-2-yl)- $8\lambda^{12}$ -octa-5,7-diyn-1-yl)phosphonate (**4j**): According to the General Procedure, **4j** (101.8 mg, 89%) was prepared as a colorless oil.  $^1\text{H}$  NMR (300 MHz,  $\text{CDCl}_3$ )  $\delta$  7.76 (dd,  $J = 8.0, 1.4$  Hz, 1H), 7.53 – 7.45 (m, 1H), 7.32 – 7.20 (m, 2H), 4.04 – 3.91 (m, 5H), 3.64 (s, 3H), 3.15 – 2.86 (m, 1H), 2.32 – 1.98 (m, 4H), 1.86 – 1.52 (m, 2H), 1.21 (td,  $J = 7.1, 2.7$  Hz, 6H);  $^{19}\text{F}$  NMR (282 MHz,  $\text{CDCl}_3$ )  $\delta$  -81.10 (tt,  $J = 9.7, 3.1$  Hz, 3F), -111.30 – -114.54 (m, 2F), -124.31 – -124.68 (m, 2F), -125.94 – 125.87 (m, 2F);  $^{13}\text{C}$  NMR (75 MHz,  $\text{CDCl}_3$ )  $\delta$  159.5, 154.3, 133.0, 132.3, 130.4, 130.0, 123.7, 113.6, 61.6 (d,  $J = 6.5$  Hz), 34.8 (d,  $J = 18.4$  Hz), 32.68 (t,  $J = 21.0$  Hz), 29.2, 26.78 (d,  $J = 4.0$  Hz), 24.0, 22.1, 16.33 (d,  $J = 5.9$  Hz),  $^{13}\text{C}$ -NMR for  $\text{CF}_2\text{CF}_2\text{CF}_2\text{CF}_3$  could not be assigned; FTIR (neat):  $\tilde{\nu} = 2984, 1651, 1603, 1218, 1132, 1055, 1024, 959, 756, 722$ ; HRMS (ESI): Calcd for  $[\text{C}_{21}\text{H}_{24}\text{F}_9\text{N}_2\text{PO}_4+\text{Na}]^+$ : 593.1222, found: 593.1219.

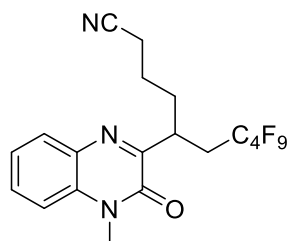

10,10,10,10,10,10,10,10,10-Nonafluoro-5-(4-methyl-3-oxo-3,4-dihydroquinoxalin-2-yl)- $10\lambda^{12}$ -deca-7,9-diyne nitrile (**4k**): According to the General Procedure, **4k** (57.9 mg, 61%) was prepared as a colorless oil.  $^1\text{H}$  NMR (300 MHz,  $\text{CDCl}_3$ )  $\delta$  7.77 (dd,  $J = 8.0, 1.4$  Hz, 1H), 7.55 – 7.46 (m, 1H), 7.34 – 7.23 (m, 2H), 3.89 – 3.98 (m, 1H), 3.65 (s,

3H), 3.17 – 2.88 (m, 1H), 2.39 – 2.16 (m, 3H), 2.08 – 1.90 (m, 1H), 1.74 – 1.86 (m, 1H), 1.72 – 1.51 (m, 2H);  $^{19}\text{F}$  NMR (282 MHz,  $\text{CDCl}_3$ )  $\delta$  -81.05 (tt,  $J = 9.7, 3.1$  Hz, 3F), -111.44 – -114.44 (m, 2F), -123.91 – -124.69 (m, 2F), -125.91 – -125.83 (m, 2F);  $^{13}\text{C}$  NMR (75 MHz,  $\text{CDCl}_3$ )  $\delta$  159.7, 154.3, 133.0, 132.3, 130.4, 130.0, 123.8, 119.1, 113.7, 33.7, 33.1, 33.0 (t,  $J = 21.0$  Hz), 29.2, 22.9, 16.9,  $^{13}\text{C}$ -NMR for  $\text{CF}_2\text{CF}_2\text{CF}_2\text{CF}_3$  could not be assigned; FTIR (neat):  $\tilde{\nu} = 2943, 1653, 1604, 1220, 1133, 880, 755, 723$ ; HRMS (ESI): Calcd for  $[\text{C}_{19}\text{H}_{16}\text{F}_9\text{N}_3\text{O}+\text{Na}]^+$ : 496.1042, found: 496.1034.

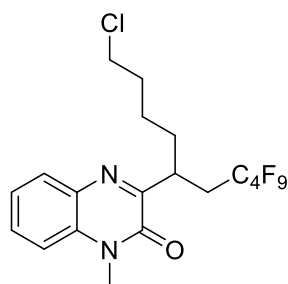

3-(1-Chloro-10,10,10,10,10,10,10,10,10,10-nonafluoro-10 $\lambda$ <sup>12</sup>-deca-7,9-diyne-5-yl)-1-methylquinoxalin-2(1*H*)-one (**41**): According to the General Procedure, **41** (84.3 mg, 85%) was prepared as a colorless oil.  $^1\text{H}$  NMR (300 MHz,  $\text{CDCl}_3$ )  $\delta$  7.76 (dd,  $J = 8.0, 1.5$  Hz, 1H), 7.48 (ddd,  $J = 8.6, 7.4, 1.5$  Hz, 1H), 7.22 – 7.30 (m, 2H), 4.00 – 3.83 (m, 1H), 3.64 (s, 3H), 3.43 (t,  $J = 6.6$  Hz, 2H), 3.21 – 2.94 (m, 1H), 2.43 – 2.13 (m, 1H), 1.94 – 1.30 (m, 6H);  $^{19}\text{F}$  NMR (282 MHz,  $\text{CDCl}_3$ )  $\delta$  -81.07 (tt,  $J = 9.7, 3.2$  Hz, 3F), -111.43 – -114.41 (m, 2F), -124.27 – -124.62 (m, 2F), -125.89 (t,  $J = 10.6$  Hz, 2F);  $^{13}\text{C}$  NMR (75 MHz,  $\text{CDCl}_3$ )  $\delta$  160.6, 154.3, 133.0, 132.4, 130.1, 129.9, 123.6, 113.6, 44.5, 34.3, 33.3, 32.6 (t,  $J = 21.7$  Hz), 32.2, 29.1, 24.1,  $^{13}\text{C}$ -NMR for  $\text{CF}_2\text{CF}_2\text{CF}_2\text{CF}_3$  could not be assigned; FTIR (neat):  $\tilde{\nu} = 2950, 1652, 1603, 1217, 1131, 880, 753, 722$ ; HRMS (ESI): Calcd for  $[\text{C}_{19}\text{H}_{18}\text{ClF}_9\text{N}_2\text{O}+\text{Na}]^+$ : 519.0856, found: 519.0856.

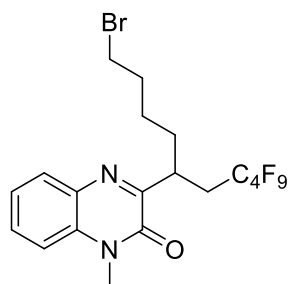

3-(1-Bromo-10,10,10,10,10,10,10,10,10-nonafluoro-10 $\lambda$ <sup>12</sup>-deca-7,9-diyn-5-yl)-1-methylquinoxalin-2(1*H*)-one (**4m**): According to the General Procedure, **4m** (56.9 mg, 53%) was prepared as a colorless oil. <sup>1</sup>H NMR (300 MHz, CDCl<sub>3</sub>)  $\delta$  7.77 (dd, *J* = 8.0, 1.4 Hz, 1H), 7.48 (ddd, *J* = 8.6, 7.4, 1.5 Hz, 1H), 7.23 – 7.31 (m, 2H), 3.97 – 3.83 (m, 1H), 3.65 (s, 3H), 3.30 (t, *J* = 6.7 Hz, 2H), 3.21 – 2.92 (m, 1H), 2.45 – 2.12 (m, 1H), 1.88 – 1.31 (m, 7H); <sup>19</sup>F NMR (282 MHz, CDCl<sub>3</sub>)  $\delta$  -81.05 (tt, *J* = 9.7, 3.1 Hz, 3F), -111.48 – -114.12 (m, 2F), -124.27 – -124.62 (m, 2F), -125.87 (t, *J* = 10.5 Hz, 2F); <sup>13</sup>C NMR (75 MHz, CDCl<sub>3</sub>)  $\delta$  160.5, 154.3, 133.0, 132.4, 130.1, 129.9, 123.6, 113.6, 34.3, 33.2, 33.1, 32.63 (t, *J* = 21.0 Hz), 32.3, 29.2, 25.3, <sup>13</sup>C-NMR for CF<sub>2</sub>CF<sub>2</sub>CF<sub>2</sub>CF<sub>3</sub> could not be assigned; FTIR (neat):  $\tilde{\nu}$  = 2941, 1652, 1604, 1474, 1218, 1132, 880, 754, 722; HRMS (ESI): Calcd for [C<sub>19</sub>H<sub>18</sub>BrF<sub>9</sub>N<sub>2</sub>O+Na]<sup>+</sup>: 563.0351, found: 563.0345.

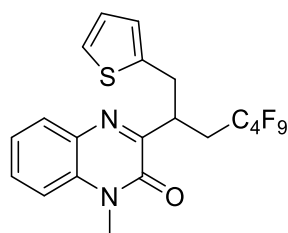

1-Methyl-3-(7,7,7,7,7,7,7,7,7-nonafluoro-1-(thiophen-2-yl)-7 $\lambda$ <sup>12</sup>-hepta-4,6-diyn-2-yl)quinoxalin-2(1*H*)-one (**4n**): According to the General Procedure, **4n** (59.0 mg, 57%) was prepared as a colorless oil. <sup>1</sup>H NMR (300 MHz, CDCl<sub>3</sub>)  $\delta$  7.65 (dd, *J* = 8.0, 1.4 Hz, 1H), 7.42 – 7.32 (m, 1H), 7.11 – 7.19 (m, 2H), 6.91 (dd, *J* = 5.1, 1.1 Hz, 1H), 6.64 – 6.71 (m, 2H), 4.09 (ddd, *J* = 12.0, 9.8, 3.8 Hz, 1H), 3.52 (s, 3H), 3.25 (dd, *J* = 14.7, 6.4 Hz, 1H), 3.10 – 2.79 (m, 2H), 2.39 – 2.11 (m, 1H); <sup>19</sup>F NMR (282 MHz, CDCl<sub>3</sub>)  $\delta$  -81.06 (tt, *J* = 9.7, 3.1 Hz, 3F), -111.30 – -113.66 (m, 2F), -124.16 – -124.64 (m, 2F), -125.72 – -126.05 (m, 2F); <sup>13</sup>C NMR (75 MHz, CDCl<sub>3</sub>)  $\delta$  159.6, 154.2, 140.6, 133.1, 132.4, 130.2, 130.0, 126.8, 126.1, 124.2, 123.6, 113.6, 36.9, 33.5, 31.7 (d, *J* = 21.0 Hz), 29.1, <sup>13</sup>C-NMR for CF<sub>2</sub>CF<sub>2</sub>CF<sub>2</sub>CF<sub>3</sub> could not be assigned; FTIR (neat):  $\tilde{\nu}$  = 2952, 1652, 1603, 1474, 1217, 1132, 1095, 884, 752, 726; HRMS (ESI): Calcd for [C<sub>20</sub>H<sub>15</sub>F<sub>9</sub>N<sub>2</sub>O+Na]<sup>+</sup>: 525.0654, found: 525.0652.

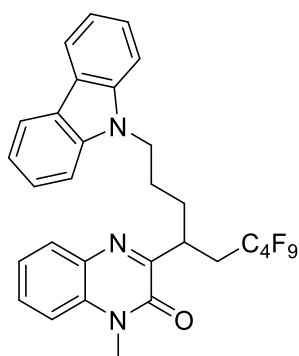

3-(1-(9*H*-Carbazol-9-yl)-9,9,9,9,9,9,9,9,9-nonafluoro-9 $\lambda$ <sup>12</sup>-nona-6,8-diyn-4-yl)-1-methylquinoxalin-2(1*H*)-one (**4o**): According to the General Procedure, **4o** (85.0 mg, 70%) was prepared as a colorless oil. <sup>1</sup>H NMR (300 MHz, CDCl<sub>3</sub>)  $\delta$  7.96 (d, *J* = 7.7 Hz, 2H), 7.67 (dd, *J* = 8.0, 1.5 Hz, 1H), 7.43 (ddd, *J* = 8.6, 7.4, 1.5 Hz, 1H), 7.35 – 7.05 (m, 8H), 4.29 – 3.83 (m, 2H), 4.05 – 3.89 (m, 1H), 3.57 (s, 3H), 3.09 – 2.88 (m, 1H), 2.35 – 1.63 (m, 5H); <sup>19</sup>F NMR (282 MHz, CDCl<sub>3</sub>)  $\delta$  -81.02 (tt, *J* = 9.7, 3.1 Hz, 3F), -111.31 – -114.14 (m, 2F), -124.22 – -124.61 (m, 2F), -125.88 – -125.81 (m, 2F); <sup>13</sup>C NMR (75 MHz, CDCl<sub>3</sub>)  $\delta$  160.2, 154.3, 140.3, 133.0, 132.4, 130.2, 130.0, 125.6, 123.6, 122.8, 120.3, 118.8, 113.6, 108.6, 42.6, 34.2, 33.13 (t, *J* = 21.0 Hz), 31.6, 29.1, 25.9, <sup>13</sup>C-NMR for CF<sub>2</sub>CF<sub>2</sub>CF<sub>2</sub>CF<sub>3</sub> could not be assigned; FTIR (neat):  $\tilde{\nu}$  = 2950, 1649, 1602, 1464, 1217, 1132, 748, 723; HRMS (ESI): Calcd for [C<sub>30</sub>H<sub>24</sub>F<sub>9</sub>N<sub>3</sub>O+Na]<sup>+</sup>: 636.1668, found: 636.1671.

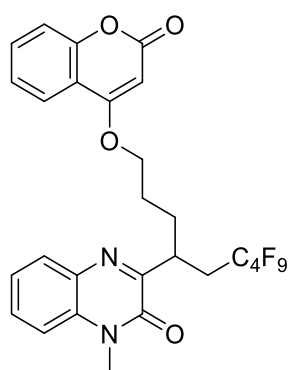

1-Methyl-3-(9,9,9,9,9,9,9,9,9-nonafluoro-1-((2-oxo-2*H*-chromen-4-yl)oxy)-9 $\lambda$ <sup>12</sup>-nona-6,8-diyn-4-yl)quinoxalin-2(1*H*)-one (**4p**): According to the General Procedure, **4p** (111.2 mg, 92%) was prepared as a colorless oil. <sup>1</sup>H NMR (300 MHz, CDCl<sub>3</sub>)  $\delta$  7.61 (ddd, *J* = 17.7, 7.9, 1.5 Hz, 2H), 7.43 – 7.28 (m, 2H), 7.21 – 7.01 (m, 4H), 5.39 (s, 1H), 4.00 – 3.85 (m, 3H), 3.51 (s, 3H), 3.14 – 2.78 (m, 1H), 1.96 – 2.34 m, 2H), 1.85 – 1.68

(m, 3H);  $^{19}\text{F}$  NMR (282 MHz,  $\text{CDCl}_3$ )  $\delta$  -81.06 (tt,  $J = 9.7, 3.1$  Hz, 3F), -111.34 – -114.21 (m, 2F), -124.24 – -124.72 (m, 2F), -125.91 – -125.83 (m, 2F);  $^{13}\text{C}$  NMR (75 MHz,  $\text{CDCl}_3$ )  $\delta$  165.4, 162.7, 160.1, 154.3, 153.3, 133.0, 132.3, 132.2, 130.4, 129.9, 123.7, 122.9, 116.6, 115.6, 113.6, 90.4, 68.6, 34.3, 33.05 (t,  $J = 21.0$  Hz), 30.2, 29.2, 25.9,  $^{13}\text{C}$ -NMR for  $\text{CF}_2\text{CF}_2\text{CF}_2\text{CF}_3$  could not be assigned; FTIR (neat):  $\tilde{\nu} = 2956, 1722, 1653, 1624, 1236, 1184, 1133, 1109, 752$ ; HRMS (ESI): Calcd for  $[\text{C}_{27}\text{H}_{21}\text{F}_9\text{N}_2\text{O}_4+\text{Na}]^+$ : 631.1250, found: 631.1255.

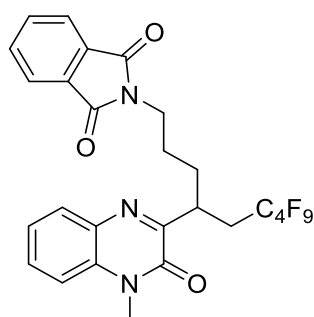

2-(9,9,9,9,9,9,9,9,9-Nonafluoro-4-(4-methyl-3-oxo-3,4-dihydroquinoxalin-2-yl)-9 $\lambda$ <sup>12</sup>-nona-6,8-diyne-1-yl)isoindoline-1,3-dione (**4q**): According to the General Procedure, **4q** (112.5 mg, 97%) was prepared as a colorless oil.  $^1\text{H}$  NMR (300 MHz,  $\text{CDCl}_3$ )  $\delta$  7.75 – 7.66 (m, 3H), 7.64 – 7.55 (m, 2H), 7.50 – 7.41 (m, 1H), 7.19 – 7.26 (m, 2H), 3.89 – 3.96 (m, 1H), 3.67 – 3.53 (m, 5H), 3.17 – 2.91 (m, 1H), 2.16 – 2.35 (m, 1H), 1.92 – 1.79 (m, 1H), 1.80 – 1.48 (m, 3H);  $^{19}\text{F}$  NMR (282 MHz,  $\text{CDCl}_3$ )  $\delta$  -81.08 (tt,  $J = 9.7, 3.1$  Hz, 3F), -111.28 – -114.27 (m, 2F), -124.29 – -124.66 (m, 2F), -125.89 (t,  $J = 10.8$  Hz, 2F);  $^{13}\text{C}$  NMR (75 MHz,  $\text{CDCl}_3$ )  $\delta$  168.2, 160.2, 154.3, 133.8, 133.0, 132.4, 132.1, 130.1, 129.9, 123.5, 123.1, 113.6, 37.76 (s), 34.29 (s), 32.88 (t,  $J = 21.1$  Hz), 31.5, 29.1, 25.9,  $^{13}\text{C}$ -NMR for  $\text{CF}_2\text{CF}_2\text{CF}_2\text{CF}_3$  could not be assigned; FTIR (neat):  $\tilde{\nu} = 2942, 1710, 1653, 1604, 1397, 1219, 1133, 755, 720$ ; HRMS (ESI): Calcd for  $[\text{C}_{26}\text{H}_{20}\text{F}_9\text{N}_3\text{O}_3+\text{Na}]^+$ : 616.1253, found: 616.1255.

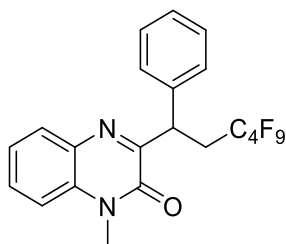

1-Methyl-3-(6,6,6,6,6,6,6,6,6-nonafluoro-1-phenyl)-6 $\lambda$ <sup>12</sup>-hexa-3,5-diyn-1-yl)quinoxalin-2(1*H*)-one (**4r**): According to the General Procedure, **4r** (32.8 mg, 34%) was prepared as a colorless oil. <sup>1</sup>H NMR (300 MHz, CDCl<sub>3</sub>)  $\delta$  7.85 (dd, *J* = 8.0, 1.5 Hz, 1H), 7.47 (ddd, *J* = 8.7, 7.4, 1.5 Hz, 1H), 7.38 – 7.41 (m, 2H), 7.34 – 7.25 (m, 1H), 7.25 – 7.09 (m, 4H), 5.15 (dd, *J* = 8.4, 4.9 Hz, 1H), 3.69 – 3.43 (m, 1H), 3.56 (s, 3H), 2.75 – 2.49 (m, 1H); <sup>19</sup>F NMR (282 MHz, CDCl<sub>3</sub>)  $\delta$  -81.02 (tt, *J* = 9.7, 3.2 Hz, 3F), -111.15 – -114.79 (m, 2F), -124.45 (d, *J* = 9.4 Hz, 2F), -125.85 – -125.73 (m, 2F); <sup>13</sup>C NMR (75 MHz, CDCl<sub>3</sub>)  $\delta$  158.6, 154.0, 139.8, 133.2, 132.3, 130.2, 130.1, 128.7, 128.4, 127.3, 123.6, 113.6, 39.7, 34.32 (t, *J* = 21.0 Hz), 29.1, <sup>13</sup>C-NMR for CF<sub>2</sub>CF<sub>2</sub>CF<sub>2</sub>CF<sub>3</sub> could not be assigned; FTIR (neat):  $\tilde{\nu}$  = 2956, 1654, 1604, 1474, 1218, 1132, 1076, 879, 753, 699; HRMS (ESI): Calcd for [C<sub>21</sub>H<sub>15</sub>F<sub>9</sub>N<sub>2</sub>O+Na]<sup>+</sup>: 505.0933, found: 505.0931.

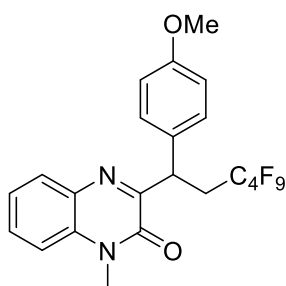

1-Methyl-3-(6,6,6,6,6,6,6,6,6-nonafluoro-1-(4-methoxyphenyl)-6 $\lambda$ <sup>12</sup>-hexa-3,5-diyn-1-yl)quinoxalin-2(1*H*)-one (**4s**): According to the General Procedure, **4s** (73.6 mg, 72%) was prepared as a colorless oil. <sup>1</sup>H NMR (300 MHz, CDCl<sub>3</sub>)  $\delta$  7.95 (dd, *J* = 8.0, 1.5 Hz, 1H), 7.62 – 7.51 (m, 1H), 7.47 – 7.36 (m, 3H), 7.34 – 7.25 (m, 1H), 6.90 – 6.82 (m, 2H), 5.21 (dd, *J* = 8.3, 5.1 Hz, 1H), 3.78 (s, 3H), 3.71 – 3.52 (m, 1H), 3.67 (s, 3H), 2.61 – 2.81 (m, 1H); <sup>19</sup>F NMR (282 MHz, CDCl<sub>3</sub>)  $\delta$  -81.04 (tt, *J* = 9.7, 3.2 Hz, 3F), -111.03 – -114.82 (m, 2F), -124.47 (d, *J* = 9.2 Hz, 2F), -125.64 – -126.01 (m, 2F); <sup>13</sup>C NMR (75 MHz, CDCl<sub>3</sub>)  $\delta$  158.87, 158.80, 154.0, 133.1, 132.3, 131.7, 130.1, 129.4, 123.6, 114.1, 113.5, 55.1, 38.9, 34.3 (t, *J* = 21.0 Hz), 29.1, <sup>13</sup>C-NMR for CF<sub>2</sub>CF<sub>2</sub>CF<sub>2</sub>CF<sub>3</sub> could

not be assigned; FTIR (neat):  $\tilde{\nu}$  = 2957, 1656, 1604, 1512, 1231, 1180, 1133, 1095, 1036, 879, 751; HRMS (ESI): Calcd for [C<sub>22</sub>H<sub>17</sub>F<sub>9</sub>N<sub>2</sub>O<sub>2</sub>+Na]<sup>+</sup>: 535.1039, found: 535.1033.

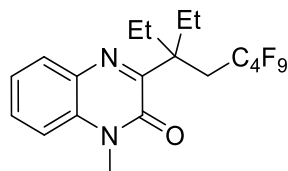

3-(3-Ethyl-8,8,8,8,8,8,8,8,8-nonafluoro-8λ<sup>12</sup>-octa-5,7-diyn-3-yl)-1-methylquinoxalin-2(1*H*)-one (**4t**): According to the General Procedure, **4t** (80.8 mg, 87%) was prepared as a white solid. <sup>1</sup>H NMR (300 MHz, CDCl<sub>3</sub>) δ 7.79 (dd, *J* = 7.9, 1.4 Hz, 1H), 7.49 – 7.39 (m, 1H), 7.18 – 7.28 (m, 2H), 3.59 (s, 3H), 2.99 (t, *J* = 21.6 Hz, 2H), 2.20 – 2.32 (m, 2H), 1.92 – 2.04 (m, 2H), 0.70 (t, *J* = 7.5 Hz, 6H); <sup>19</sup>F NMR (282 MHz, CDCl<sub>3</sub>) δ -81.11 (tt, *J* = 9.9, 2.9 Hz, 3F), -111.55 (t, *J* = 13.1 Hz, 2F), -124.65 – -124.55 (m, 2F), -125.51 – -126.02 (m, 2F); <sup>13</sup>C NMR (75 MHz, CDCl<sub>3</sub>) δ 161.2, 153.7, 133.0, 132.0, 130.4, 129.8, 123.3, 113.3, 47.2, 32.33 (t, *J* = 19.2 Hz), 28.8, 25.6, 7.8, <sup>13</sup>C-NMR for CF<sub>2</sub>CF<sub>2</sub>CF<sub>2</sub>CF<sub>3</sub> could not be assigned; FTIR (neat):  $\tilde{\nu}$  = 2969, 1652, 1473, 1217, 1130, 1081, 877, 751, 717; HRMS (ESI): Calcd for [C<sub>19</sub>H<sub>19</sub>F<sub>9</sub>N<sub>2</sub>O+Na]<sup>+</sup>: 485.1246, found: 485.1247.

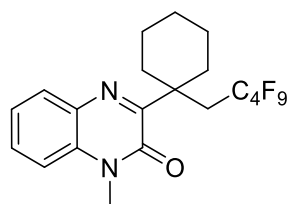

1-Methyl-3-(1-(5,5,5,5,5,5,5,5,5-nonafluoro-5λ<sup>12</sup>-penta-2,4-diyn-1-yl)cyclohexyl)quinoxalin-2(1*H*)-one (**4u**): According to the General Procedure, **4u** (88.5 mg, 93%) was prepared as a white solid. <sup>1</sup>H NMR (300 MHz, CDCl<sub>3</sub>) δ 7.80 (dd, *J* = 7.9, 1.5 Hz, 1H), 7.45 (ddd, *J* = 8.6, 7.4, 1.5 Hz, 1H), 7.30 – 7.17 (m, 2H), 3.59 (s, 3H), 3.01 (t, *J* = 21.6 Hz, 2H), 2.53 – 2.35 (m, 2H), 1.93 – 1.75 (m, 2H), 1.38 – 1.62 (m, 6H); <sup>19</sup>F NMR (282 MHz, CDCl<sub>3</sub>) δ -81.13 (tt, *J* = 9.8, 3.0 Hz, 3F), -110.60 – -111.81 (m, 2F), -124.53 – -124.5 (m, 2F), -125.55 – -126.01 (m, 2F); <sup>13</sup>C NMR (75



MHz, CDCl<sub>3</sub>) δ 161.2, 153.8, 133.1, 132.2, 130.3, 129.9, 123.3, 113.3, 44.2, 35.41 (t, *J* = 19.5), 34.8, 28.8, 26.2, 22.2, <sup>13</sup>C-NMR for CF<sub>2</sub>CF<sub>2</sub>CF<sub>2</sub>CF<sub>3</sub> could not be assigned; FTIR (neat):  $\tilde{\nu}$  = 2942, 1650, 1603, 1591, 1218, 1130, 1081, 878, 751, 724; HRMS (ESI): Calcd for [C<sub>20</sub>H<sub>19</sub>F<sub>9</sub>N<sub>2</sub>O+Na]<sup>+</sup>: 497.1246, found: 497.1242.

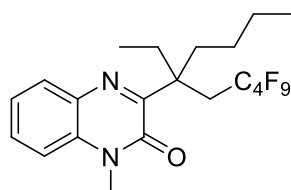

3-(5-Ethyl-10,10,10,10,10,10,10,10,10-nonafluoro-10λ<sup>12</sup>-deca-7,9-diyn-5-yl)-1-methylquinoxalin-2(1*H*)-one (**4v**): According to the General Procedure, **4v** (86.7 mg, 88%) was prepared as a colorless oil. <sup>1</sup>H NMR (300 MHz, CDCl<sub>3</sub>) δ 7.91 (dd, *J* = 7.9, 1.3 Hz, 1H), 7.61 – 7.51 (m, 1H), 7.42 – 7.28 (m, 2H), 3.71 (s, 3H), 3.28 – 2.94 (m, 2H), 2.46 – 1.97 (m, 4H), 1.43 – 1.00 (m, 4H), 0.92 (t, *J* = 7.3 Hz, 3H), 0.83 (t, *J* = 7.5 Hz, 3H); <sup>19</sup>F NMR (282 MHz, CDCl<sub>3</sub>) δ -81.13 (tt, *J* = 9.8, 2.8 Hz, 3F), -111.55 (t, *J* = 12.8 Hz, 2F), -124.57 – -124.68 (m, 2F), -125.50 – -125.96 (m, 2F); <sup>13</sup>C NMR (75 MHz, CDCl<sub>3</sub>) δ 161.3, 153.7, 133.0, 132.0, 130.4, 129.8, 123.2, 113.3, 47.0, 33.0, 32.66 (t, *J* = 19.0 Hz), 28.8, 26.2, 25.6, 23.1, 13.9, 7.9, <sup>13</sup>C-NMR for CF<sub>2</sub>CF<sub>2</sub>CF<sub>2</sub>CF<sub>3</sub> could not be assigned; FTIR (neat):  $\tilde{\nu}$  = 2960, 1652, 1472, 1230, 1216, 1130, 1080, 877, 752, 19; HRMS (ESI): Calcd for [C<sub>21</sub>H<sub>23</sub>F<sub>9</sub>N<sub>2</sub>O+Na]<sup>+</sup>: 513.1559, found: 513.1563.

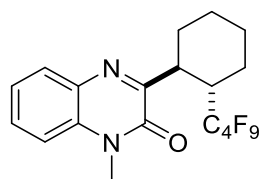

1-Methyl-3-(2-(4,4,4,4,4,4,4-nonafluoro-4λ<sup>12</sup>-buta-1,3-diyn-1-yl)cyclohexyl)quinoxalin-2(1*H*)-one (**4w**): According to the General Procedure, **4w** (49.0 mg, 53%) was prepared as a colorless oil. <sup>1</sup>H NMR (300 MHz, CDCl<sub>3</sub>) δ 7.83 (dd, *J* = 7.9, 1.5 Hz, 1H), 7.55 (ddd, *J* = 8.6, 7.4, 1.5 Hz, 1H), 7.41 – 7.29 (m, 2H), 3.82 – 3.66 (m, 1H), 3.73 (s, 3H), 3.51 – 3.25 (m, 1H), 2.16 – 1.43 (m, 8H); <sup>19</sup>F NMR (282 MHz, CDCl<sub>3</sub>) δ -80.95 (tt, *J* = 10.2, 2.9 Hz, 3F), -106.80 (dt, *J* = 279.4, 22.4 Hz, 2F), -

117.38 – -128.15 (m, 4F);  $^{13}\text{C}$  NMR (75 MHz,  $\text{CDCl}_3$ )  $\delta$  162.3, 154.2, 132.9, 132.6, 129.6, 123.5, 113.5, 41.70 (dd,  $J = 20.5, 16.5$  Hz), 39.2, 31.7, 29.1, 25.0, 24.9, 24.5,  $^{13}\text{C}$ -NMR for  $\text{CF}_2\text{CF}_2\text{CF}_2\text{CF}_3$  could not be assigned; FTIR (neat):  $\tilde{\nu} = 2937, 1653, 1603, 1474, 1232, 1212, 1131, 752, 738, 721$ ; HRMS (ESI): Calcd for  $[\text{C}_{19}\text{H}_{17}\text{F}_9\text{N}_2\text{O}+\text{Na}]^+$ : 483.1089, found: 483.1089.

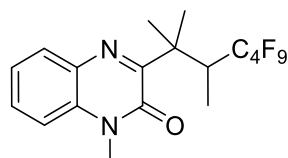

1-Methyl-3-(7,7,7,7,7,7,7,7-nonafluoro-2,3-dimethyl-7 $\lambda$ <sup>12</sup>-hepta-4,6-diyn-2-yl)quinoxalin-2(1H)-one (**4x**): According to the General Procedure, **4x** (38.5 mg, 43%) was prepared as a white solid.  $^1\text{H}$  NMR (300 MHz,  $\text{CDCl}_3$ )  $\delta$  7.77 (dd,  $J = 7.9, 1.5$  Hz, 1H), 7.50 – 7.40 (m, 1H), 7.31 – 7.18 (m, 2H), 4.37 – 4.12 (m, 1H), 3.60 (s, 3H), 1.49 (s, 3H), 1.41 (s, 3H), 1.12 (d,  $J = 7.1$  Hz, 3H);  $^{19}\text{F}$  NMR (282 MHz,  $\text{CDCl}_3$ )  $\delta$  -80.97 (tt,  $J = 10.2, 3.0$  Hz, 3F), -107.32 – -117.10 (m, 2F), -121.20 – -121.15 (m, 2F), -123.67 – -127.93 (m, 2F);  $^{13}\text{C}$  NMR (75 MHz,  $\text{CDCl}_3$ )  $\delta$  163.4, 153.8, 133.1, 132.1, 130.3, 129.7, 123.3, 113.3, 45.1, 38.22 (t,  $J = 18.75$  Hz), 28.8, 24.7, 21.9, 9.4,  $^{13}\text{C}$ -NMR for  $\text{CF}_2\text{CF}_2\text{CF}_2\text{CF}_3$  could not be assigned; FTIR (neat):  $\tilde{\nu} = 2987, 1652, 1604, 1232, 1217, 1166, 1131, 1081, 839, 752, 721$ ; HRMS (ESI): Calcd for  $[\text{C}_{18}\text{H}_{17}\text{F}_9\text{N}_2\text{O}+\text{Na}]^+$ : 471.1089, found: 471.1093.

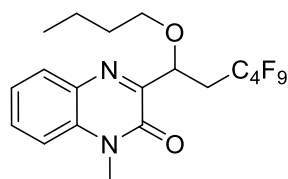

3-(1-Butoxy-6,6,6,6,6,6,6,6-nonafluoro-6 $\lambda$ <sup>12</sup>-hexa-3,5-diyn-1-yl)-1-methylquinoxalin-2(1H)-one (**4y**): According to the General Procedure, **4y** (93.5 mg, 98%) was prepared as a colorless oil.  $^1\text{H}$  NMR (300 MHz,  $\text{CDCl}_3$ )  $\delta$  7.88 (dd,  $J = 8.0, 1.5$  Hz, 1H), 7.52 (ddd,  $J = 8.7, 7.4, 1.5$  Hz, 1H), 7.25 – 7.33 (m, 2H), 5.28 (dd,  $J = 7.2, 4.9$  Hz, 1H), 3.74 – 3.37 (m, 2H), 3.65 (s, 3H), 3.06 – 2.40 (m, 2H), 1.61 – 1.20 (m,

4H), 0.93 – 0.73 (m, 3H);  $^{19}\text{F}$  NMR (282 MHz,  $\text{CDCl}_3$ )  $\delta$  -81.09 (tt,  $J = 9.7, 3.2$  Hz, 3F), -110.91 – -114.24 (m, 2F), -124.49 (dd,  $J = 17.7, 9.4$  Hz, 2F), -125.91 – -125.84 (m, 2F);  $^{13}\text{C}$  NMR (75 MHz,  $\text{CDCl}_3$ )  $\delta$  156.5, 154.2, 133.4, 132.4, 130.9, 130.7, 123.8, 113.6, 71.2, 70.6, 34.08 (t,  $J = 21.0$  Hz), 31.8, 29.0, 19.0, 13.7,  $^{13}\text{C}$ -NMR for  $\text{CF}_2\text{CF}_2\text{CF}_2\text{CF}_3$  could not be assigned; FTIR (neat):  $\tilde{\nu} = 2962, 1657, 1603, 1470, 1218, 1132, 1028, 882, 752$ ; HRMS (ESI): Calcd for  $[\text{C}_{19}\text{H}_{19}\text{F}_9\text{N}_2\text{O}_2+\text{Na}]^+$ : 501.1195, found: 501.1186.

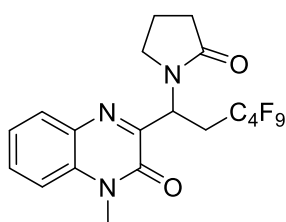

1-Methyl-3-(6,6,6,6,6,6,6,6-nonafluoro-1-(2-oxopyrrolidin-1-yl)-6 $\lambda$ <sup>12</sup>-hexa-3,5-diyn-1-yl)quinoxalin-2(1*H*)-one (**4z**): According to the General Procedure, **4z** (94.9 mg, 98%) was prepared as a colorless oil.  $^1\text{H}$  NMR (300 MHz,  $\text{CDCl}_3$ )  $\delta$  7.90 (dd,  $J = 8.0, 1.4$  Hz, 1H), 7.67 – 7.55 (m, 1H), 7.44 – 7.31 (m, 2H), 5.86 (dd,  $J = 9.1, 4.3$  Hz, 1H), 3.79 – 3.54 (m, 2H), 3.72 (s, 3H), 3.35 – 2.85 (m, 2H), 2.40 (t,  $J = 8.0$  Hz, 2H), 2.08 (dd,  $J = 14.4, 7.1$  Hz, 2H);  $^{19}\text{F}$  NMR (282 MHz,  $\text{CDCl}_3$ )  $\delta$  -81.02 (tt,  $J = 9.7, 3.1$  Hz, 3F), -112.87 – -115.47 (m, 2F), -124.00 – -124.64 (m, 2F), -125.53 – -126.06 (m, 2F);  $^{13}\text{C}$  NMR (75 MHz,  $\text{CDCl}_3$ )  $\delta$  175.0, 154.5, 153.6, 133.5, 131.9, 130.9, 130.5, 123.7, 113.6, 47.6, 46.0, 31.1, 29.3, 29.1, 18.6,  $^{13}\text{C}$ -NMR for  $\text{CF}_2\text{CF}_2\text{CF}_2\text{CF}_3$  could not be assigned; FTIR (neat):  $\tilde{\nu} = 2970, 1685, 1649, 1603, 1420, 1216, 1131, 1092, 879, 758, 734$ ; HRMS (ESI): Calcd for  $[\text{C}_{19}\text{H}_{16}\text{F}_9\text{N}_3\text{O}_2+\text{Na}]^+$ : 512.0991, found: 512.0987.

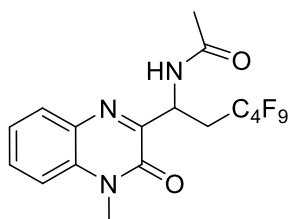

*N*-(6,6,6,6,6,6,6,6,6-nonafluoro-1-(4-methyl-3-oxo-3,4-dihydroquinoxalin-2-yl)-6 $\lambda$ <sup>12</sup>-hexa-3,5-diyne-1-yl)acetamide (**4aa**): According to the General Procedure, **4aa** (69.6 mg, 75%) was prepared as a colorless oil. <sup>1</sup>H NMR (300 MHz, CDCl<sub>3</sub>)  $\delta$  7.93 (dd, *J* = 8.0, 1.4 Hz, 1H), 7.69 – 7.59 (m, 1H), 7.48 – 7.35 (m, 2H), 7.07 (d, *J* = 8.2 Hz, 1H), 5.86 (dt, *J* = 8.2, 5.7 Hz, 1H), 3.75 (s, 3H), 3.13 – 2.88 (m, 2H), 2.11 (s, 3H); <sup>19</sup>F NMR (282 MHz, CDCl<sub>3</sub>)  $\delta$  -81.08 (tt, *J* = 9.7, 2.9 Hz, 3F), -111.04 – -114.82 (m, 2F), -124.21 – -124.72 (m, 2F), -125.92 (t, *J* = 10.9 Hz, 2F); <sup>13</sup>C NMR (75 MHz, CDCl<sub>3</sub>)  $\delta$  169.2, 155.1, 153.7, 133.2, 132.0, 131.0, 130.3, 124.1, 113.8, 47.1, 32.43 (t, *J* = 19.7 Hz), 29.0, 23.3, <sup>13</sup>C-NMR for CF<sub>2</sub>CF<sub>2</sub>CF<sub>2</sub>CF<sub>3</sub> could not be assigned; FTIR (neat):  $\tilde{\nu}$  = 3277, 1658, 1604, 1474, 1232, 1220, 1133, 881, 755; HRMS (ESI): Calcd for [C<sub>17</sub>H<sub>14</sub>F<sub>9</sub>N<sub>3</sub>O<sub>2</sub>+Na]<sup>+</sup>: 486.0835, found: 486.0860.

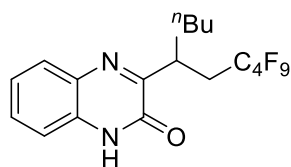

3-(10,10,10,10,10,10,10,10,10-Nonafluoro-10 $\lambda$ <sup>12</sup>-deca-7,9-diyne-5-yl)quinoxalin-2(1*H*)-one (**4ab**): According to the General Procedure, **4ab** (47.9 mg, 53%) was prepared as a white solid. <sup>1</sup>H NMR (300 MHz, CDCl<sub>3</sub>)  $\delta$  12.53 (s, 1H), 7.82 – 7.72 (m, 1H), 7.51 – 7.39 (m, 1H), 7.25 – 7.30 (m, 2H), 4.08 – 3.88 (m, 1H), 3.29 – 2.95 (m, 1H), 2.31 (dt, *J* = 26.7, 14.5 Hz, 1H), 1.90 – 1.59 (m, 2H), 1.18 – 1.36 (m, 4H), 0.80 (t, *J* = 6.9 Hz, 3H); <sup>19</sup>F NMR (282 MHz, CDCl<sub>3</sub>)  $\delta$  -81.07 (tt, *J* = 9.7, 3.1 Hz, 3F), -112.75 (dt, *J* = 25.4, 11.7 Hz, 2F), -124.27 – -124.72 (m, 2F), -125.84 – -125.93 (m, 2F); <sup>13</sup>C NMR (75 MHz, CDCl<sub>3</sub>)  $\delta$  161.6, 156.3, 132.7, 130.8, 130.1, 128.9, 124.2, 115.6, 34.2, 33.7, 32.94 (d, *J* = 21.7 Hz), 29.0, 22.5, 13.8, <sup>13</sup>C-NMR for CF<sub>2</sub>CF<sub>2</sub>CF<sub>2</sub>CF<sub>3</sub> could not be assigned; FTIR (neat):  $\tilde{\nu}$  = 2961, 1662, 1611, 1218, 1132, 1095, 877, 754, 721; HRMS (ESI): Calcd for [C<sub>18</sub>H<sub>17</sub>F<sub>9</sub>N<sub>2</sub>O+Na]<sup>+</sup>: 471.1089, found: 471.1094.

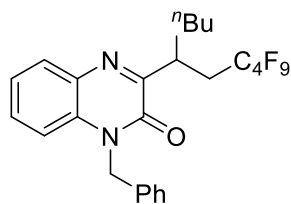

1-Benzyl-3-(10,10,10,10,10,10,10,10,10,10-nonafluoro-10 $\lambda$ <sup>12</sup>-deca-7,9-diyn-5-yl)quinoxalin-2(1*H*)-one (**4ac**): According to the General Procedure, **4ac** (101.1 mg, 94%) was prepared as a colorless oil. <sup>1</sup>H NMR (300 MHz, CDCl<sub>3</sub>)  $\delta$  7.76 (dd, *J* = 7.9, 1.5 Hz, 1H), 7.36 – 7.26 (m, 1H), 7.26 – 7.07 (m, 7H), 5.51 – 5.35 (m, 2H), 4.05 – 3.86 (m, 1H), 3.26 – 2.95 (m, 1H), 2.46 – 2.15 (m, 1H), 1.94 – 1.55 (m, 2H), 1.44 – 1.08 (m, 4H), 0.79 (t, *J* = 7.0 Hz, 3H); <sup>19</sup>F NMR (282 MHz, CDCl<sub>3</sub>)  $\delta$  -81.05 (tt, *J* = 9.7, 3.2 Hz, 3F), -111.45 – -113.93 (m, 2F), -124.27 – -124.74 (m, 2F), -125.91 – -125.83 (m, 2F); <sup>13</sup>C NMR (75 MHz, CDCl<sub>3</sub>)  $\delta$  161.3, 154.5, 135.2, 132.7, 132.3, 130.0, 129.9, 128.9, 127.6, 126.7, 123.6, 114.4, 45.8, 34.7, 34.2, 32.86 (t, *J* = 21.0 Hz), 29.2, 22.5, 13.8, <sup>13</sup>C-NMR for CF<sub>2</sub>CF<sub>2</sub>CF<sub>2</sub>CF<sub>3</sub> could not be assigned; FTIR (neat):  $\tilde{\nu}$  = 2933, 1653, 1604, 1217, 1132, 1096, 878, 751, 695; HRMS (ESI): Calcd for [C<sub>25</sub>H<sub>23</sub>F<sub>9</sub>N<sub>2</sub>O+Na]<sup>+</sup>: 561.1559, found: 561.1551.

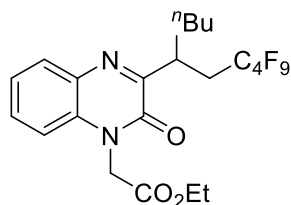

Ethyl 2-(3-(10,10,10,10,10,10,10,10,10,10-nonafluoro-10 $\lambda$ <sup>12</sup>-deca-7,9-diyn-5-yl)-2-oxoquinoxalin-1(2*H*)-yl)acetate (**4ad**): According to the General Procedure, **4ad** (98.0 mg, 92%) was prepared as a colorless oil. <sup>1</sup>H NMR (300 MHz, CDCl<sub>3</sub>)  $\delta$  7.78 (dd, *J* = 8.0, 1.5 Hz, 1H), 7.43 (ddd, *J* = 8.6, 7.4, 1.5 Hz, 1H), 7.31 – 7.22 (m, 1H), 7.00 (dd, *J* = 8.4, 0.8 Hz, 1H), 5.02 (d, *J* = 17.2 Hz, 1H), 4.89 (d, *J* = 17.2 Hz, 1H), 4.14 (q, *J* = 7.1 Hz, 2H), 3.83 – 3.92 (m, 1H), 3.26 – 2.86 (m, 1H), 2.43 – 2.13 (m, 1H), 1.58 – 1.82 (m, 2H), 1.28 – 1.08 (m, 7H), 0.79 (t, *J* = 9.1, 3H); <sup>19</sup>F NMR (282 MHz, CDCl<sub>3</sub>)  $\delta$  -81.11 (tt, *J* = 9.7, 3.1 Hz, 3F), -111.48 – -114.06 (m, 2F), -124.35 – -124.74 (m, 2F), -125.95 – -125.88 (m, 2F); <sup>13</sup>C NMR (75 MHz, CDCl<sub>3</sub>)  $\delta$  166.9, 161.0, 154.0, 132.5, 132.1,

130.2, 130.1, 123.8, 113.0, 62.0, 43.6, 34.5, 34.1, 32.6, 29.0, 22.5, 13.9, 13.7,  $^{13}\text{C}$ -NMR for  $\text{CF}_2\text{CF}_2\text{CF}_2\text{CF}_3$  could not be assigned; FTIR (neat):  $\tilde{\nu} = 2934, 1751, 1658, 1605, 1214, 1178, 1133, 1099, 1022, 878, 753, 721$ ; HRMS (ESI): Calcd for  $[\text{C}_{22}\text{H}_{23}\text{F}_9\text{N}_2\text{O}_3+\text{Na}]^+$ : 557.1457, found: 557.1458.

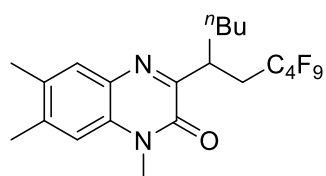

1,6,7-Trimethyl-3-(10,10,10,10,10,10,10,10,10,10-nonafluoro-10 $\lambda^{12}$ -deca-7,9-diyn-5-yl)quinoxalin-2(1*H*)-one (**4ae**): According to the General Procedure, **4ae** (94.2 mg, 96%) was prepared as a colorless oil.  $^1\text{H}$  NMR (300 MHz,  $\text{CDCl}_3$ )  $\delta$  7.51 (s, 1H), 6.99 (s, 1H), 3.82 – 3.90 (m, 1H), 3.60 (s, 3H), 3.19 – 2.91 (m, 1H), 2.35 (s, 3H), 2.29 – 2.08 (m, 1H), 2.26 (s, 3H), 1.87 – 1.49 (m, 2H), 1.33 – 1.11 (m, 4H), 0.78 (t,  $J = 6.9$  Hz, 3H);  $^{19}\text{F}$  NMR (282 MHz,  $\text{CDCl}_3$ )  $\delta$  -81.11 (tt,  $J = 9.7, 3.2$  Hz, 3F), -111.55 – -114.41 (m, 2F), -124.47 (dd,  $J = 18.4, 9.2$  Hz, 2F), -125.77 – -126.09 (m, 2F);  $^{13}\text{C}$  NMR (75 MHz,  $\text{CDCl}_3$ )  $\delta$  159.8, 154.4, 139.7, 132.4, 131.0, 130.9, 130.0, 114.1, 34.4, 34.1, 32.65 (t,  $J = 21.0$  Hz), 29.07, 29.04, 22.5, 20.4, 19.0, 13.8,  $^{13}\text{C}$ -NMR for  $\text{CF}_2\text{CF}_2\text{CF}_2\text{CF}_3$  could not be assigned; FTIR (neat):  $\tilde{\nu} = 2932, 1652, 1622, 1470, 1217, 1182, 1132, 1078, 1006, 880, 845, 734, 721$ ; HRMS (ESI): Calcd for  $[\text{C}_{21}\text{H}_{23}\text{F}_9\text{N}_2\text{O}+\text{Na}]^+$ : 513.1559, found: 513.1566.

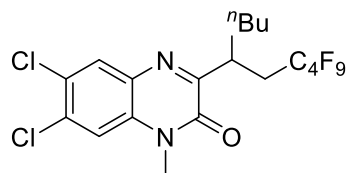

6,7-Dichloro-1-methyl-3-(10,10,10,10,10,10,10,10,10,10-nonafluoro-10 $\lambda^{12}$ -deca-7,9-diyn-5-yl)quinoxalin-2(1*H*)-one (**4af**): According to the General Procedure, **4af** (90.0 mg, 85%) was prepared as a colorless oil.  $^1\text{H}$  NMR (300 MHz,  $\text{CDCl}_3$ )  $\delta$  7.83 (s, 1H), 7.31 (s, 1H), 3.92 – 3.79 (m, 1H), 3.59 (s, 3H), 3.13 – 2.88 (m, 1H), 2.16 – 12.34 (m, 1H), 1.84 – 1.48 (m, 2H), 1.34 – 1.15 (m, 4H), 0.79 (t,  $J = 6.9$  Hz, 3H);  $^{19}\text{F}$  NMR (282

MHz, CDCl<sub>3</sub>) δ -81.10 (tt, *J* = 9.7, 3.2 Hz, 3F), -112.56 – -112.99 (m, 2F), -124.33 – -124.76 (m, 2F), -125.91 (t, *J* = 12.8 Hz, 2F); <sup>13</sup>C NMR (75 MHz, CDCl<sub>3</sub>) δ 162.8, 153.8, 134.1, 132.4, 131.4, 130.6, 127.4, 115.1, 34.5, 34.0, 32.57 (t, *J* = 21.0 Hz), 29.4, 29.0, 22.5, 13.7, <sup>13</sup>C-NMR for CF<sub>2</sub>CF<sub>2</sub>CF<sub>2</sub>CF<sub>3</sub> could not be assigned; FTIR (neat):  $\tilde{\nu}$  = 2933, 1662, 1599, 1465, 1217, 1181, 1132, 1094, 1019, 879, 845, 719; HRMS (ESI): Calcd for [C<sub>19</sub>H<sub>17</sub>C<sub>12</sub>F<sub>9</sub>N<sub>2</sub>O+Na]<sup>+</sup>: 553.0466, found: 553.0471.

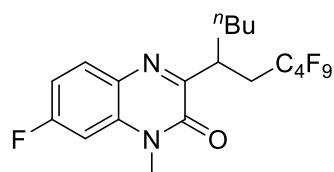

7-Fluoro-1-methyl-3-(10,10,10,10,10,10,10,10,10-nonafluoro-10λ<sup>12</sup>-deca-7,9-diyne-5-yl)quinoxalin-2(1*H*)-one (**4ag**): According to the General Procedure, **4ag** (75.0 mg, 78%) was prepared as a colorless oil. <sup>1</sup>H NMR (300 MHz, CDCl<sub>3</sub>) δ 7.83 (dd, *J* = 8.8, 6.0 Hz, 1H), 7.13 – 6.98 (m, 2H), 3.91 – 4.00 (m, 1H), 3.70 (s, 3H), 3.04 – 3.25 (m, 1H), 2.35 (dt, *J* = 15.1, 13.9 Hz, 1H), 1.98 – 1.58 (m, 2H), 1.44 – 1.23 (m, 4H), 0.89 (t, *J* = 6.9 Hz, 3H); <sup>19</sup>F NMR (282 MHz, CDCl<sub>3</sub>) δ -81.13 (tt, *J* = 9.7, 3.1 Hz, 3F), -107.74 (s, 1F), -111.57 – -114.28 (m, 2F), -124.32 – -124.85 (m, 2F), -125.96 (t, *J* = 11.1 Hz, 2F); <sup>13</sup>C NMR (75 MHz, CDCl<sub>3</sub>) δ 163.2 (d, *J* = 250.4 Hz), 159.9 (d, *J* = 3.5 Hz), 154.2, 134.46 (d, *J* = 11.6 Hz), 131.76 (d, *J* = 10.4 Hz), 129.20 (d, *J* = 2.2 Hz), 111.3 (d, *J* = 23.4 Hz), 100.5 (d, *J* = 27.8 Hz), 34.4, 34.0, 32.52 (t, *J* = 20.9 Hz), 29.3, 29.0, 22.5, 13.8, <sup>13</sup>C-NMR for CF<sub>2</sub>CF<sub>2</sub>CF<sub>2</sub>CF<sub>3</sub> could not be assigned; FTIR (neat):  $\tilde{\nu}$  = 2935, 1657, 1502, 1215, 1163, 1131, 1082, 877, 720; HRMS (ESI): Calcd for [C<sub>19</sub>H<sub>18</sub>F<sub>10</sub>N<sub>2</sub>O+Na]<sup>+</sup>: 503.1152, found: 503.1157.

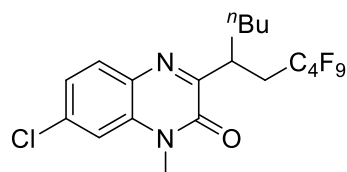

7-Chloro-1-methyl-3-(10,10,10,10,10,10,10,10,10-nonafluoro-10λ<sup>12</sup>-deca-7,9-diyne-5-yl)quinoxalin-2(1*H*)-one (**4ah**): According to the General Procedure, **4ah** (85.6 mg,

86%) was prepared as a colorless oil.  $^1\text{H}$  NMR (300 MHz,  $\text{CDCl}_3$ )  $\delta$  7.85 – 7.71 (m, 1H), 7.29 – 7.34 (m, 2H), 3.92 – 4.01 (m, 1H), 3.71 (s, 3H), 3.04 – 3.25 (m, 1H), 2.26 – 2.45 (m, 1H), 1.95 – 1.58 (m, 2H), 1.45 – 1.24 (m, 4H), 0.90 (t,  $J = 9.1$ , 3H);  $^{19}\text{F}$  NMR (282 MHz,  $\text{CDCl}_3$ )  $\delta$  -81.09 (tt,  $J = 9.7$ , 3.2 Hz, 3F), -111.59 – -114.11 (m, 2F), -124.20 – -124.79 (m, 2F), -125.73 – -126.19 (m, 2F);  $^{13}\text{C}$  NMR (75 MHz,  $\text{CDCl}_3$ )  $\delta$  161.3, 154.1, 135.9, 133.9, 130.9, 123.9, 113.6, 34.5, 34.0, 32.56 (t,  $J = 21.0$  Hz), 29.3, 29.0, 22.5, 13.8,  $^{13}\text{C}$ -NMR for  $\text{CF}_2\text{CF}_2\text{CF}_2\text{CF}_3$  could not be assigned; FTIR (neat):  $\tilde{\nu} = 2936$ , 1659, 1601, 1217, 1184, 1132, 1084, 877, 733, 720; HRMS (ESI): Calcd for  $[\text{C}_{19}\text{H}_{18}\text{ClF}_9\text{N}_2\text{O}+\text{Na}]^+$ : 519.0856, found: 519.0856.

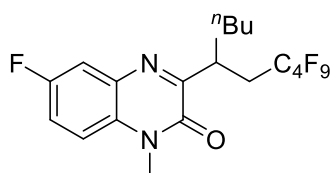

6-Fluoro-1-methyl-3-(10,10,10,10,10,10,10,10,10,10-nonafluoro-10 $\lambda$ <sup>12</sup>-deca-7,9-diyne-5-yl)quinoxalin-2(1H)-one (**4ai**): According to the General Procedure, **4ai** (68.0 mg, 71%) was prepared as a colorless oil.  $^1\text{H}$  NMR (300 MHz,  $\text{CDCl}_3$ )  $\delta$  7.60 – 7.51 (m, 1H), 7.34 – 7.27 (m, 2H), 4.06 – 3.92 (m, 1H), 3.74 (s, 3H), 3.30 – 2.97 (m, 1H), 2.51 – 2.22 (m, 1H), 1.97 – 1.60 (m, 2H), 1.42 – 1.16 (m, 4H), 0.90 (t,  $J = 6.9$  Hz, 3H);  $^{19}\text{F}$  NMR (282 MHz,  $\text{CDCl}_3$ )  $\delta$  -81.11 (tt,  $J = 9.7$ , 3.2 Hz, 3F), -112.76 (dt,  $J = 46.0$ , 12.7 Hz, 2F), -119.18 (s, 1F), -124.33 – -124.64 (m, 2F), -125.76 – -126.07 (m, 2F);  $^{13}\text{C}$  NMR (75 MHz,  $\text{CDCl}_3$ )  $\delta$  162.8, 158.6 (d,  $J = 242.3$  Hz), 154.0, 133.0 (d,  $J = 11.2$  Hz), 129.7, 117.6 (d,  $J = 24.0$  Hz), 115.3 (d,  $J = 22.5$  Hz), 114.6 (d,  $J = 8.7$  Hz), 34.6, 34.0, 32.5 (t,  $J = 21.0$  Hz), 29.4, 29.0, 22.5, 13.7,  $^{13}\text{C}$ -NMR for  $\text{CF}_2\text{CF}_2\text{CF}_2\text{CF}_3$  could not be assigned; FTIR (neat):  $\tilde{\nu} = 2937$ , 1654, 1502, 1217, 1162, 1130, 1089, 877, 810, 720; HRMS (ESI): Calcd for  $[\text{C}_{19}\text{H}_{18}\text{F}_{10}\text{N}_2\text{O}+\text{Na}]^+$ : 503.1152, found: 503.1160.

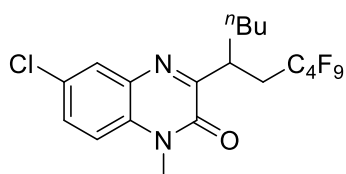



6-Chloro-1-methyl-3-(10,10,10,10,10,10,10,10,10-nonafluoro-10 $\lambda$ <sup>12</sup>-deca-7,9-diyn-5-yl)quinoxalin-2(1*H*)-one (**4aj**): According to the General Procedure, **4aj** (78.9 mg, 80%) was prepared as a colorless oil. <sup>1</sup>H NMR (300 MHz, CDCl<sub>3</sub>)  $\delta$  7.76 (d, *J* = 2.4 Hz, 1H), 7.42 (dd, *J* = 8.9, 2.4 Hz, 1H), 7.15 – 7.19 (m, 1H), 3.95 – 3.83 (m, 1H), 3.62 (s, 3H), 2.94 – 3.15 (m, 1H), 2.38 – 2.10 (m, 1H), 1.86 – 1.53 (m, 2H), 1.33 – 1.16 (m, 4H), 0.79 (t, *J* = 6.9 Hz, 3H); <sup>19</sup>F NMR (282 MHz, CDCl<sub>3</sub>)  $\delta$  -81.08 (tt, *J* = 9.7, 3.2 Hz, 3F), -111.56 – -114.16 (m, 2F), -124.27 – -124.66 (m, 2F), -125.90 (dd, *J* = 12.6, 9.8 Hz, 2F); <sup>13</sup>C NMR (75 MHz, CDCl<sub>3</sub>)  $\delta$  162.7, 154.0, 132.9, 131.7, 129.9, 129.2, 128.9, 114.7, 34.5, 34.0, 32.5, 29.3, 29.0, 22.5, 13.8, <sup>13</sup>C-NMR for CF<sub>2</sub>CF<sub>2</sub>CF<sub>2</sub>CF<sub>3</sub> could not be assigned; FTIR (neat):  $\tilde{\nu}$  = 2934, 1657, 1491, 1216, 1182, 1132, 1096, 879, 808, 719; HRMS (ESI): Calcd for [C<sub>19</sub>H<sub>18</sub>ClF<sub>9</sub>N<sub>2</sub>O+Na]<sup>+</sup>: 519.0856, found: 519.0857.

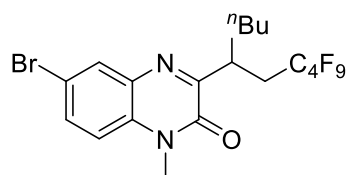

6-Bromo-1-methyl-3-(10,10,10,10,10,10,10,10,10-nonafluoro-10 $\lambda$ <sup>12</sup>-deca-7,9-diyn-5-yl)quinoxalin-2(1*H*)-one (**4ak**): According to the General Procedure, **4ak** (70 mg, 65%) was prepared as a white solid. <sup>1</sup>H NMR (300 MHz, CDCl<sub>3</sub>)  $\delta$  7.91 (d, *J* = 2.6 Hz, 1H), 7.55 (dd, *J* = 8.9, 2.3 Hz, 1H), 7.10 (d, *J* = 8.9 Hz, 1H), 3.94 – 3.80 (m, 1H), 3.62 (s, 3H), 2.93 – 3.14 (m, 1H), 2.40 – 2.11 (m, 1H), 1.85 – 1.54 (m, 2H), 1.31 – 1.15 (m, 4H), 0.79 (t, *J* = 6.9 Hz, 3H); <sup>19</sup>F NMR (282 MHz, CDCl<sub>3</sub>)  $\delta$  -81.08 (tt, *J* = 9.7, 3.2 Hz, 3F), -111.56 – -114.18 (m, 2F), -124.30 – -124.65 (m, 2F), -125.92 (dd, *J* = 17.6, 7.7 Hz, 2F); <sup>13</sup>C NMR (75 MHz, CDCl<sub>3</sub>)  $\delta$  162.6, 154.0, 133.2, 132.7, 132.3, 132.1, 116.1, 115.0, 34.5, 34.1, 32.56 (t, *J* = 21.0 Hz), 29.3, 29.0, 22.5, 13.8, <sup>13</sup>C-NMR for CF<sub>2</sub>CF<sub>2</sub>CF<sub>2</sub>CF<sub>3</sub> could not be assigned; FTIR (neat):  $\tilde{\nu}$  = 2936, 1657, 1487, 1217, 1133, 1093, 879, 806, 718; HRMS (ESI): Calcd for [C<sub>19</sub>H<sub>18</sub>BrF<sub>9</sub>N<sub>2</sub>O+Na]<sup>+</sup>: 563.0351, found: 563.0357.

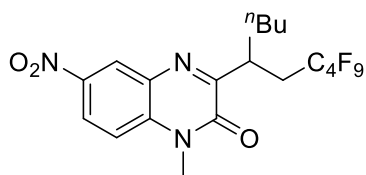

1-Methyl-6-nitro-3-(10,10,10,10,10,10,10,10,10-nonafluoro-10 $\lambda$ <sup>12</sup>-deca-7,9-diyn-5-yl)quinoxalin-2(1*H*)-one (**4al**): According to the General Procedure, **4al** (41.6 mg, 41%) was prepared as a yellow solid. <sup>1</sup>H NMR (300 MHz, CDCl<sub>3</sub>)  $\delta$  8.64 (d, *J* = 2.6 Hz, 1H), 8.32 (dd, *J* = 9.2, 2.6 Hz, 1H), 7.34 (d, *J* = 9.2 Hz, 1H), 3.98 – 3.84 (m, 1H), 3.70 (s, 3H), 3.20 – 2.92 (m, 1H), 2.40 – 2.12 (m, 1H), 1.88 – 1.54 (m, 2H), 1.35 – 1.15 (m, 4H), 0.80 (t, *J* = 6.9 Hz, 3H); <sup>19</sup>F NMR (282 MHz, CDCl<sub>3</sub>)  $\delta$  -81.06 (tt, *J* = 9.7, 3.1 Hz, 3F), -112.69 (d, *J* = 6.6 Hz, 2F), -124.48 – -124.38 (m, 2F), -125.68 – -126.17 (m, 2F); <sup>13</sup>C NMR (75 MHz, CDCl<sub>3</sub>)  $\delta$  164.1, 153.9, 143.4, 137.6, 131.5, 125.5, 124.5, 114.2, 34.5, 34.1, 32.60 (t, *J* = 20.5 Hz), 29.8, 29.0, 22.4, 13.7, <sup>13</sup>C-NMR for CF<sub>2</sub>CF<sub>2</sub>CF<sub>2</sub>CF<sub>3</sub> could not be assigned; FTIR (neat):  $\tilde{\nu}$  = 2961, 1667, 1614, 1341, 1218, 1132, 1077, 820, 727; HRMS (ESI): Calcd for [C<sub>19</sub>H<sub>18</sub>F<sub>9</sub>N<sub>3</sub>O<sub>3</sub>+Na]<sup>+</sup>: 530.1097, found: 530.1091.

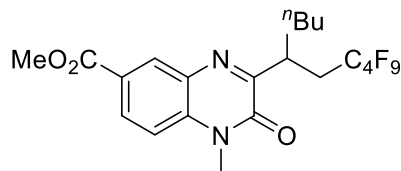

Methyl 1-methyl-3-(10,10,10,10,10,10,10,10,10-nonafluoro-10 $\lambda$ <sup>12</sup>-deca-7,9-diyn-5-yl)-2-oxo-1,2-dihydroquinoxaline-6-carboxylate (**4am**): According to the General Procedure, **4am** (74.0 mg, 71%) was prepared as a white solid. <sup>1</sup>H NMR (300 MHz, CDCl<sub>3</sub>)  $\delta$  8.43 (d, *J* = 2.0 Hz, 1H), 8.12 (dd, *J* = 8.8, 2.0 Hz, 1H), 7.27 (d, *J* = 8.8 Hz, 1H), 3.96 – 3.84 (m, 1H), 3.89 (s, 3H), 3.66 (s, 3H), 3.22 – 2.88 (m, 1H), 2.42 – 2.08 (m, 1H), 1.87 – 1.51 (m, 2H), 1.17 – 1.26 (m, 4H), 0.79 (t, *J* = 6.9 Hz, 3H); <sup>19</sup>F NMR (282 MHz, CDCl<sub>3</sub>)  $\delta$  -81.09 (tt, *J* = 9.7, 3.2 Hz, 3F), -111.58 – -114.19 (m, 2F), -124.32 – -124.68 (m, 2F), -125.92 (t, *J* = 11.3 Hz, 2F); <sup>13</sup>C NMR (75 MHz, CDCl<sub>3</sub>)  $\delta$  166.0, 162.2, 154.3, 136.3, 131.7, 131.6, 130.7, 125.5, 113.6, 52.2, 34.4, 34.1, 32.56 (t, *J* = 21.0 Hz), 29.4, 29.0, 22.5, 13.7, <sup>13</sup>C-NMR for CF<sub>2</sub>CF<sub>2</sub>CF<sub>2</sub>CF<sub>3</sub> could not be assigned;

FTIR (neat):  $\tilde{\nu}$  = 2959, 1723, 1662, 1611, 1437, 1286, 1215, 1132, 1105, 878, 766, 734;

HRMS (ESI): Calcd for  $[\text{C}_{21}\text{H}_{21}\text{F}_9\text{N}_2\text{O}_3+\text{Na}]^+$ : 543.1301, found: 543.1310.

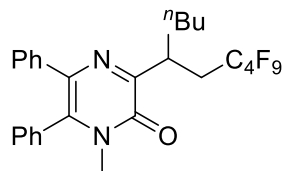

1-Methyl-3-(10,10,10,10,10,10,10,10,10,10-nonafluoro-10 $\lambda$ <sup>12</sup>-deca-7,9-diyne-5-yl)-5,6-diphenylpyrazin-2(1*H*)-one (**4an**): According to the General Procedure, **4an** (101.6 mg, 90%) was prepared as a colorless oil. <sup>1</sup>H NMR (300 MHz, CDCl<sub>3</sub>)  $\delta$  7.52 – 7.31 (m, 4H), 7.16 – 7.20 (m, 6H), 3.91 – 3.99 (m, 1H), 3.37 (s, 3H), 3.10 – 3.32 (m, 1H), 2.53 – 2.22 (m, 1H), 2.01 – 1.61 (m, 2H), 1.51 – 1.29 (m, 4H), 0.94 (t,  $J$  = 6.9 Hz, 3H); <sup>19</sup>F NMR (282 MHz, CDCl<sub>3</sub>)  $\delta$  -81.03 (tt,  $J$  = 9.7, 3.1 Hz, 3F), -111.43 – -114.47 (m, 2F), -124.43 (dd,  $J$  = 17.7, 8.7 Hz, 2F), -125.68 – -126.11 (m, 2F); <sup>13</sup>C NMR (75 MHz, CDCl<sub>3</sub>)  $\delta$  157.7, 155.1, 137.8, 136.7, 132.6, 131.9, 130.1, 129.4, 129.2, 128.9, 127.6, 126.8, 34.3, 34.0, 33.9, 32.14 (t,  $J$  = 21.0 Hz), 29.2, 22.6, 13.9, <sup>13</sup>C-NMR for CF<sub>2</sub>CF<sub>2</sub>CF<sub>2</sub>CF<sub>3</sub> could not be assigned; FTIR (neat):  $\tilde{\nu}$  = 2959, 1647, 1586, 1417, 1216, 1131, 877, 703; HRMS (ESI): Calcd for  $[\text{C}_{27}\text{H}_{25}\text{F}_9\text{N}_2\text{O}+\text{Na}]^+$ : 587.1715, found: 587.1741.

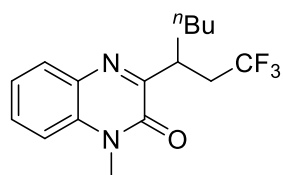

1-Methyl-3-(1,1,1-trifluoroheptan-3-yl)quinoxalin-2(1*H*)-one (**4ao**): According to the General Procedure, **4ao** (52.0mg, 83%) was prepared as a colorless oil. <sup>1</sup>H NMR (300 MHz, CDCl<sub>3</sub>)  $\delta$  7.77 (dd,  $J$  = 8.0, 1.5 Hz, 1H), 7.51 – 7.42 (m, 1H), 7.22 – 7.29 (m, 2H), 3.82 – 3.69 (m, 1H), 3.63 (s, 3H), 2.90 – 3.03 (m, 1H), 2.24 – 2.42 (m, 1H), 1.84 – 1.55 (m, 2H), 1.32 – 1.13 (m, 4H), 0.78 (t,  $J$  = 6.9 Hz, 3H); <sup>19</sup>F NMR (282 MHz, CDCl<sub>3</sub>)  $\delta$  -64.39 (s); <sup>13</sup>C NMR (75 MHz, CDCl<sub>3</sub>)  $\delta$  160.9, 154.4, 133.0, 132.5, 129.99, 129.96, 126.9 (q,  $J$  = 277.5), 123.5, 113.5, 36.0, 35.8 (q,  $J$  = 27.7 Hz), 33.5, 29.1, 29.0,

22.5, 13.8,  $^{13}\text{C}$ -NMR for  $\text{CF}_2\text{CF}_2\text{CF}_2\text{CF}_3$  could not be assigned; FTIR (neat):  $\tilde{\nu} = 2959$ , 2933, 1653, 1603, 1474, 1258, 1149, 1118, 1086, 754; HRMS (ESI): Calcd for  $[\text{C}_{16}\text{H}_{19}\text{F}_3\text{N}_2\text{O}+\text{Na}]^+$ : 335.1342, found: 335.1354.

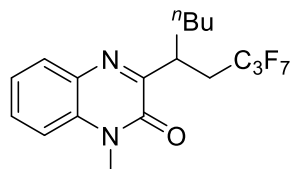

3-(1,1,1,1,1,1-Heptafluoro-1 $\lambda^8$ -non-2-yn-5-yl)-1-methylquinoxalin-2(1*H*)-one (**4ap**): According to the General Procedure, **4ap** (79.1 mg, 96%) was prepared as a colorless oil.  $^1\text{H}$  NMR (300 MHz,  $\text{CDCl}_3$ )  $\delta$  7.87 (dd,  $J = 7.9, 1.5$  Hz, 1H), 7.62 – 7.51 (m, 1H), 7.32 – 7.40 (m, 2H), 3.95 – 4.04 (m, 1H), 3.75 (s, 3H), 3.33 – 3.02 (m, 1H), 2.51 – 2.22 (m, 1H), 2.00 – 1.64 (m, 2H), 1.45 – 1.27 (m, 4H), 0.90 (t,  $J = 6.9$  Hz, 3H);  $^{19}\text{F}$  NMR (282 MHz,  $\text{CDCl}_3$ )  $\delta$  -80.47 (t,  $J = 9.7$  Hz, 3F), -112.28 – -114.85 (m, 2F), -127.81 (s, 2F);  $^{13}\text{C}$  NMR (75 MHz,  $\text{CDCl}_3$ )  $\delta$  161.1, 154.4, 133.0, 132.4, 129.98, 129.92, 123.5, 113.5, 34.5, 34.0, 32.4 (t,  $J = 21.0$  Hz), 29.1, 29.0, 22.5, 13.8,  $^{13}\text{C}$ -NMR for  $\text{CF}_2\text{CF}_2\text{CF}_2\text{CF}_3$  could not be assigned; FTIR (neat):  $\tilde{\nu} = 2936$ , 1653, 1603, 1474, 1352, 1218, 1170, 1110, 1086, 752, 729; HRMS (ESI): Calcd for  $[\text{C}_{18}\text{H}_{19}\text{F}_7\text{N}_2\text{O}+\text{Na}]^+$ : 453.1278, found: 453.1268.

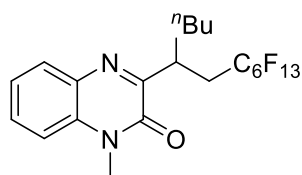

1-Methyl-3-(12,12,12,12,12,12,12,12,12,12,12,12-tridecafluoro-12 $\lambda^{16}$ -dodeca-7,9,11-triyn-5-yl)quinoxalin-2(1*H*)-one (**4aq**): According to the General Procedure, **4aq** (102 mg, 95%) was prepared as a colorless oil.  $^1\text{H}$  NMR (300 MHz,  $\text{CDCl}_3$ )  $\delta$  7.75 (dd,  $J = 7.9, 1.5$  Hz, 1H), 7.51 – 7.40 (m, 1H), 7.21 – 7.28 (m, 2H), 3.85 – 3.93 (m, 1H), 3.63 (s, 3H), 3.22 – 2.93 (m, 1H), 2.22 – 2.31 (m, 1H), 1.87 – 1.51 (m, 2H), 1.30 – 1.13 (m, 4H), 0.78 (t,  $J = 6.9$  Hz, 3H);  $^{19}\text{F}$  NMR (282 MHz,  $\text{CDCl}_3$ )  $\delta$  -80.92 (tt,  $J = 10.0, 2.5$  Hz, 3F), -111.34 – -113.94 (m, 2F), -121.81 (s, 2F), -122.88 (s, 2F), -123.29 – -

124.00 (m, 2F), -125.99 – -126.37 (m, 2F);  $^{13}\text{C}$  NMR (75 MHz,  $\text{CDCl}_3$ )  $\delta$  161.1, 154.4, 133.0, 132.5, 129.94, 129.91, 123.5, 113.5, 34.5, 34.1, 32.69 (t,  $J = 21.0$  Hz), 29.1, 29.0, 22.5, 13.7,  $^{13}\text{C}$ -NMR for  $\text{CF}_2\text{CF}_2\text{CF}_2\text{CF}_3$  could not be assigned; FTIR (neat):  $\tilde{\nu} = 2960$ , 1655, 1604, 1234, 1189, 1143, 1120, 1087, 752, 731, 707; HRMS (ESI): Calcd for  $[\text{C}_{21}\text{H}_{19}\text{F}_{13}\text{N}_2\text{O}+\text{Na}]^+$ : 585.1182, found: 585.1193.

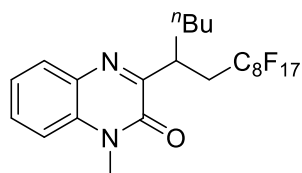

3-(14,14,14,14,14,14,14,14,14,14,14,14,14,14,14,14-Heptafluoro-14 $\lambda^{20}$ -tetradeca-7,9,11,13-tetrayn-5-yl)-1-methylquinoxalin-2(1*H*)-one (**4ar**): According to the General Procedure, **4ar** (112.5 mg, 85%) was prepared as a colorless oil.  $^1\text{H}$  NMR (300 MHz,  $\text{CDCl}_3$ )  $\delta$  7.76 (dd,  $J = 7.9, 1.5$  Hz, 1H), 7.50 – 7.42 (m, 1H), 7.30 – 7.20 (m, 2H), 3.85 – 3.92 (m, 1H), 3.64 (s, 3H), 3.05 – 3.10 (m, 1H), 2.43 – 2.12 (m, 1H), 1.87 – 1.51 (m, 2H), 1.34 – 1.13 (m, 4H), 0.79 (t,  $J = 6.9$  Hz, 3H);  $^{19}\text{F}$  NMR (282 MHz,  $\text{CDCl}_3$ )  $\delta$  -80.77 – -80.97 (m, 3F), -111.07 – -113.85 (m, 2F), -121.75 (d,  $J = 88.3$  Hz, 6F), -122.72 (s, 2F), -123.53 (s, 2F), -126.14 (t,  $J = 12.8$  Hz, 2F);  $^{13}\text{C}$  NMR (75 MHz,  $\text{CDCl}_3$ )  $\delta$  161.1, 154.4, 133.0, 132.5, 129.95, 129.92, 123.5, 113.5, 34.5, 34.1, 32.71 (t,  $J = 21.0$  Hz), 29.1, 29.0, 22.5, 13.7,  $^{13}\text{C}$ -NMR for  $\text{CF}_2\text{CF}_2\text{CF}_2\text{CF}_3$  could not be assigned; FTIR (neat):  $\tilde{\nu} = 2936$ , 1655, 1604, 1474, 1237, 1200, 1145, 1088, 752, 734, 656; HRMS (ESI): Calcd for  $[\text{C}_{23}\text{H}_{19}\text{F}_{17}\text{N}_2\text{O}+\text{Na}]^+$ : 685.1118, found: 685.1129.

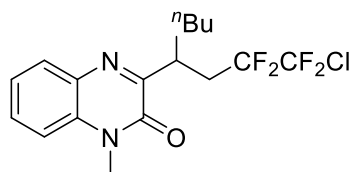

3-(1-Chloro-1,1,2,2-tetrafluorooctan-4-yl)-1-methylquinoxalin-2(1*H*)-one (**4as**): According to the General Procedure, **4as** (54.0 mg, 71%) was prepared as a colorless oil.  $^1\text{H}$  NMR (300 MHz,  $\text{CDCl}_3$ )  $\delta$  7.87 (dd,  $J = 7.9, 1.5$  Hz, 1H), 7.57 (ddd,  $J = 8.6, 7.4, 1.5$  Hz, 1H), 7.42 – 7.30 (m, 2H), 3.94 – 4.03 (m, 1H), 3.75 (s, 3H), 3.30 – 3.02 (m,

1H), 2.52 – 2.26 (m, 1H), 1.98 – 1.60 (m, 2H), 1.46 – 1.22 (m, 4H), 0.89 (t,  $J = 6.9$  Hz, 3H);  $^{19}\text{F}$  NMR (282 MHz,  $\text{CDCl}_3$ )  $\delta$  -71.21 – -71.18 (m, 2F), -111.16 – -113.42 (m, 2F);  $^{13}\text{C}$  NMR (75 MHz,  $\text{CDCl}_3$ )  $\delta$  161.2, 154.4, 133.0, 132.5, 129.95, 129.92, 123.5, 113.5, 35.0, 34.0, 32.54 (t,  $J = 21.0$  Hz), 29.1, 29.0, 22.5, 13.8,  $^{13}\text{C}$ -NMR for  $\text{CF}_2\text{CF}_2\text{CF}_2\text{CF}_3$  could not be assigned; FTIR (neat):  $\tilde{\nu} = 2960, 1655, 1603, 1474, 1150, 1084, 936, 753$ ; HRMS (ESI): Calcd for  $[\text{C}_{17}\text{H}_{19}\text{ClF}_4\text{N}_2\text{O}+\text{Na}]^+$ : 401.1014, found: 401.1022.

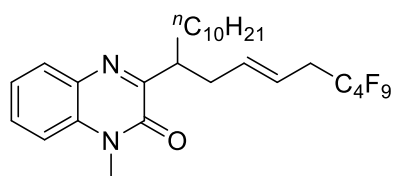

(*E*)-1-Methyl-3-(1,1,1,1,1,1,1,1-nonafluoro-1 $\lambda^{12}$ -nonadeca-6-en-1,3-diyn-9-yl)quinoxalin-2(1*H*)-one (**6**): According to the General Procedure, **6** (16.4 mg, 14%) was prepared as a colorless oil.  $^1\text{H}$  NMR (300 MHz,  $\text{CDCl}_3$ )  $\delta$  7.79 (dd,  $J = 8.0, 1.4$  Hz, 1H), 7.49 – 7.42 (m, 1H), 7.31 – 7.19 (m, 2H), 5.64 (dt,  $J = 14.6, 7.1$  Hz, 1H), 5.36 – 5.19 (m, 1H), 3.61 (s, 3H), 3.48 – 3.58 (m, 1H), 2.36 – 2.69 (m, 3H), 1.88 – 1.49 (m, 3H), 1.15 -1.19 (m, 16H), 0.79 (t,  $J = 6.7$  Hz, 3H);  $^{19}\text{F}$  NMR (282 MHz,  $\text{CDCl}_3$ )  $\delta$  -81.09 (tt,  $J = 9.5, 3.3$  Hz, 3F), -113.66 – -113.48 (m, 2F), -123.85 – -124.35 (m, 2F), -126.18 – -126.04 (m, 2F);  $^{13}\text{C}$  NMR (75 MHz,  $\text{CDCl}_3$ )  $\delta$  163.0, 154.8, 136.9, 132.8, 132.6, 129.7, 129.6, 123.4, 117.9, 113.4, 41.2, 36.3, 34.68 (t,  $J = 21.7$  Hz), 32.8, 31.8, 29.7, 29.5, 29.4, 29.3, 29.0, 27.3, 22.6, 14.0,  $^{13}\text{C}$ -NMR for  $\text{CF}_2\text{CF}_2\text{CF}_2\text{CF}_3$  could not be assigned; FTIR (neat):  $\tilde{\nu} = 2929, 2857, 1657, 1603, 1474, 1234, 1134, 752$ ; HRMS (ESI): Calcd for  $[\text{C}_{28}\text{H}_{35}\text{F}_9\text{N}_2\text{O}+\text{Na}]^+$ : 609.2458, found: 609.2501.

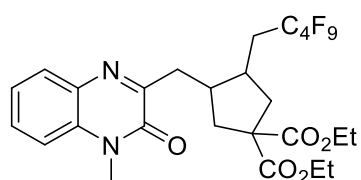

Diethyl 3-((4-methyl-3-oxo-3,4-dihydroquinoxalin-2-yl)methyl)-4-(5,5,5,5,5,5,5,5-nonafluoro-5 $\lambda^{12}$ -penta-2,4-diyn-1-yl)cyclopentane-1,1-dicarboxylate (**8**): According to the General Procedure, **8** (24.5 mg, 20%, dr = 22:1) was prepared as a colorless oil.  $^1\text{H}$

NMR (300 MHz, CDCl<sub>3</sub>) δ 7.83 (dd, *J* = 7.9, 1.3 Hz, 1H), 7.56 (ddd, *J* = 8.7, 7.4, 1.5 Hz, 1H), 7.40 – 7.30 (m, 2H), 4.31 – 4.12 (m, 4H), 3.72 (s, 3H), 3.06 – 2.79 (m, 3H), 2.69 – 2.05 (m, 7H), 1.27 (td, *J* = 6.9, 1.8 Hz, 6H); <sup>19</sup>F NMR (282 MHz, CDCl<sub>3</sub>) δ -81.05 (tt, *J* = 9.6, 3.2 Hz, 3F), -111.62 – -115.01 (m, 2F), -124.35 (d, *J* = 9.1 Hz, 2F), -125.85 (dd, *J* = 13.9, 8.6 Hz, 2F); <sup>13</sup>C NMR (75 MHz, CDCl<sub>3</sub>) δ 172.4, 172.3, 170.4, 158.8, 154.8, 133.0, 132.6, 129.8, 123.6, 113.5, 61.62, 61.55, 58.7, 39.6, 39.0, 38.6, 34.7, 33.4, 29.0, 13.9, <sup>13</sup>C-NMR for CF<sub>2</sub>CF<sub>2</sub>CF<sub>2</sub>CF<sub>3</sub> could not be assigned; FTIR (neat):  $\tilde{\nu}$  = 1644, 1601, 1474, 1318, 1159, 1069, 755, 731; HRMS (ESI): Calcd for [C<sub>26</sub>H<sub>27</sub>F<sub>9</sub>N<sub>2</sub>O<sub>5</sub>+Na]<sup>+</sup>: 641.1668, found: 641.1683.

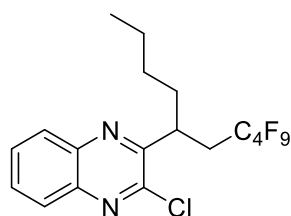

2-Chloro-3-(10,10,10,10,10,10,10,10,10,10-nonafluoro-10λ<sup>12</sup>-deca-7,9-diyne-5-yl)quinoxaline (**9**): **9** was prepared with the reaction of **4ab** (448.0 mg, 1mmol), POCl<sub>3</sub> (0.11 mL, 1.2 mmol), and pyridine (0.08 mL, 1.0 mL, 1.0 mmol) under 160 °C for 2 hours. <sup>1</sup>H NMR (300 MHz, CDCl<sub>3</sub>) δ 8.13 – 8.01 (m, 2H), 7.76 – 7.80 (M, 2H), 4.17 – 4.04 (m, 1H), 3.17 – 3.38 (m, 1H), 2.60 – 2.35 (m, 1H), 2.00 – 1.71 (m, 2H), 1.49 – 1.15 (m, 4H), 0.89 (t, *J* = 7.1 Hz, 3H); <sup>19</sup>F NMR (282 MHz, CDCl<sub>3</sub>) δ -81.19 (tt, *J* = 9.7, 3.1 Hz, 3F), -111.37 – -114.39 (m, 2F), -124.57 (dd, *J* = 17.7, 9.3 Hz, 2F), -126.02 (t, *J* = 10.4 Hz, 2F); <sup>13</sup>C NMR (75 MHz, CDCl<sub>3</sub>) δ 156.4, 147.2, 140.9, 140.8, 130.4, 130.1, 128.7, 128.1, 35.7, 35.5, 33.98 (t, *J* = 21.0 Hz), 28.8, 22.4, 13.7, <sup>13</sup>C-NMR for CF<sub>2</sub>CF<sub>2</sub>CF<sub>2</sub>CF<sub>3</sub> could not be assigned; FTIR (neat):  $\tilde{\nu}$  = 2935, 1353, 1217, 1185, 1129, 1035, 878, 760, 719, 596; HRMS (ESI): Calcd for [C<sub>18</sub>H<sub>16</sub>ClF<sub>9</sub>N<sub>2</sub>+Na]<sup>+</sup>: 489.0751, found: 489.0759.





Jul07-2018  
 zdq-e71003-2  
 f19cpd CDC13 /opt/topspin av1 38

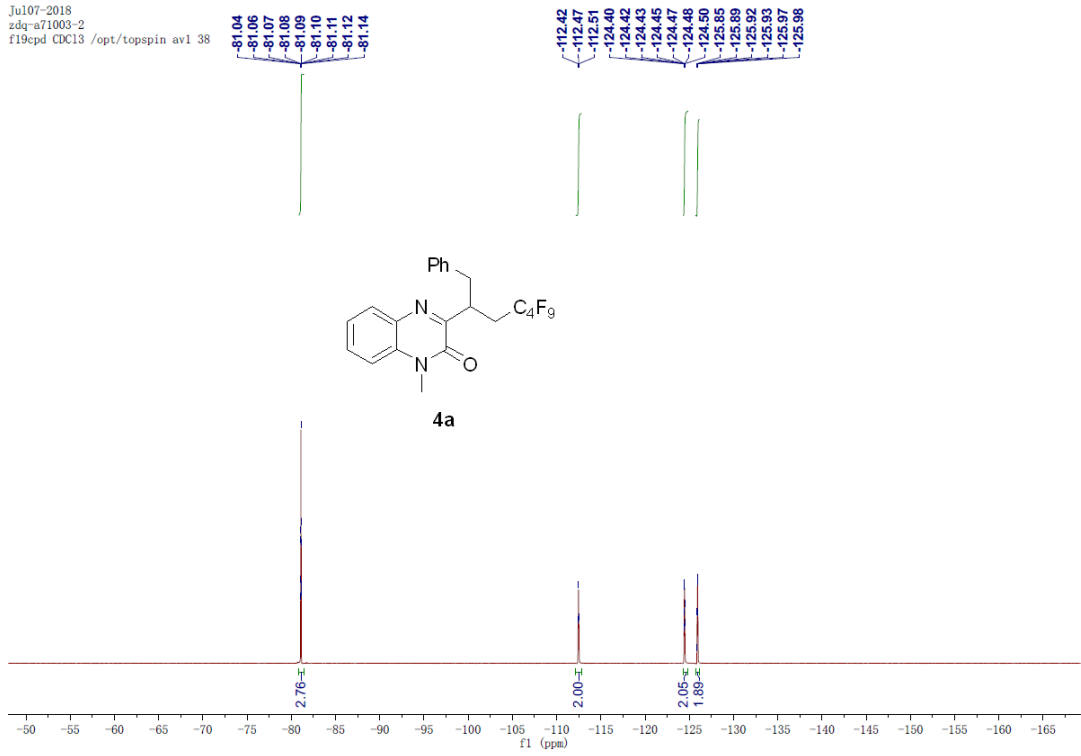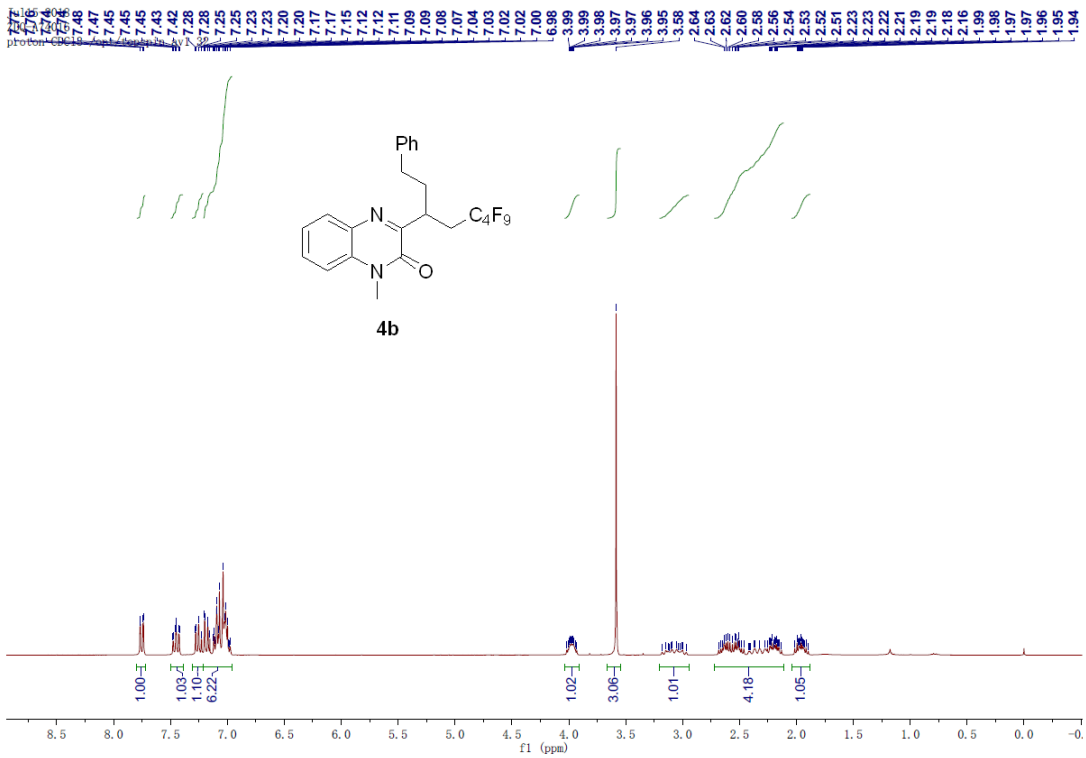

Jul15-2018  
ZDQ-A74016  
carbon CDC13 /opt/topspin av1

160.62  
154.38  
141.29  
133.11  
132.49  
130.12  
129.97  
128.36  
128.23  
125.83  
123.60  
113.56

35.76  
35.00  
33.36  
33.17  
32.69  
29.12

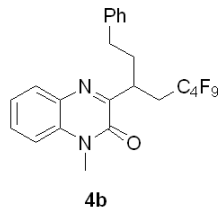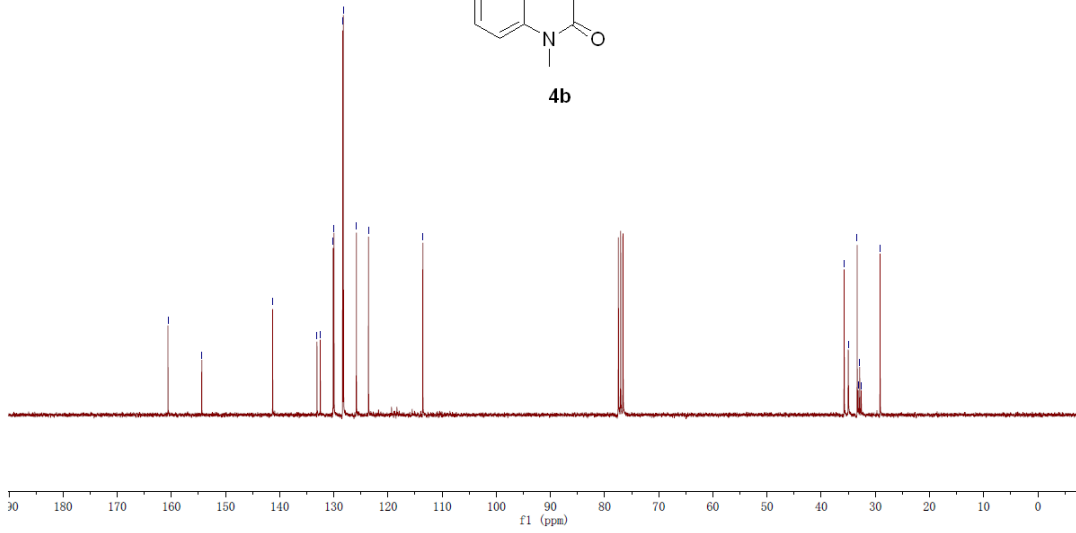

Jul15-2018  
ZDQ-A74016  
F19cpd CDC13 /opt/topspin av1 32

-81.00  
-81.02  
-81.03  
-81.04  
-81.05  
-81.06  
-81.07  
-81.08  
-81.10  
-111.57  
-111.61  
-111.66  
-112.52  
-112.57  
-112.62  
-112.82  
-112.91  
-112.91  
-113.78  
-113.82  
-113.87  
-124.38  
-124.41  
-124.44  
-124.47  
-125.78  
-125.81  
-125.85  
-125.89  
-125.92

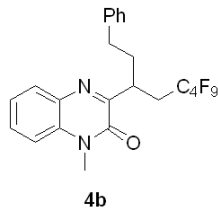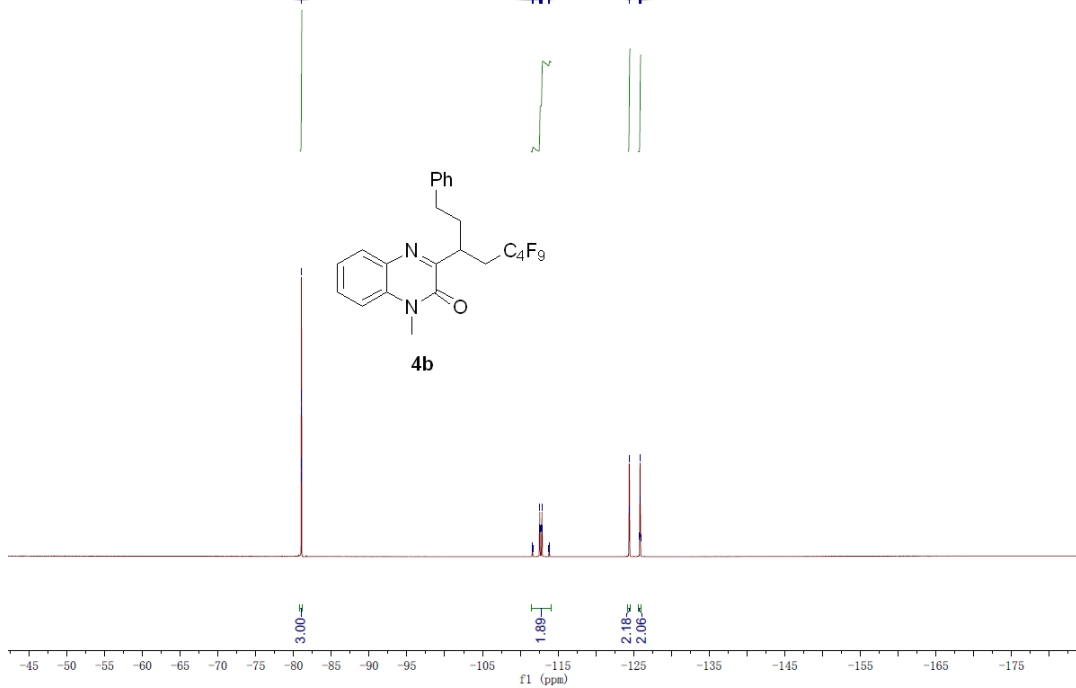

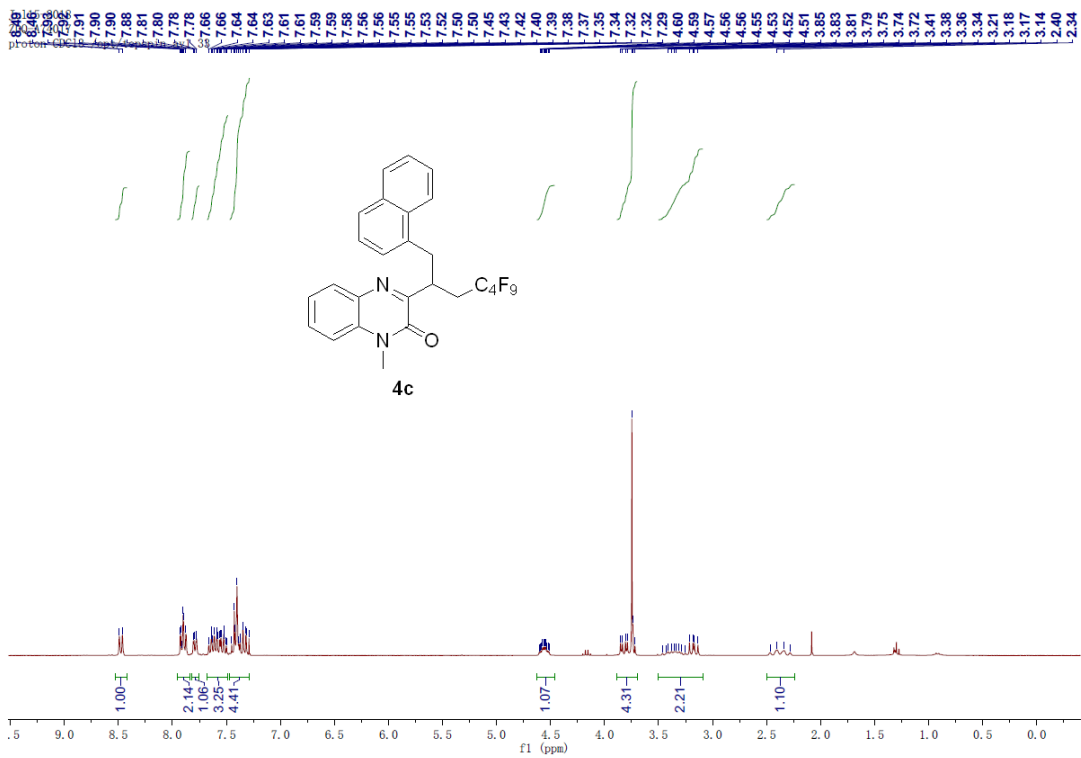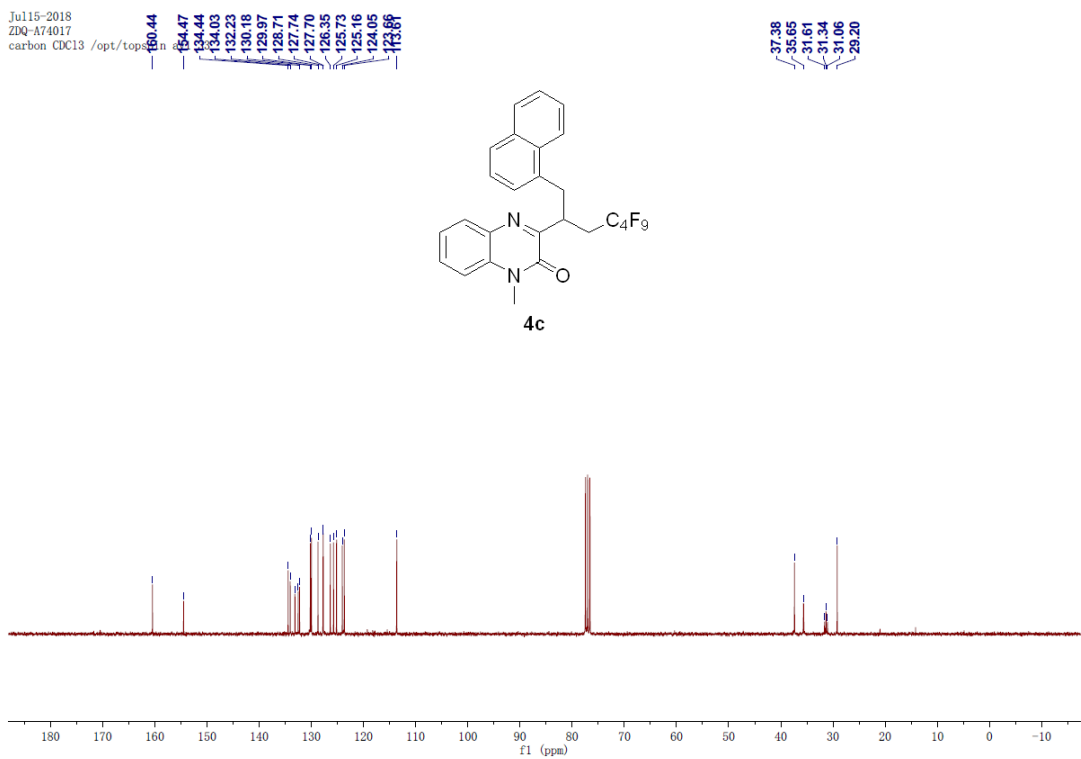

Jul15-2018  
 ZDQ-A74017  
 f19epd CDC13 /opt/topspin av1 33

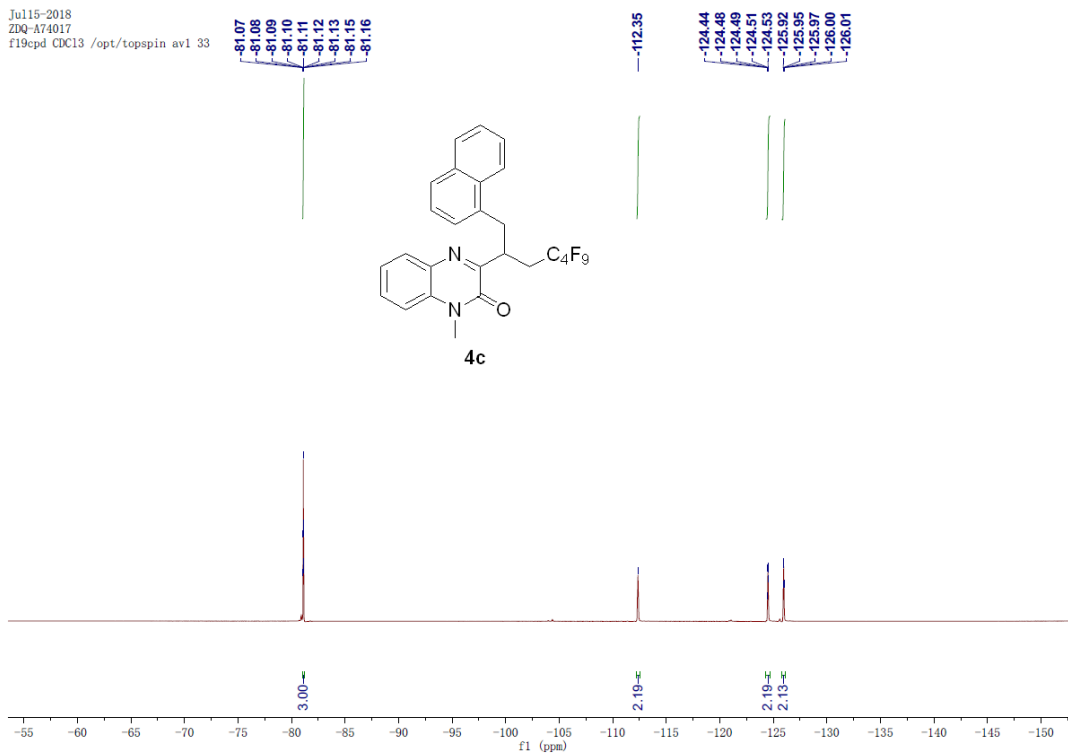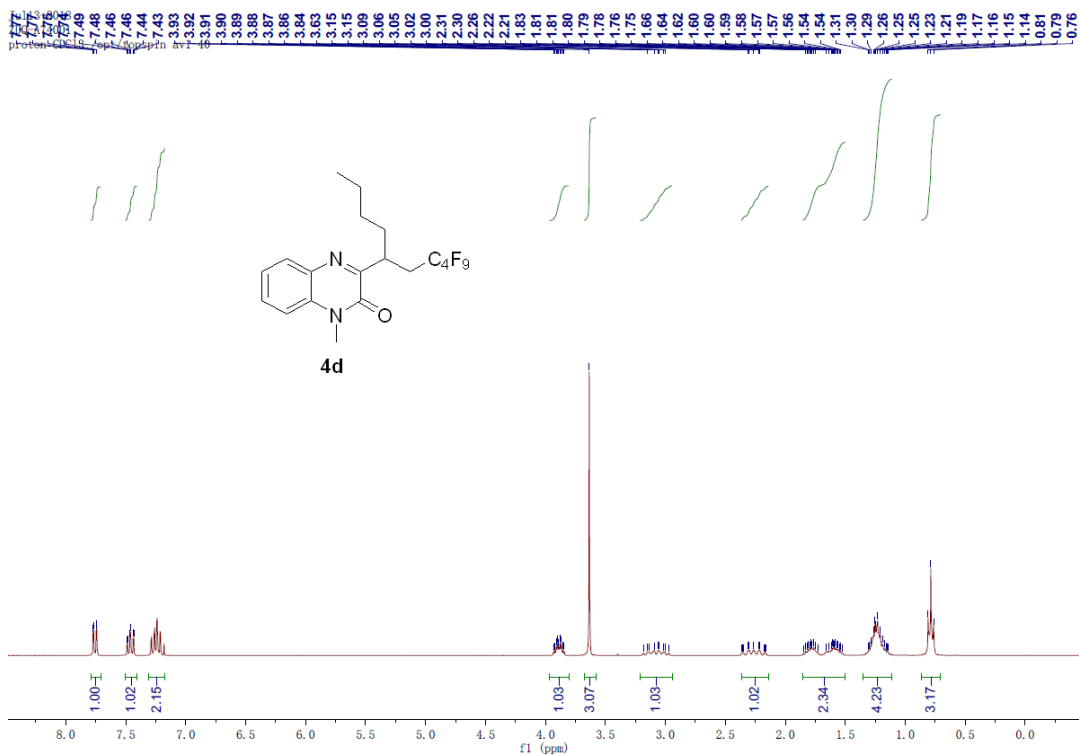

Jul13-2018  
ZDQ-A74001  
carbon CDCl3 /opt/tops

161.16

154.41

133.05

132.49

129.96

129.92

123.55

113.56

34.55

34.11

32.87

32.59

32.31

29.14

29.08

22.55

13.81

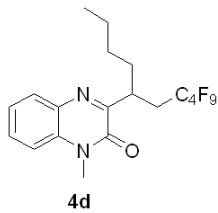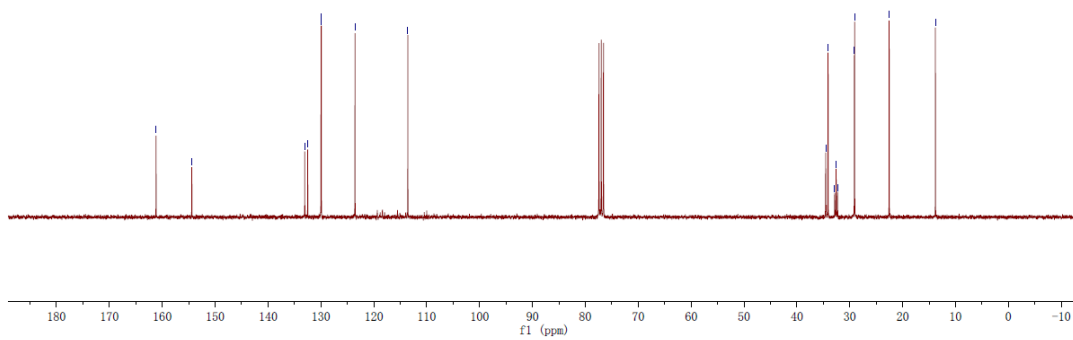

Jul13-2018  
ZDQ-A74001  
f19cpd CDCl3

83.06

81.07

81.08

81.09

81.10

81.11

81.12

81.14

81.15

-111.71

-111.76

-111.80

-112.67

-112.71

-112.76

-112.89

-112.93

-112.98

-113.65

-113.90

-113.95

-124.44

-124.47

-124.51

-124.54

-125.84

-125.87

-125.92

-125.95

-125.99

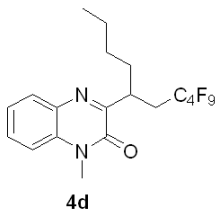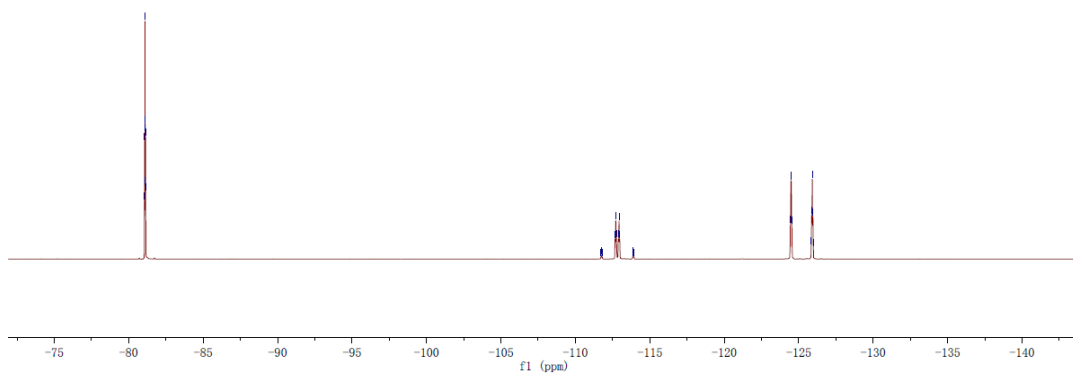

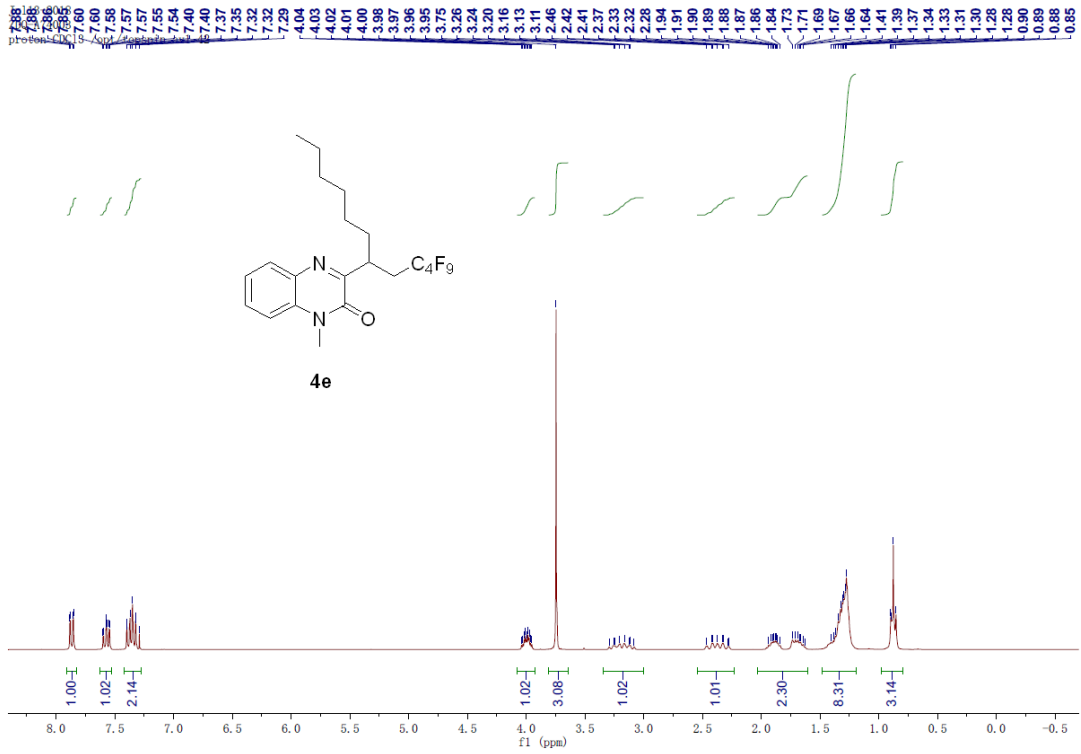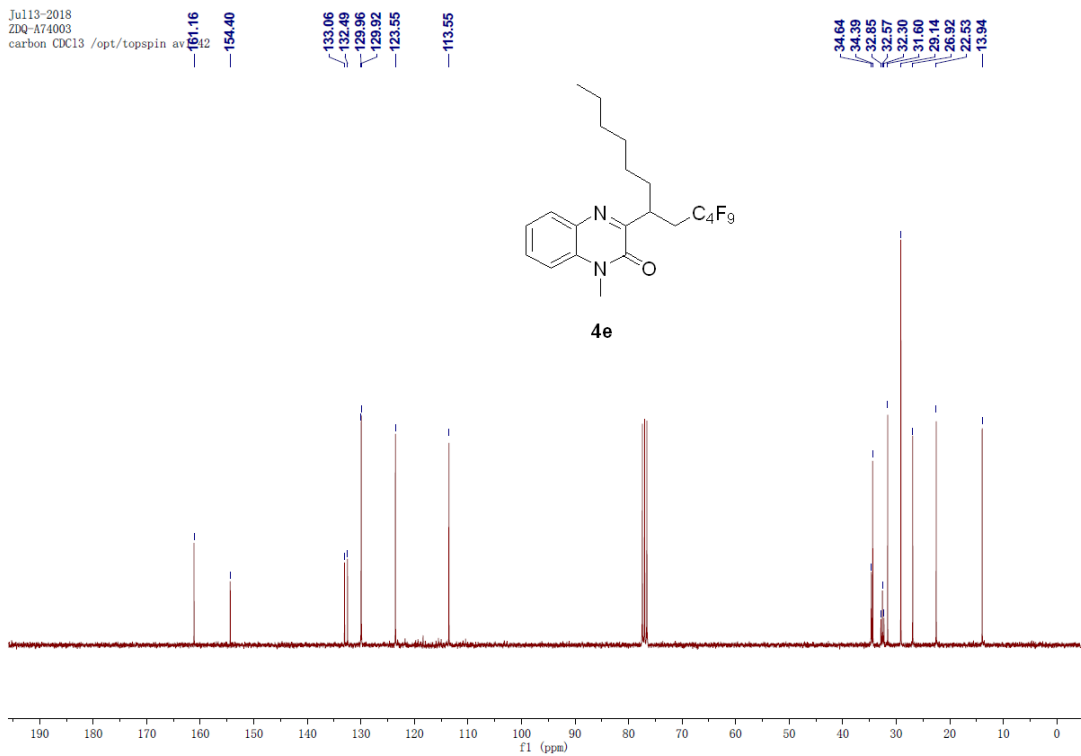

Jul13-2018  
 ZDQ-A74003  
 f19epd CDC13 /opt/topspi

81.05  
 81.06  
 81.07  
 81.08  
 81.10  
 81.11  
 81.12  
 81.13  
 81.14

-111.70  
 -111.75  
 -111.80  
 -112.06  
 -112.71  
 -112.75  
 -112.88  
 -112.93  
 -112.97  
 -113.84  
 -113.89  
 -124.44  
 -124.47  
 -124.50  
 -124.53  
 -125.87  
 -125.91  
 -125.95

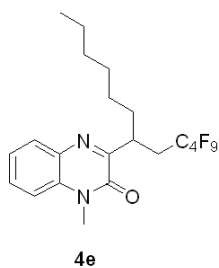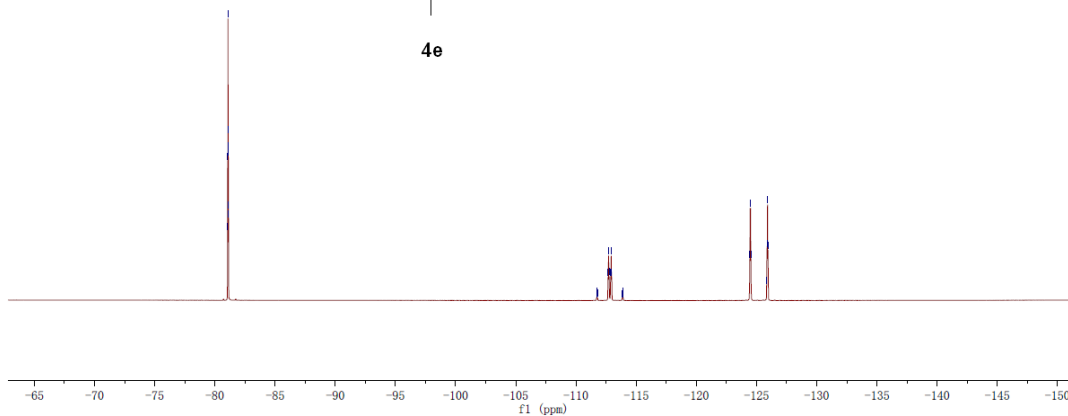

7.77  
 7.76  
 7.74  
 7.73  
 7.72  
 7.49  
 7.47  
 7.46  
 7.46  
 7.44  
 7.43  
 7.29  
 7.26  
 7.24  
 7.21  
 7.18

4.02  
 4.01  
 3.99  
 3.98  
 3.96  
 3.95  
 3.94  
 3.93  
 3.64  
 3.13  
 3.12  
 3.08  
 3.04  
 3.01  
 2.99  
 2.33  
 2.28  
 2.24  
 2.19  
 2.14  
 1.70  
 1.66  
 1.49  
 1.44  
 1.08  
 1.06  
 0.88  
 0.87

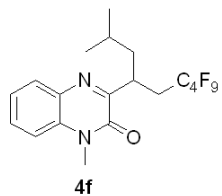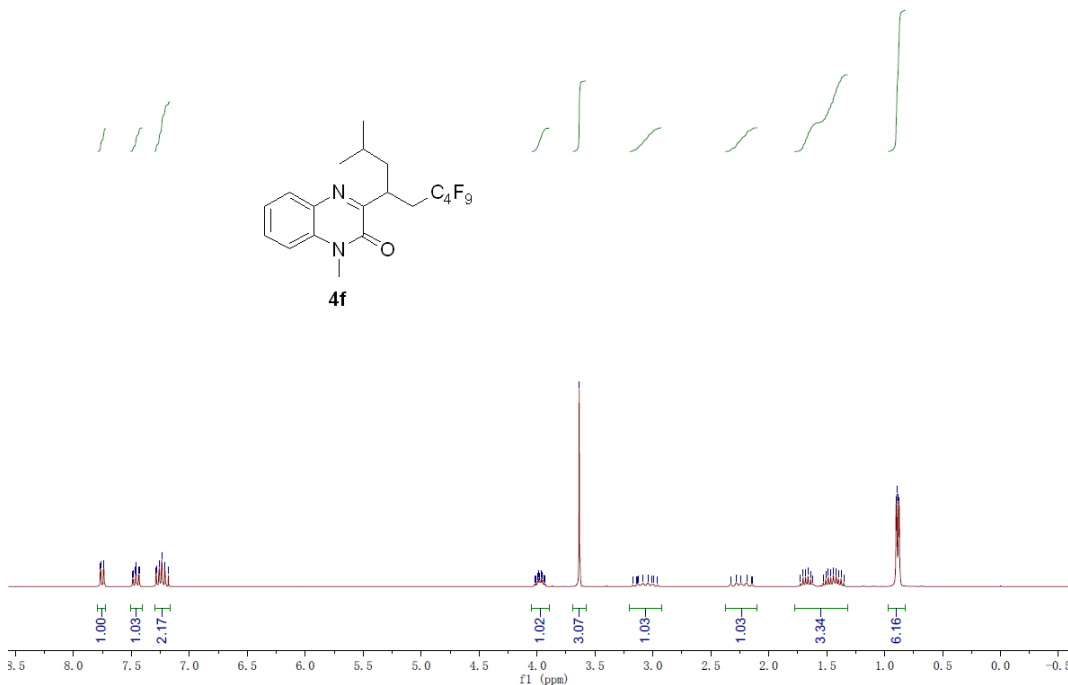

Jul13-2018  
ZDQ-A74005  
carbon CDC13 /opt/topspin av1 49

161.41  
154.36

133.06  
132.55  
129.96  
123.55

113.55

43.69

33.15  
32.87  
32.60  
29.14  
25.97  
22.67  
22.28

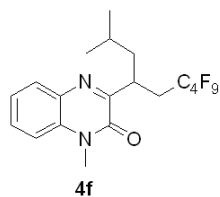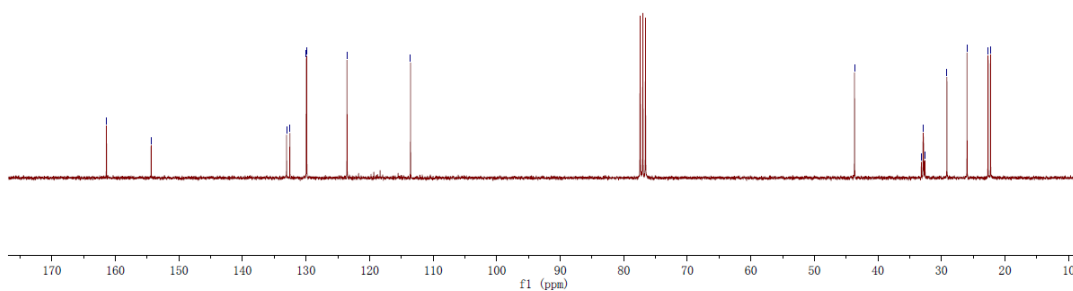

Jul13-2018  
ZDQ-A74005  
f19cpd CDC13 /opt/topspin av1 49

81.04  
81.05  
81.06  
81.07  
81.08  
81.10  
81.11  
81.12  
81.13

111.67  
112.59  
112.63  
112.68  
112.78  
112.82  
112.87  
113.73  
113.78  
124.43  
124.46  
124.48  
124.49  
124.53  
125.83  
125.86  
125.91  
125.94  
125.95  
125.98

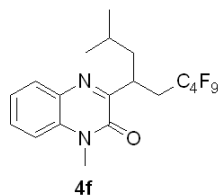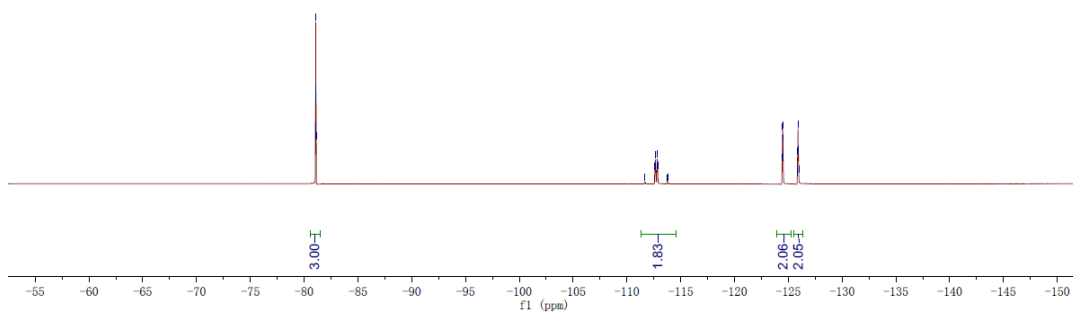



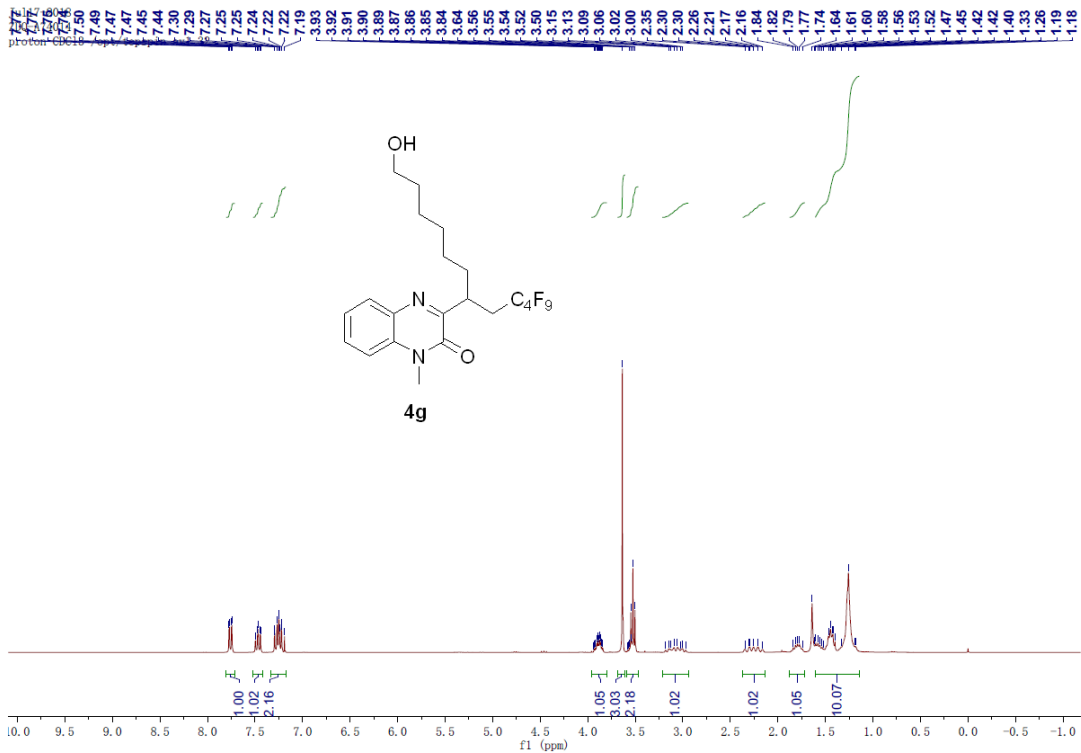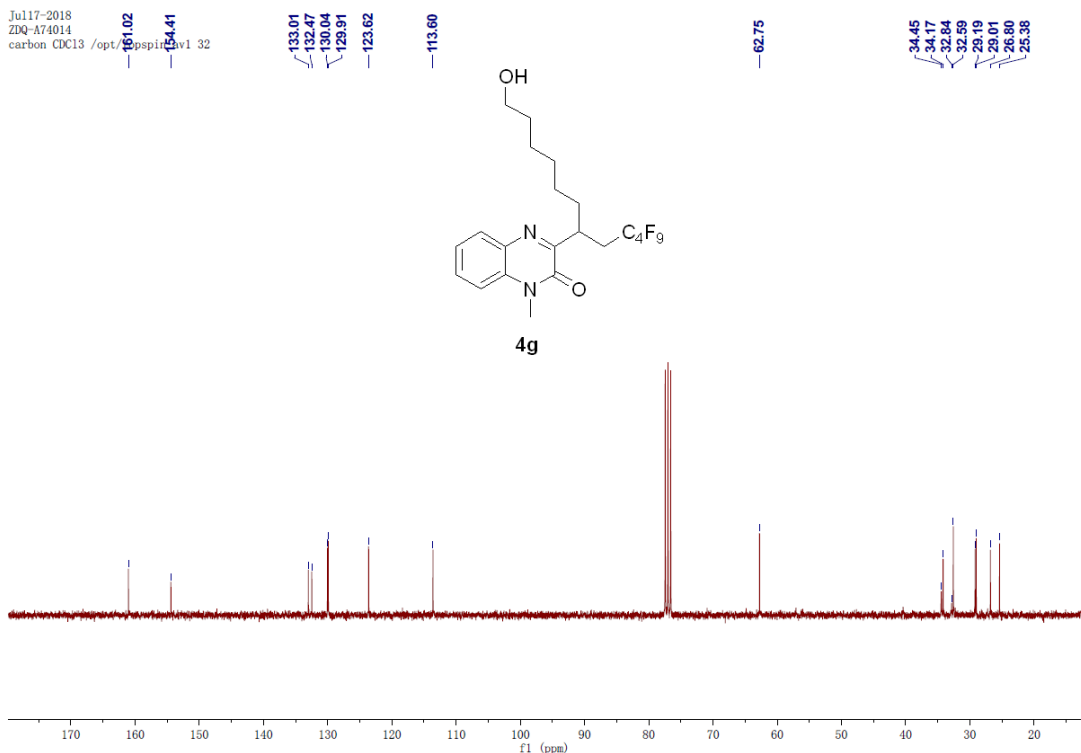

Jul17-2018  
 ZDQ-A74014  
 f19epd CDC13 /opt/topspin av1 32

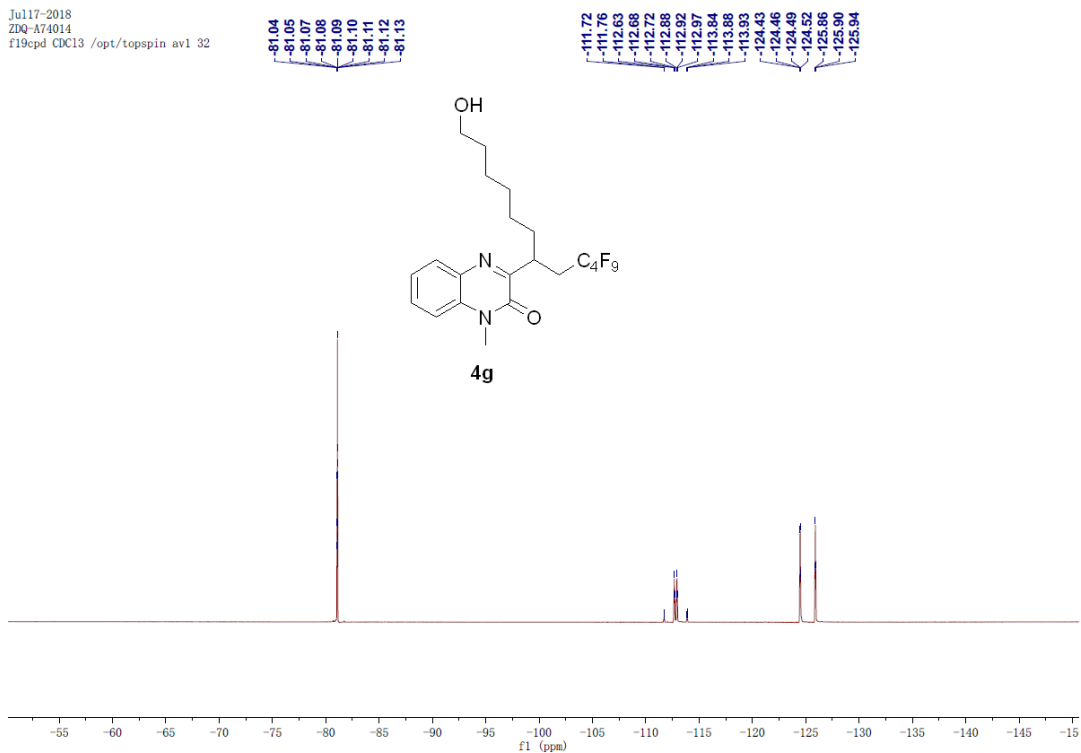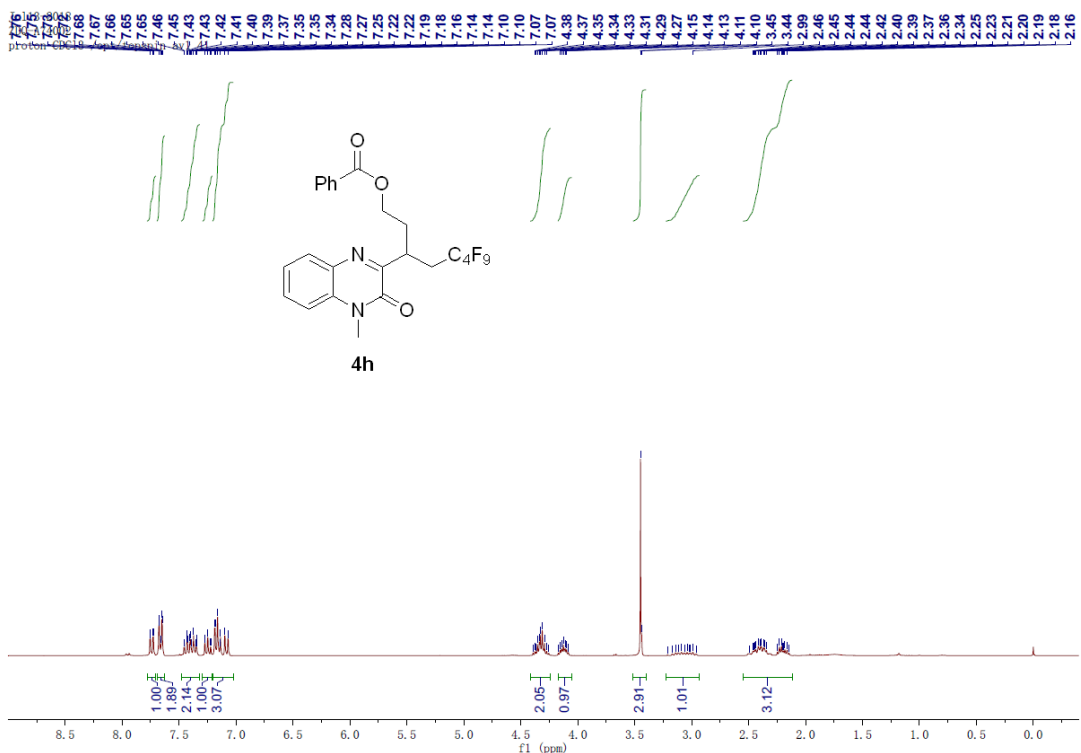

Jul13-2018  
 ZDQ-A74002  
 carbon CDC13 /opt/ops av1 41

156.09  
 160.09  
 154.37

133.06  
 132.70  
 132.41  
 130.19  
 129.98  
 129.90  
 128.28  
 126.12  
 123.63  
 113.57

62.88

33.53  
 33.26  
 33.06  
 28.96

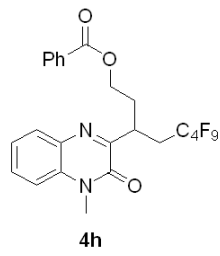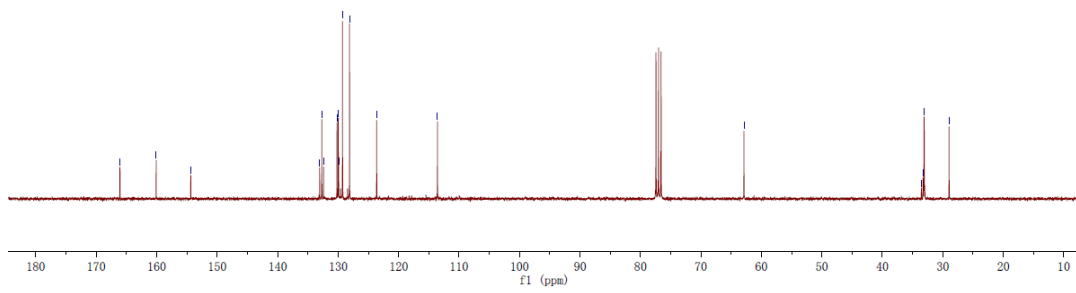

Jul13-2018  
 ZDQ-A74002  
 f19cpd CDC13 /opt/topspin av1 41

81.00  
 81.01  
 81.02  
 81.04  
 81.05  
 81.06  
 81.07  
 81.08  
 81.09  
 111.51  
 111.56  
 111.61  
 112.47  
 112.52  
 112.57  
 113.01  
 113.05  
 113.10  
 113.16  
 113.97  
 114.01  
 114.06  
 124.37  
 124.41  
 124.44  
 125.82  
 125.86  
 125.90

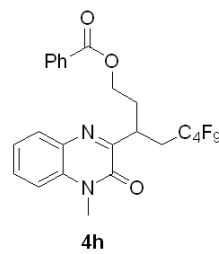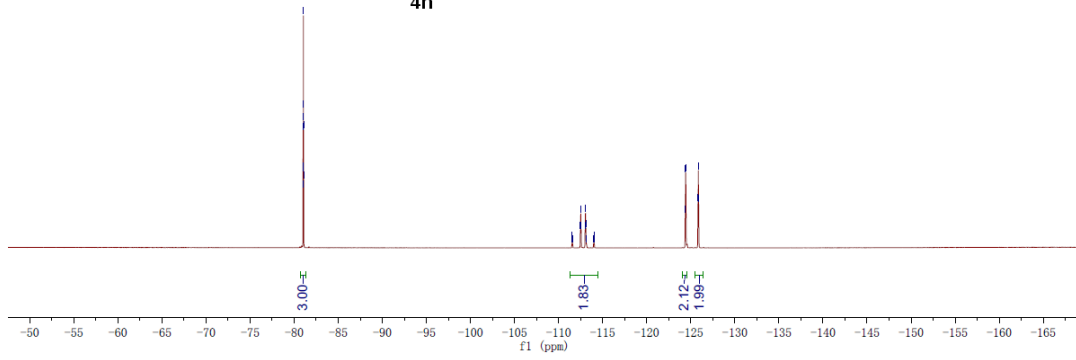

7.751  
7.746  
7.741  
7.736  
7.731  
7.726  
7.721  
7.716  
7.711  
3.98  
3.96  
3.95  
3.94  
3.93  
3.91  
3.64  
3.63  
3.13  
3.11  
3.10  
3.07  
3.03  
3.01  
2.98  
2.97  
2.36  
2.33  
2.33  
2.30  
2.29  
2.28  
2.27  
2.25  
2.24  
2.22  
2.21  
2.20  
2.19  
2.18  
2.17  
2.16  
2.15  
2.14  
2.13  
2.12  
2.11  
2.09  
2.08  
2.06  
2.05  
2.04  
2.03  
2.02  
2.01  
1.13  
1.11  
1.09

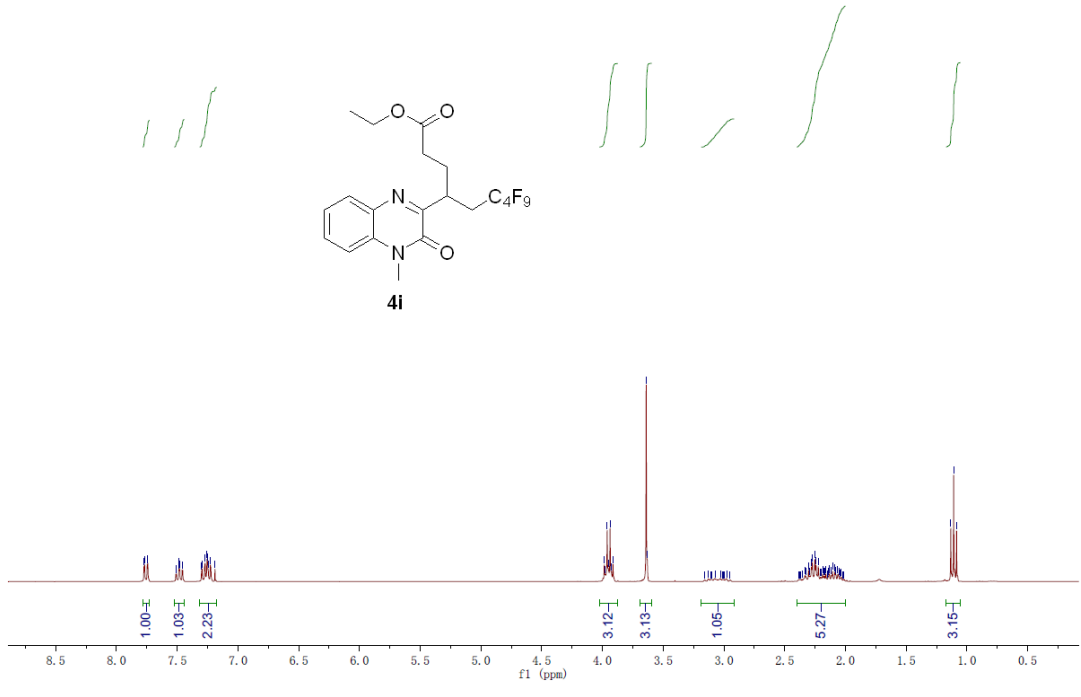

Jul13-2018  
ZDQ-A74008  
carbon CDC13 /opt/tops

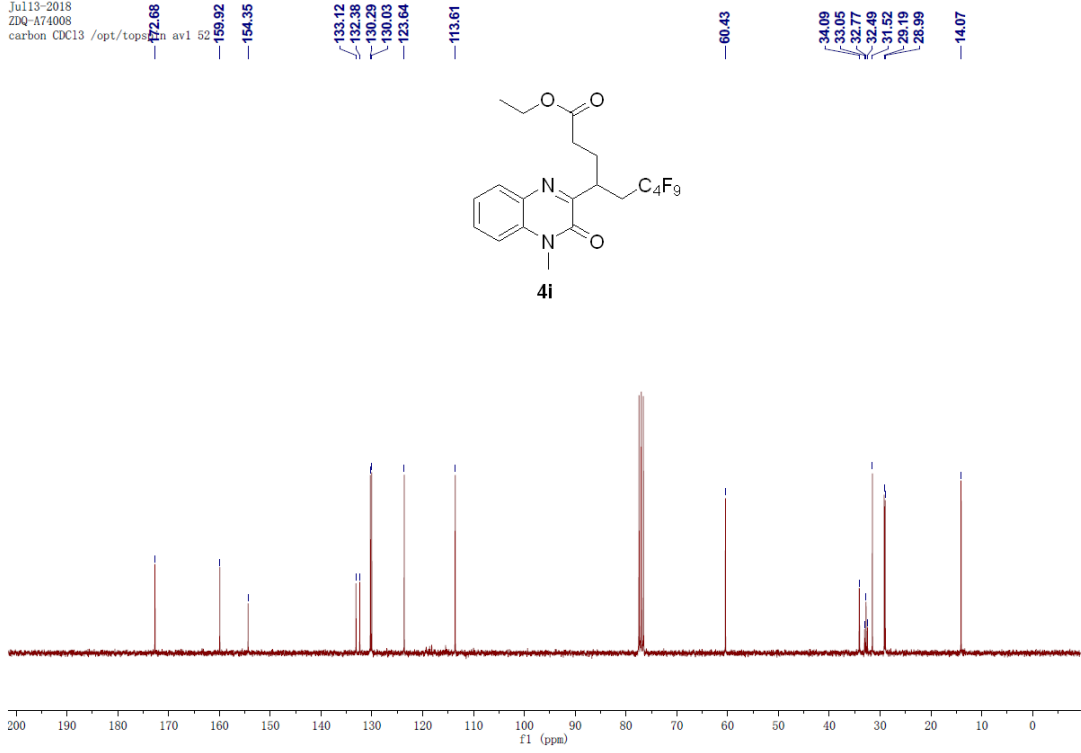

172.68  
159.92  
154.35  
133.12  
132.36  
130.29  
130.03  
123.64  
113.61  
60.43  
34.09  
33.05  
32.77  
32.49  
31.52  
29.19  
28.99  
14.07

Jul13-2018  
ZDQ-A74008  
f19cpd CDC13 /op

81.03  
81.04  
81.05  
81.06  
81.07  
81.08  
81.10  
81.11  
81.12

111.66  
111.71  
111.75  
112.62  
112.67  
112.71  
112.99  
113.04  
113.08  
113.95  
114.00  
114.04  
124.41  
124.44  
124.47  
125.85  
125.89  
125.93  
125.94

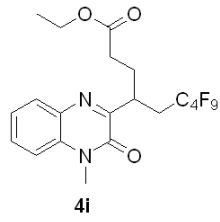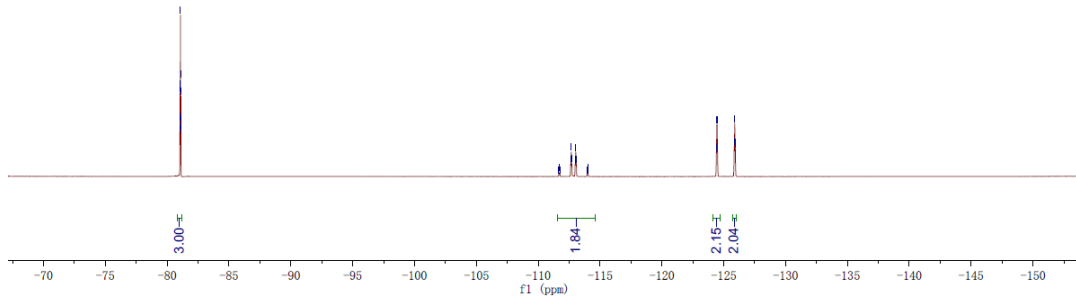

4.04  
4.03  
4.03  
4.03  
4.02  
4.01  
4.01  
4.00  
4.00  
3.99  
3.98  
3.98  
3.96  
3.94  
3.93  
3.93  
3.64  
2.98  
2.93  
2.32  
2.28  
2.27  
2.23  
2.19  
2.16  
2.14  
2.14  
2.12  
2.12  
2.11  
2.10  
2.08  
2.07  
2.04  
2.03  
2.02  
2.01  
2.00  
2.00  
1.99  
1.97  
1.96  
1.76  
1.75  
1.73  
1.72  
1.71  
1.71  
1.69  
1.68  
1.67  
1.66  
1.65  
1.64  
1.63  
1.63  
1.61  
1.60  
1.59  
1.58  
1.57  
1.24  
1.23  
1.22  
1.21  
1.19  
1.18

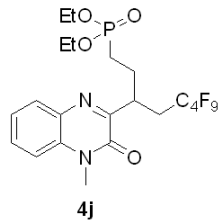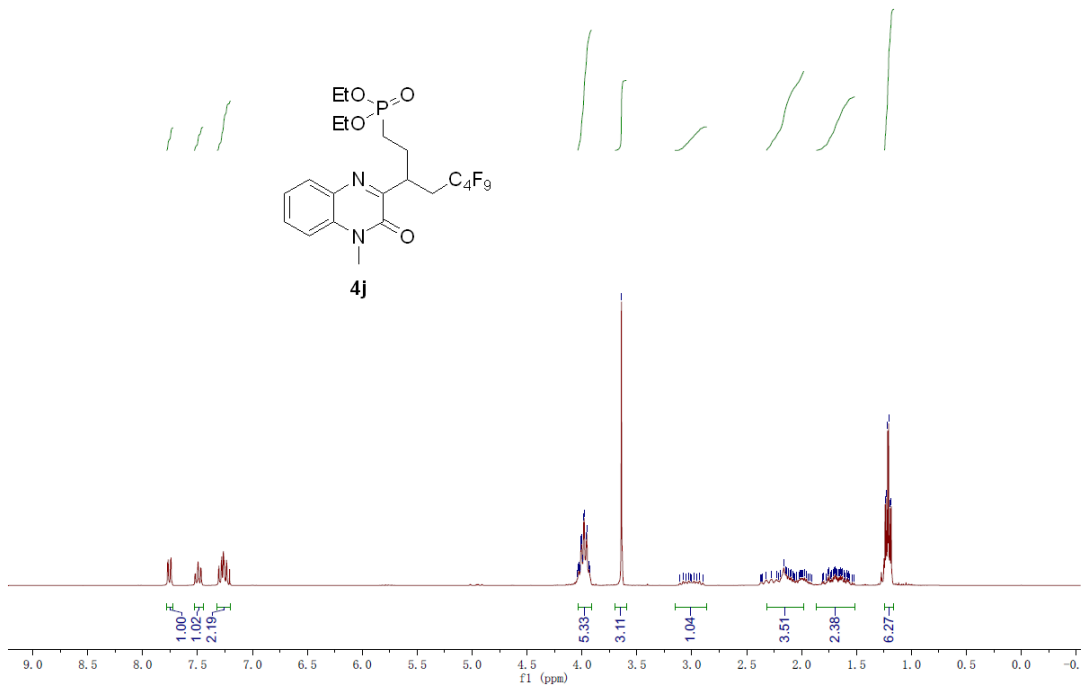

Jul17-2018  
ZDQ-A74012  
carbon CDC13 /opt/topspin

159.54  
154.30

133.07  
132.35  
130.42  
123.72

113.65

61.67  
61.56

34.91  
34.67  
32.96  
32.68  
32.40  
29.22  
26.81  
26.76  
24.00  
22.11  
16.37

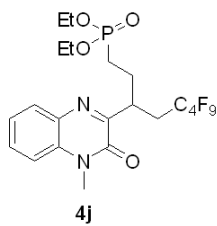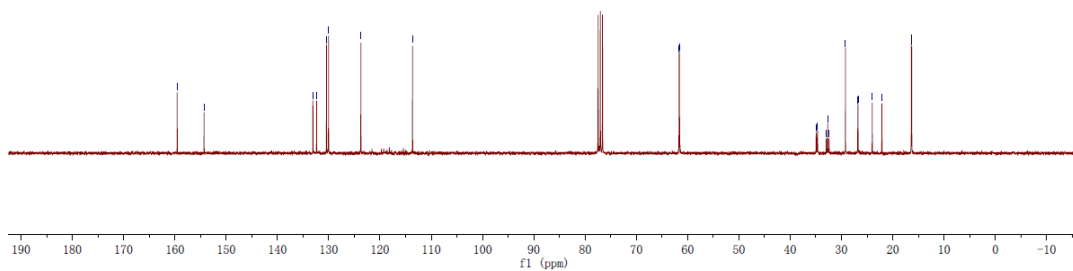

Jul17-2018  
ZDQ-A74012  
f19cpd CDC13 /opt/topspin av1 31

81.06  
81.07  
81.08  
81.09  
81.10  
81.11  
81.12  
81.14  
81.15

111.60  
111.65  
111.69  
112.56  
112.60  
112.65  
112.99  
113.03  
113.08  
113.94  
113.99  
114.04  
124.41  
124.44  
124.47  
125.87  
125.94

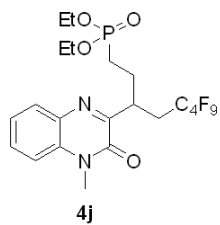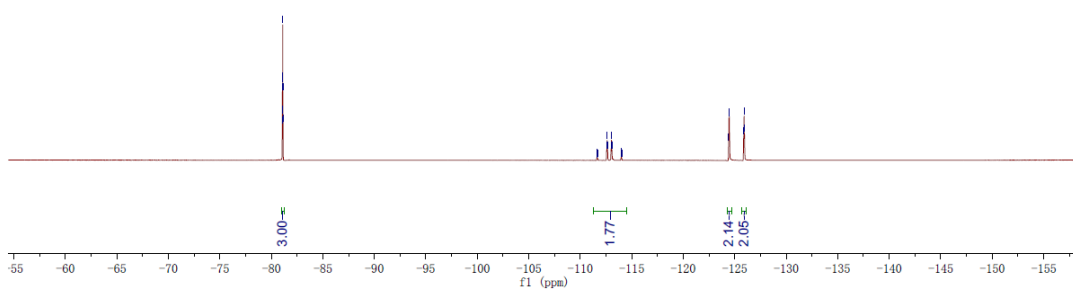

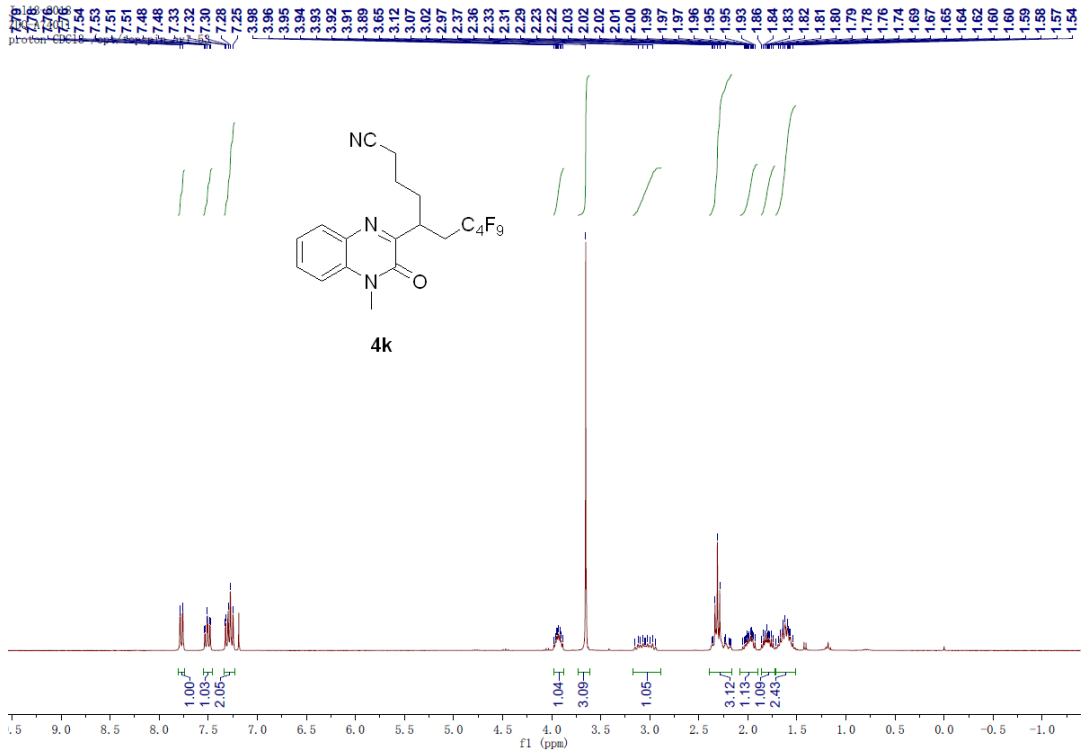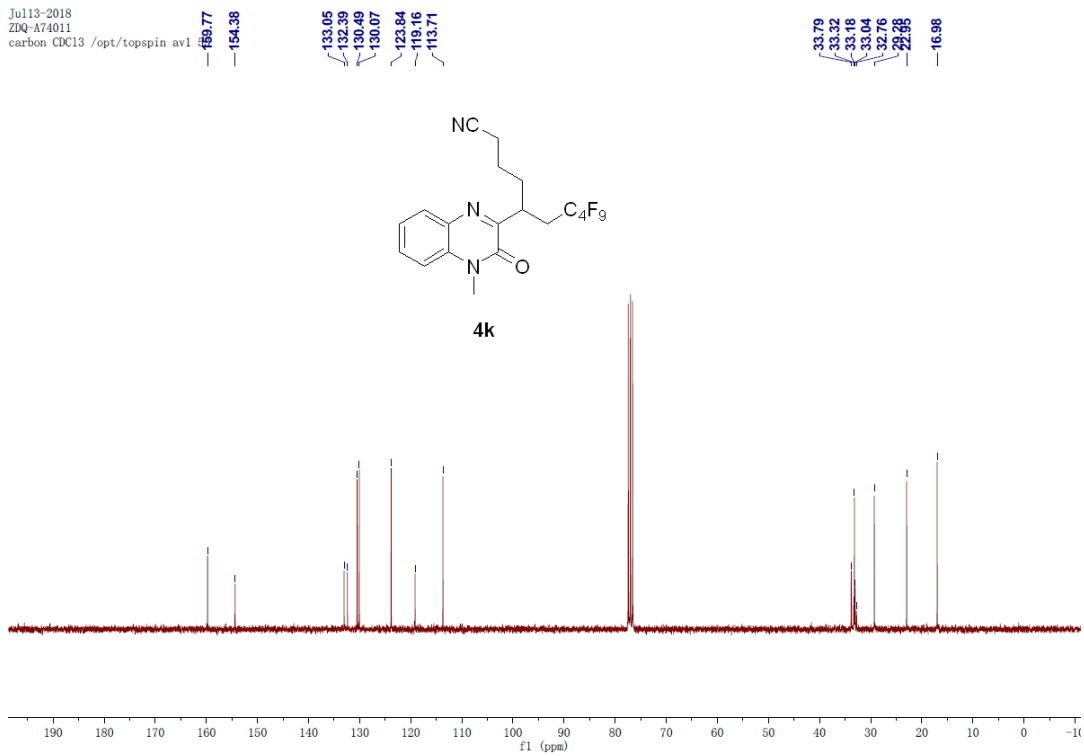

Jul13-2018  
 ZDQ-A74011  
 f19epd CDC13 /opt/topspin av1

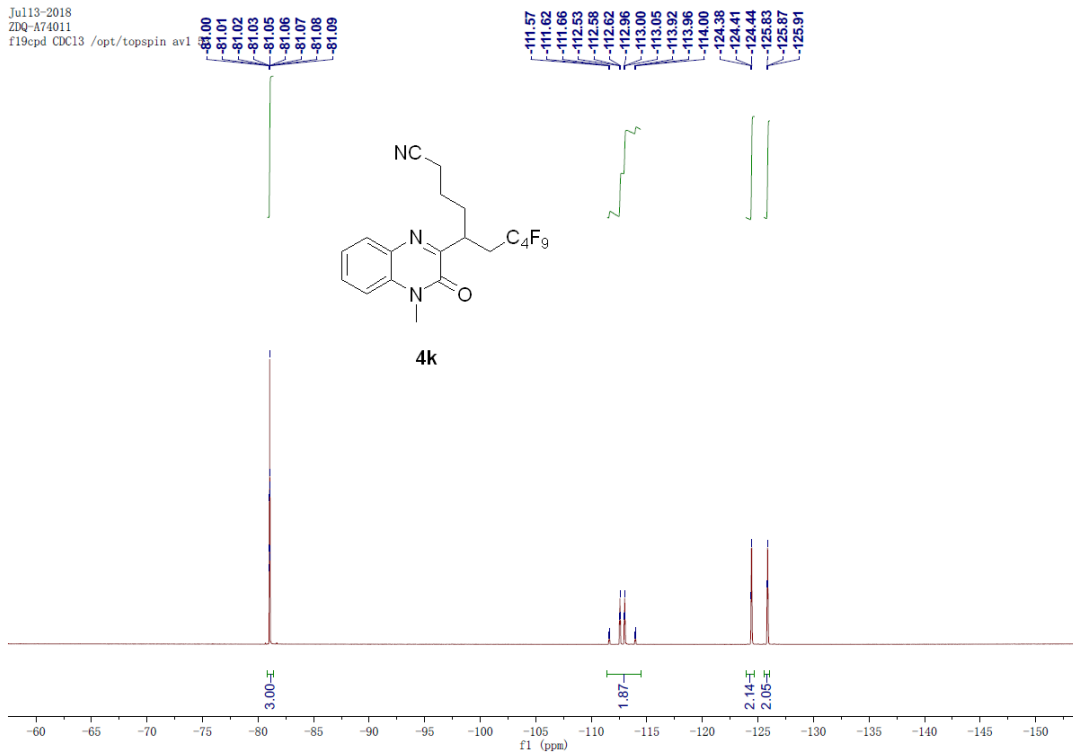

3.95  
 3.93  
 3.92  
 3.91  
 3.90  
 3.89  
 3.88  
 3.87  
 3.86  
 3.64  
 3.45  
 3.43  
 3.40  
 3.14  
 3.12  
 3.09  
 3.05  
 3.03  
 3.00  
 2.99  
 2.36  
 2.32  
 2.31  
 2.27  
 2.27  
 2.26  
 2.22  
 1.91  
 1.89  
 1.87  
 1.86  
 1.85  
 1.84  
 1.83  
 1.82  
 1.81  
 1.78  
 1.77  
 1.74  
 1.72  
 1.70  
 1.67  
 1.66  
 1.65  
 1.64  
 1.63  
 1.62  
 1.61  
 1.59  
 1.57  
 1.49  
 1.47  
 1.46  
 1.45  
 1.44  
 1.43  
 1.42  
 1.42  
 1.41  
 1.40  
 1.39  
 1.38  
 1.37  
 1.36  
 1.35  
 1.34  
 1.32

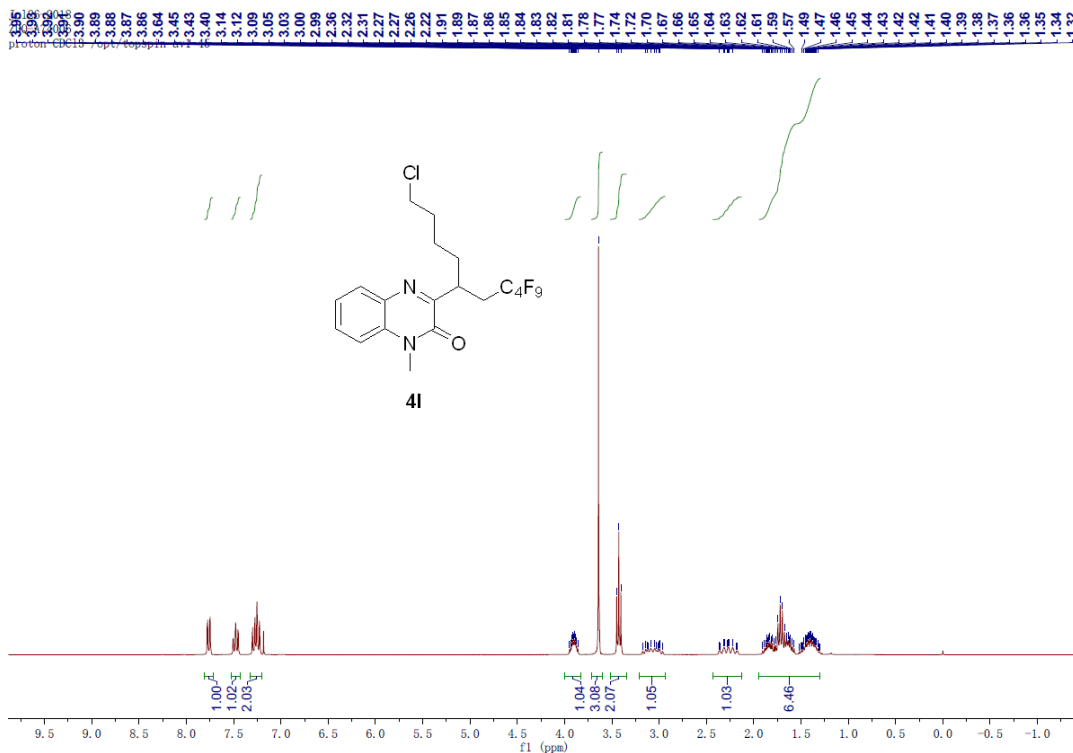



Jul26-2018  
 ZDQ-A74006  
 carbon CDC13 /opt/tc/in

160.61  
 154.38

133.06  
 132.45  
 130.16  
 129.98  
 123.66

113.62

44.56

34.39  
 33.36  
 32.92  
 32.54  
 29.19  
 24.12

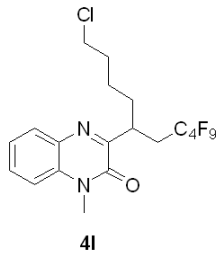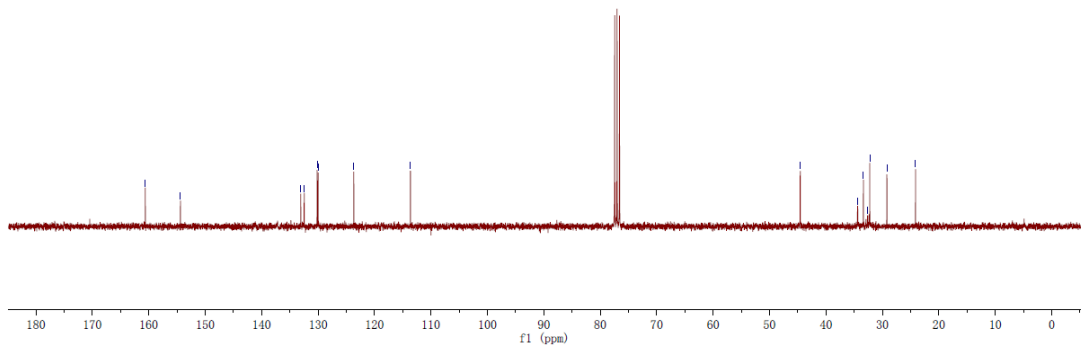

Jul26-2018  
 ZDQ-A74006  
 f19cpd CDC13

81.02  
 81.03  
 81.05  
 81.06  
 81.07  
 81.08  
 81.09  
 81.10  
 81.11

111.63  
 111.67  
 111.72  
 112.59  
 112.63  
 112.68  
 112.91  
 112.96  
 113.00  
 113.87  
 113.92  
 113.96  
 124.40  
 124.43  
 124.46  
 125.85  
 125.89  
 125.92

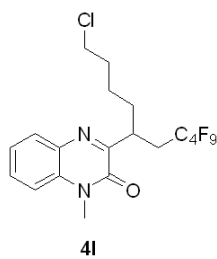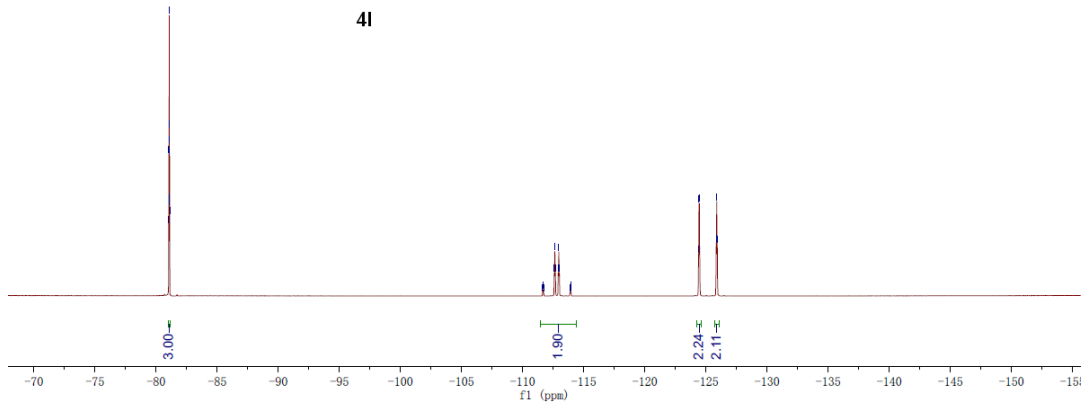

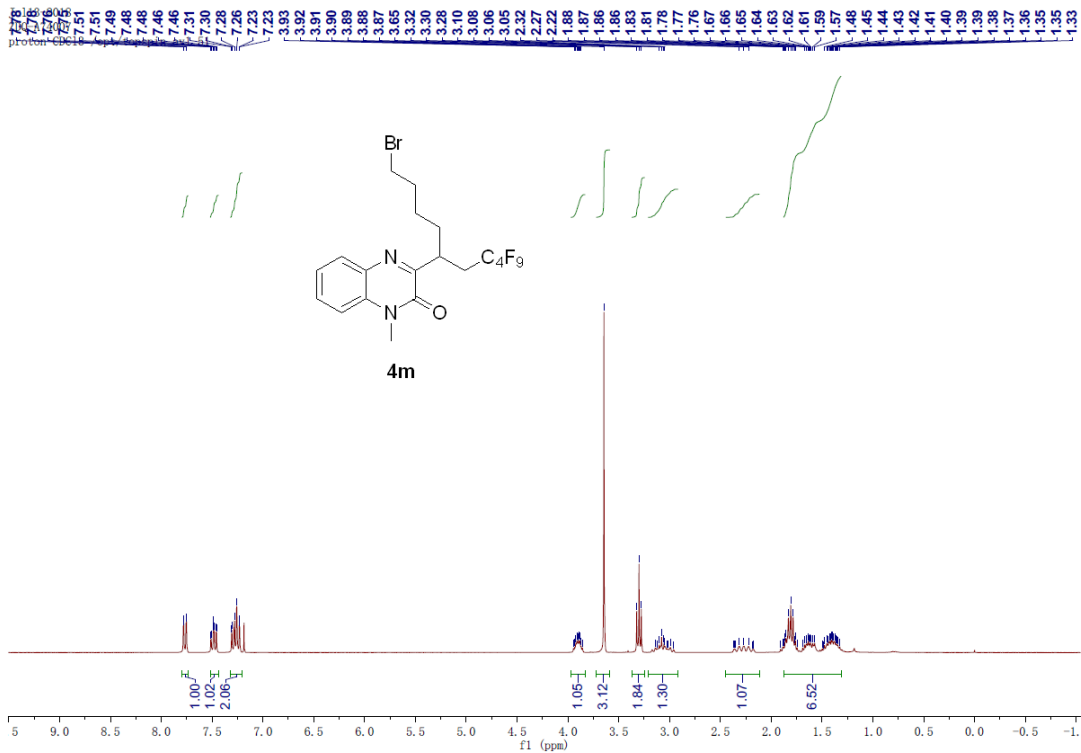

Jul13-2018  
 ZDQ-A74007  
 carbon CDC13

160.58

154.38

133.06

132.45

130.17

129.99

123.67

113.62

34.36

33.21

33.19

32.91

32.63

32.36

29.21

25.37

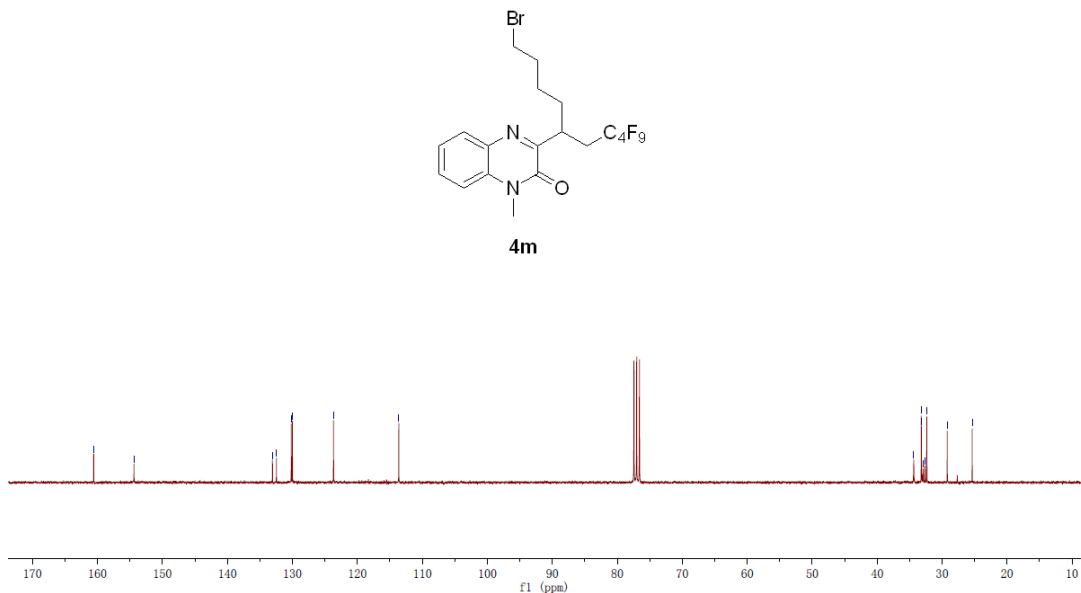

Jul13-2018  
ZDQ-A74007  
f19cpd CDC13 /opt/

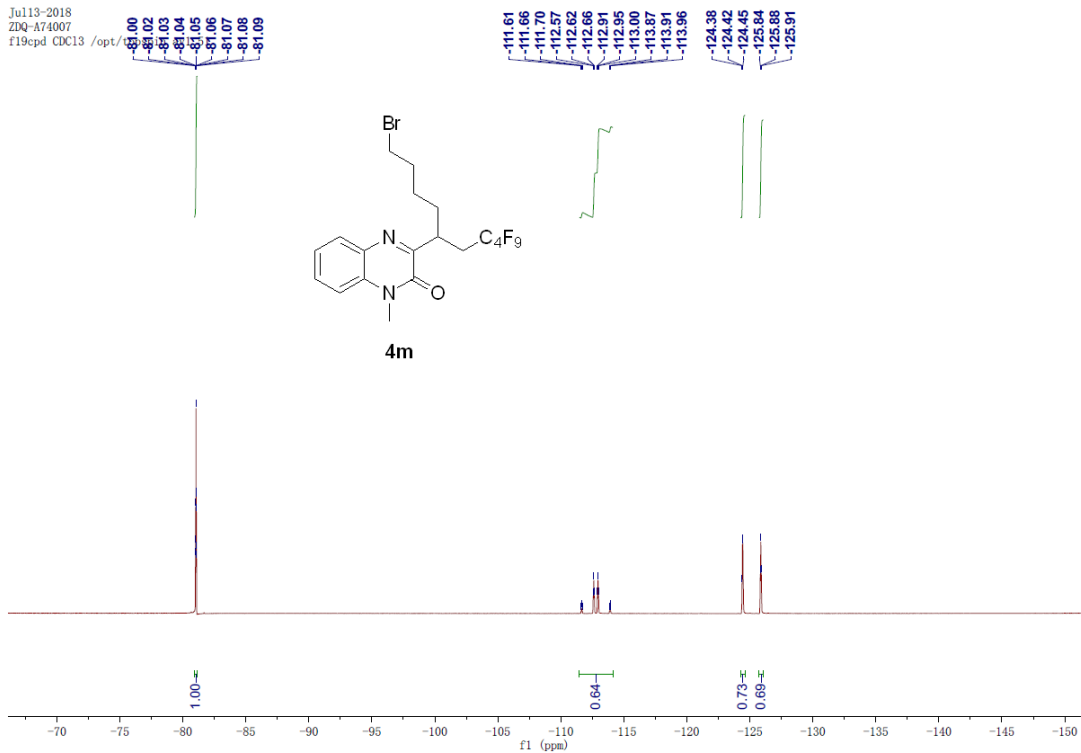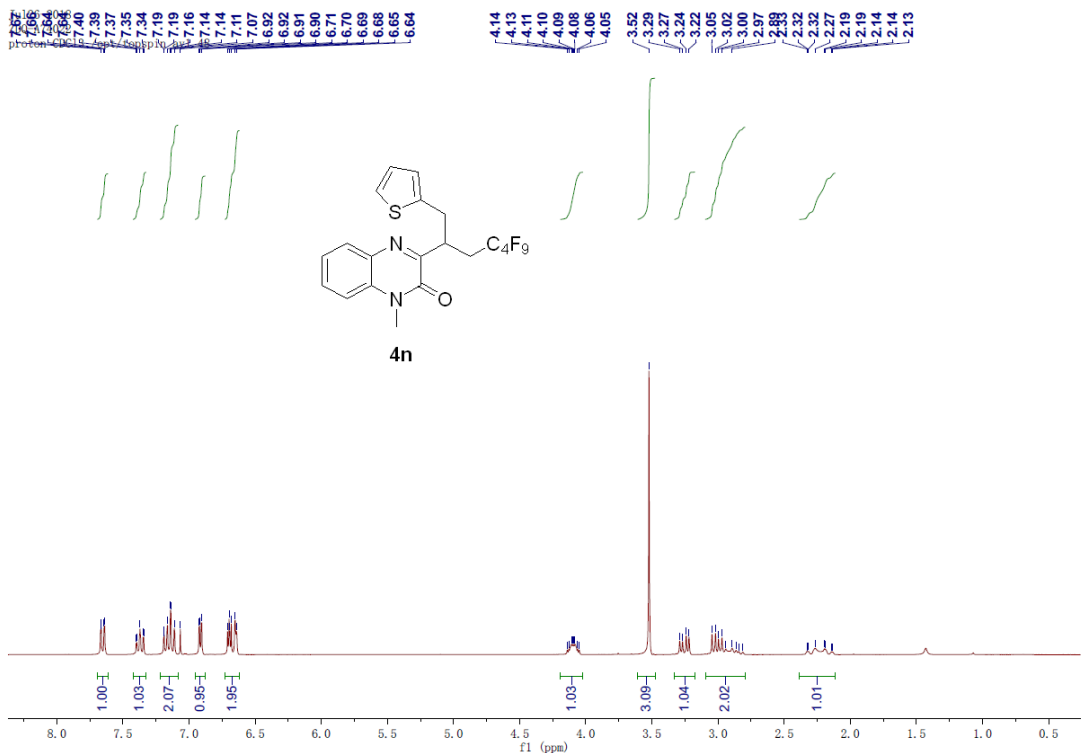

Jul26-2018  
ZDQ-A74022  
carbon CDC13 /opt/topspin av1 48

159.64  
154.24  
140.62  
133.13  
132.43  
130.29  
130.05  
126.82  
126.18  
124.27  
123.69  
113.64

36.92  
33.56  
32.04  
31.77  
31.49  
29.18

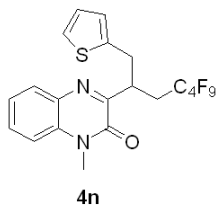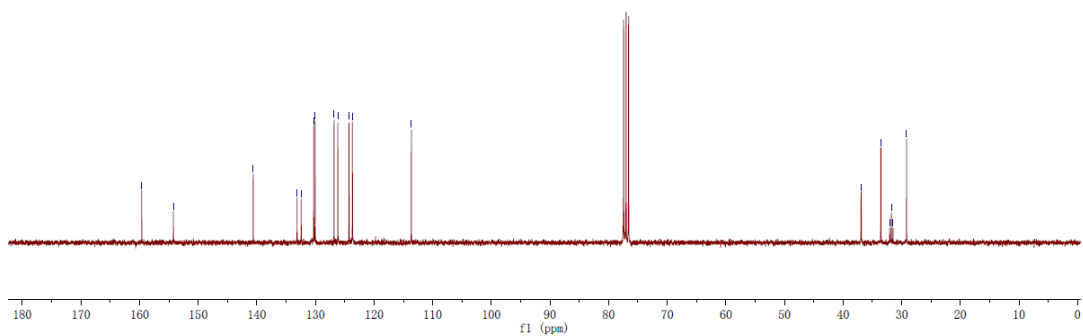

Jul26-2018  
ZDQ-A74022  
f19cpd CDC13 /opt/topspin av1 48

81.02  
81.03  
81.04  
81.05  
81.06  
81.07  
81.09  
81.10  
81.11

111.49  
112.46  
112.50  
112.53  
113.49

124.36  
124.40  
124.41  
124.43  
124.47  
125.83  
125.86  
125.90  
125.94  
125.97

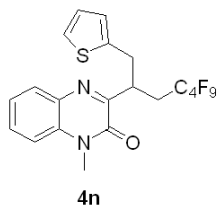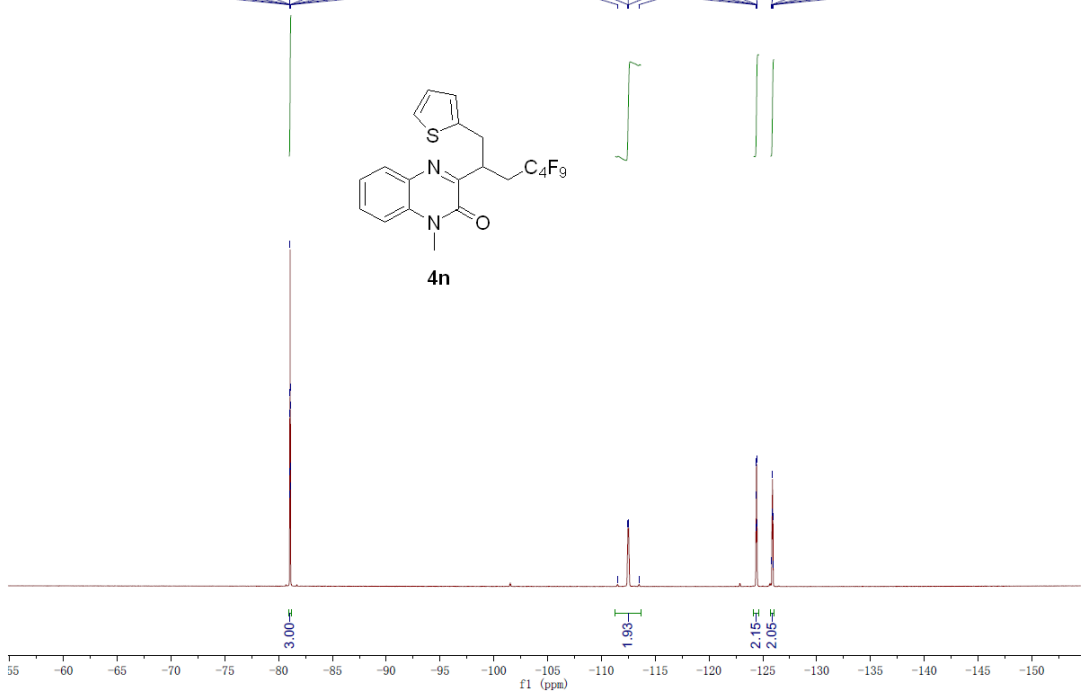

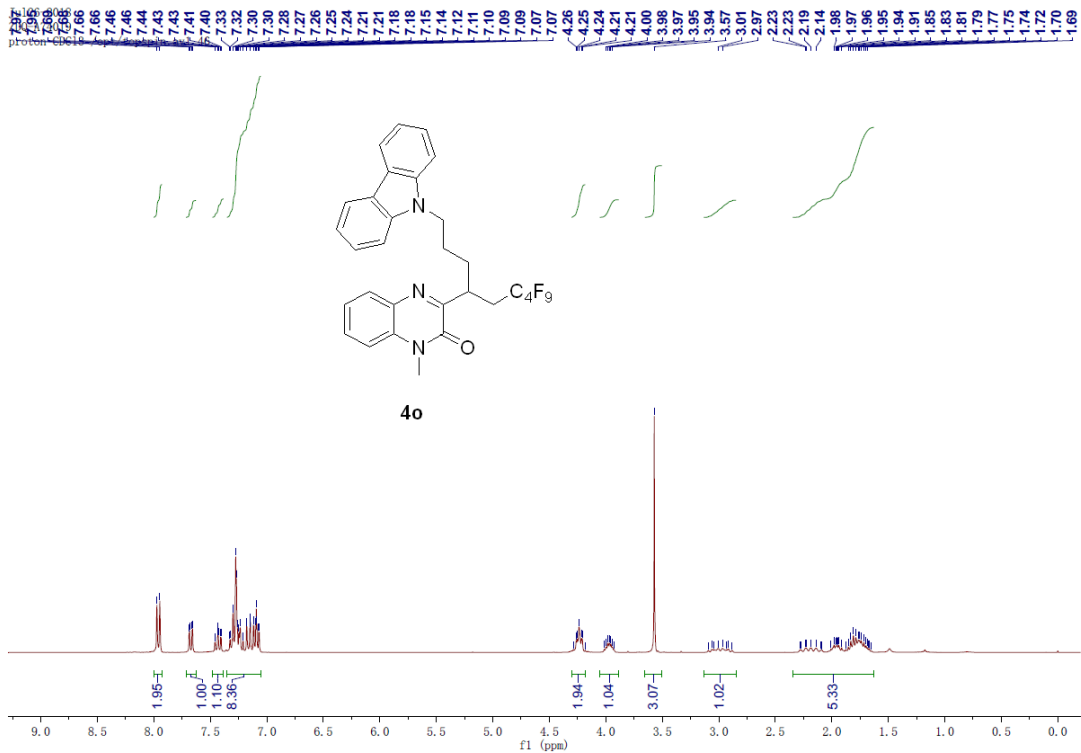

Jul26-2018  
ZDQ-A74019  
carbon CDC13 /opt/topspin av1

160.23

154.39

140.31

133.02

132.45

130.76

130.61

132.62

122.89

120.30

118.84

113.66

108.61

42.63

34.27

33.41

33.13

32.86

31.62

29.19

25.98

Jul26-2018  
ZDQ-A74019  
f19epd CDC13 /opt/tops

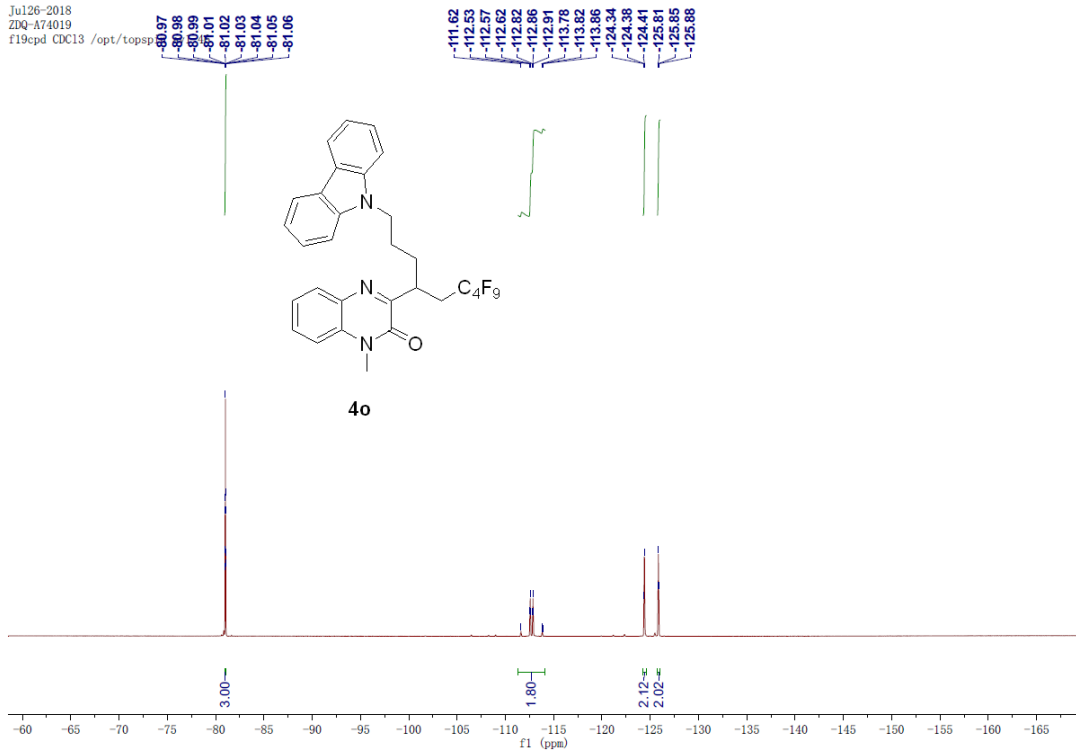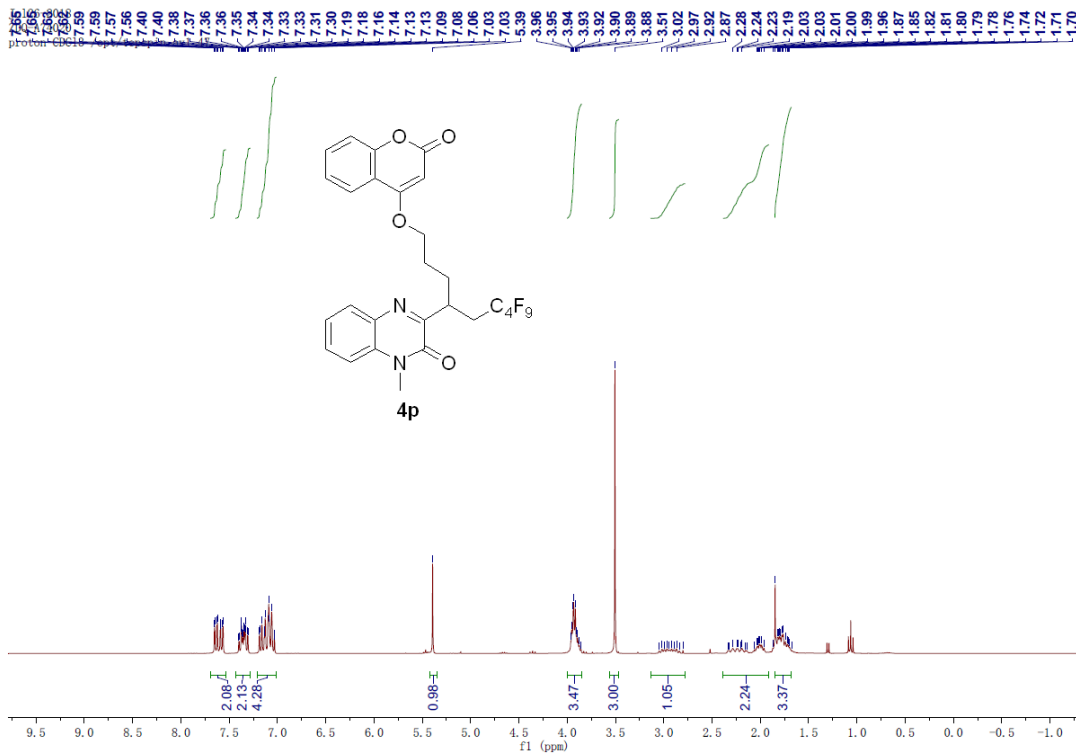

Jul26-2018  
ZDQ-A74020  
carbon CDC13 /opt/topspin

165.40  
162.73  
160.14  
154.36  
153.30

133.02  
132.37  
130.43  
129.93  
123.79  
116.68  
115.63  
113.68

90.43

68.64

34.30  
33.33  
33.05  
32.78  
30.27  
29.21  
25.95

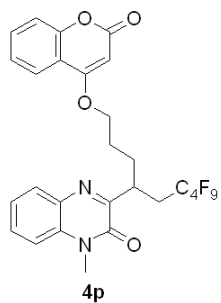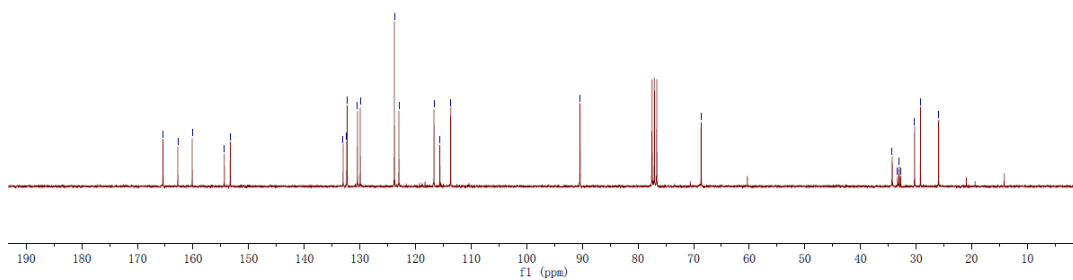

Jul26-2018  
ZDQ-A74020  
f19cpd CDC13 /opt/topspin av1 47

81.01  
81.02  
81.04  
81.05  
81.06  
81.07  
81.08  
81.09  
81.10

111.54  
111.59  
111.63  
112.90  
112.95  
112.99  
113.04  
113.91  
113.95  
113.99  
124.36  
124.39  
124.42  
125.63  
125.67  
125.91

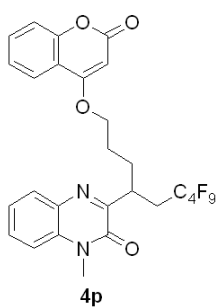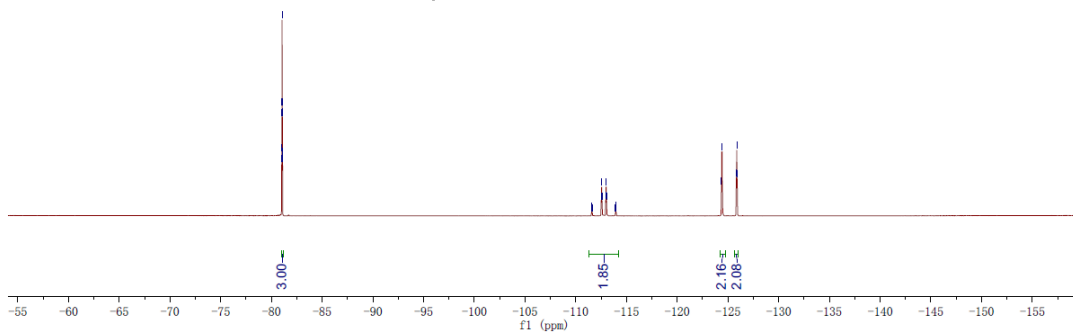

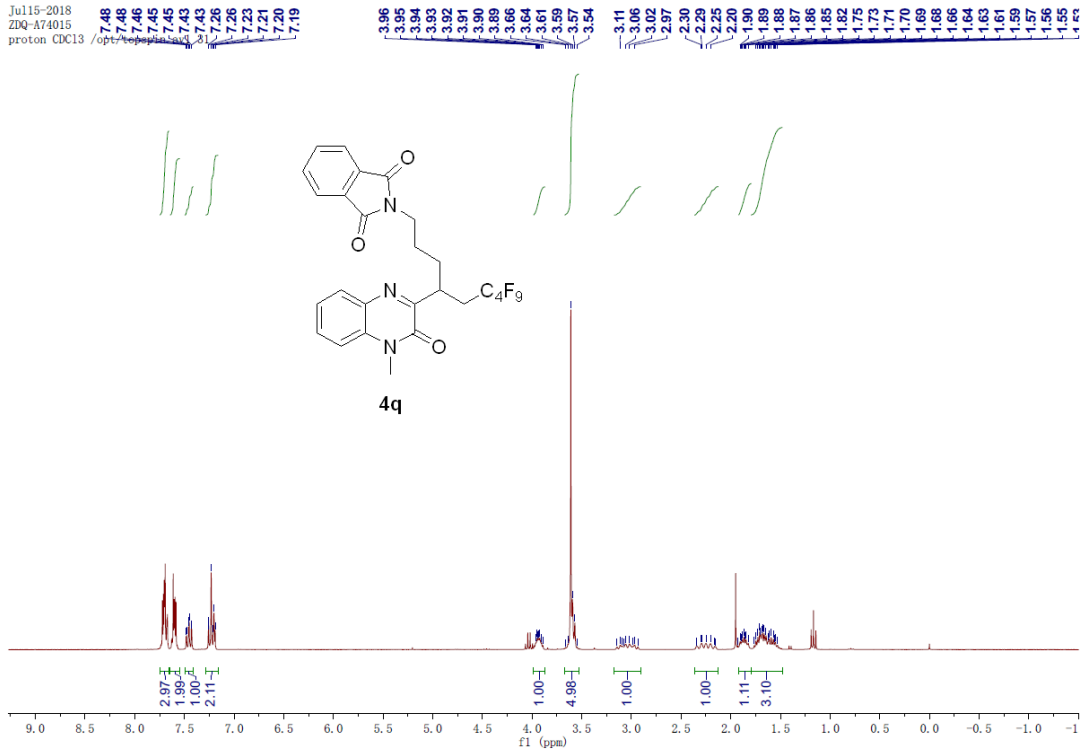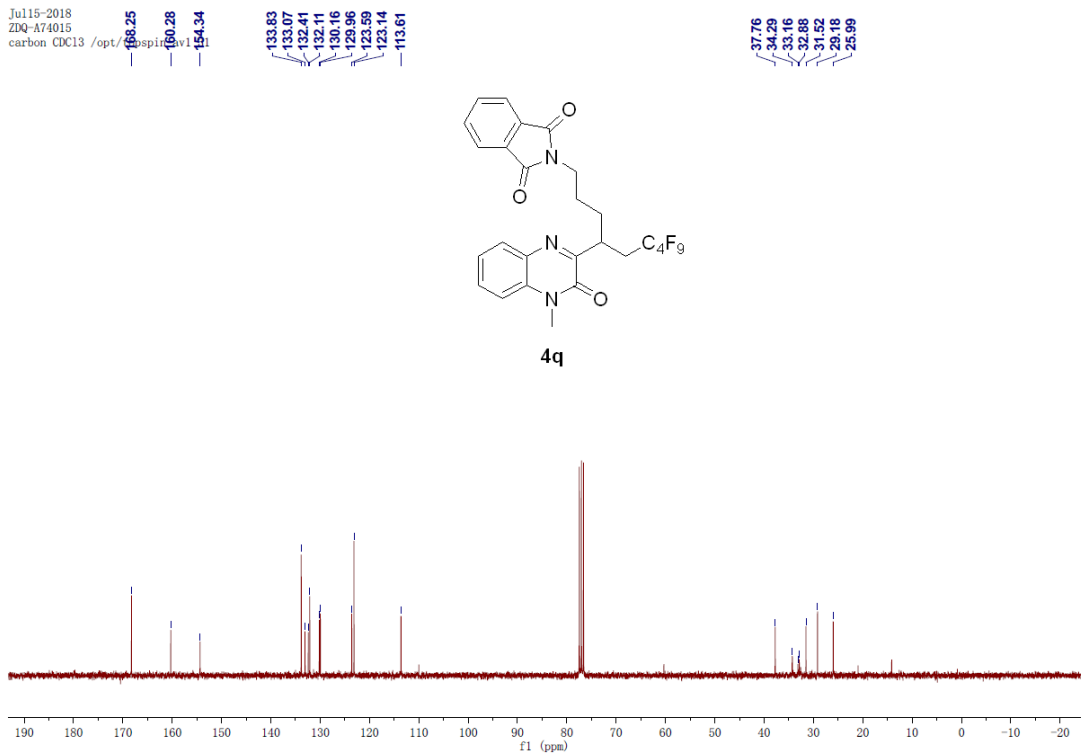



Jul15-2018  
 ZDQ-A74015  
 f19epd CDC13 /opt/topspin av1 31

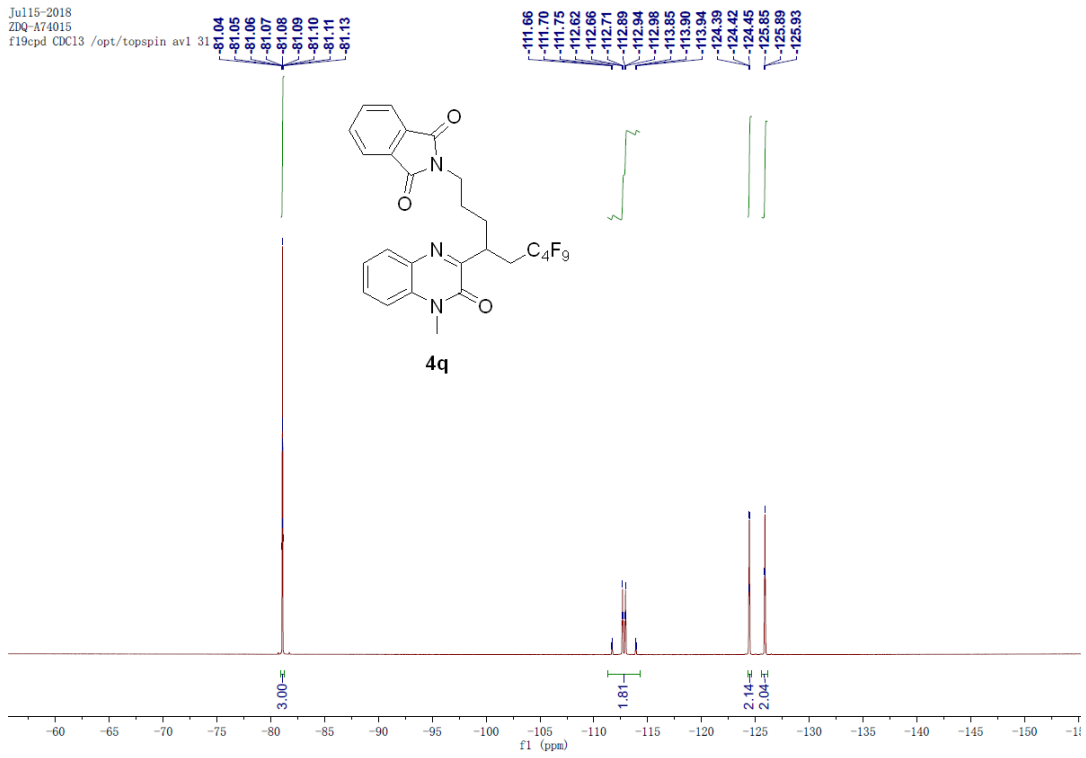

Jul18-2018  
 ZDQ-A75004-1  
 proton CDC13 /opt/topspin av1 4

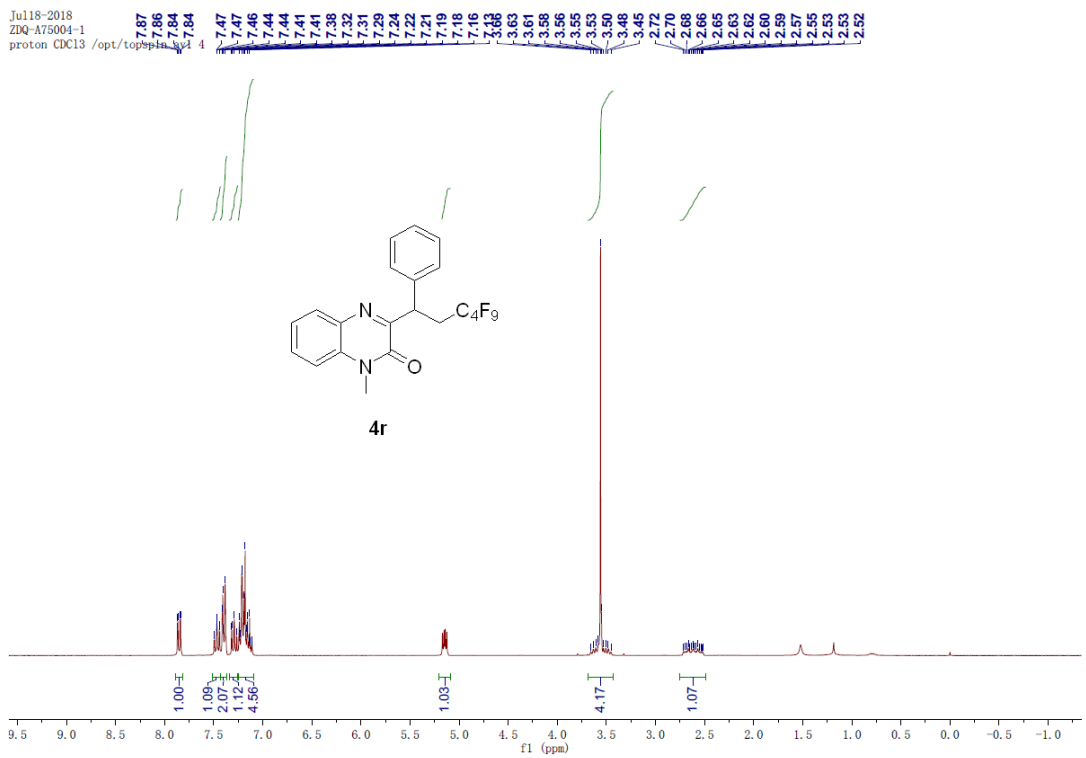

Jul26-2018  
ZDQ-A75004-1  
carbon CDCl3 /opt/pspin av1 44

156.61  
154.04  
139.80  
133.20  
132.37  
130.21  
130.19  
128.73  
128.41  
127.34  
123.65  
113.60

39.70  
34.95  
34.32  
34.04  
29.19

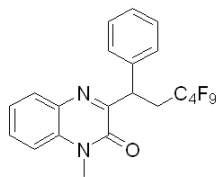

4r

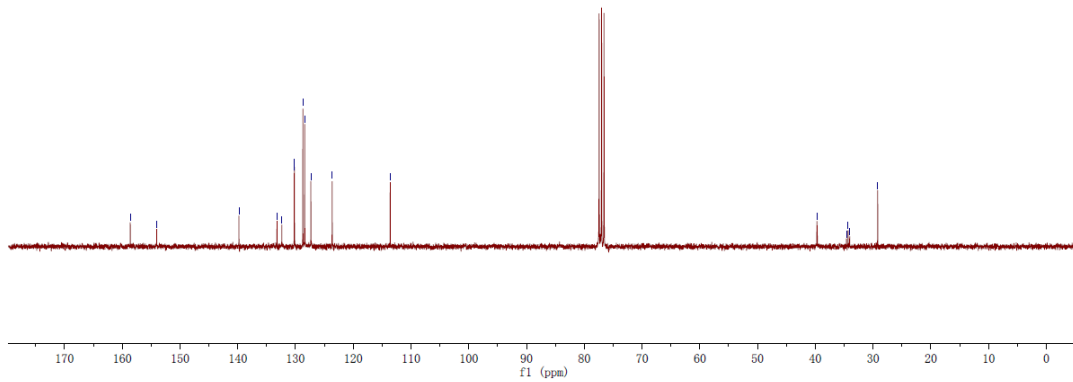

Jul18-2018  
ZDQ-A75004-1  
f19cpd CDCl3 /opt/topspin av1 4

80.98  
80.99  
81.00  
81.01  
81.02  
81.03  
81.05  
81.06  
81.07

111.42  
111.47  
111.51  
112.38  
112.43  
112.47  
113.35  
113.39  
113.43  
114.31  
114.35  
114.39  
124.43  
124.46  
125.78  
125.82  
125.84  
125.85

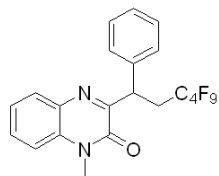

4r

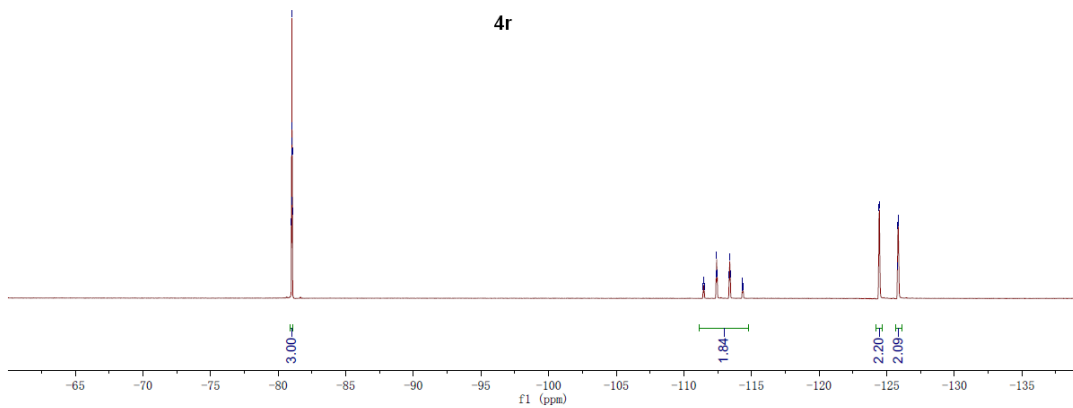

Jul26-2018  
ZDQ-A75009  
proton CDC13 /opt/topspin av1 51

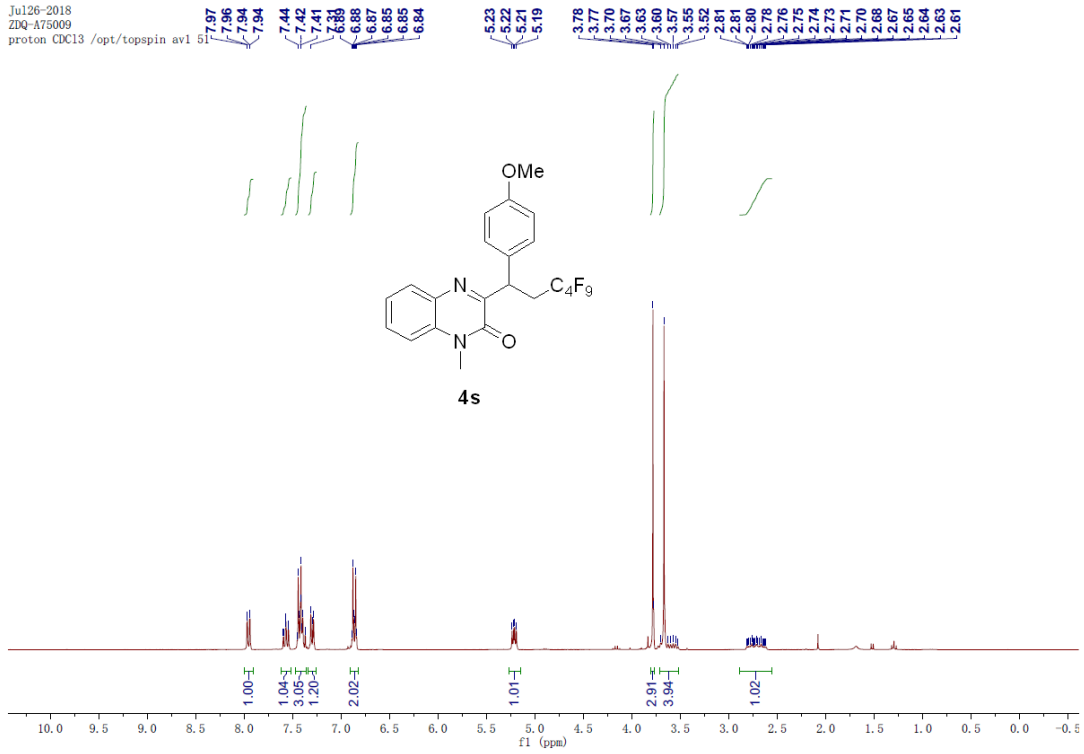

Jul26-2018  
ZDQ-A75009  
carbon CDC13 /opt/topspin

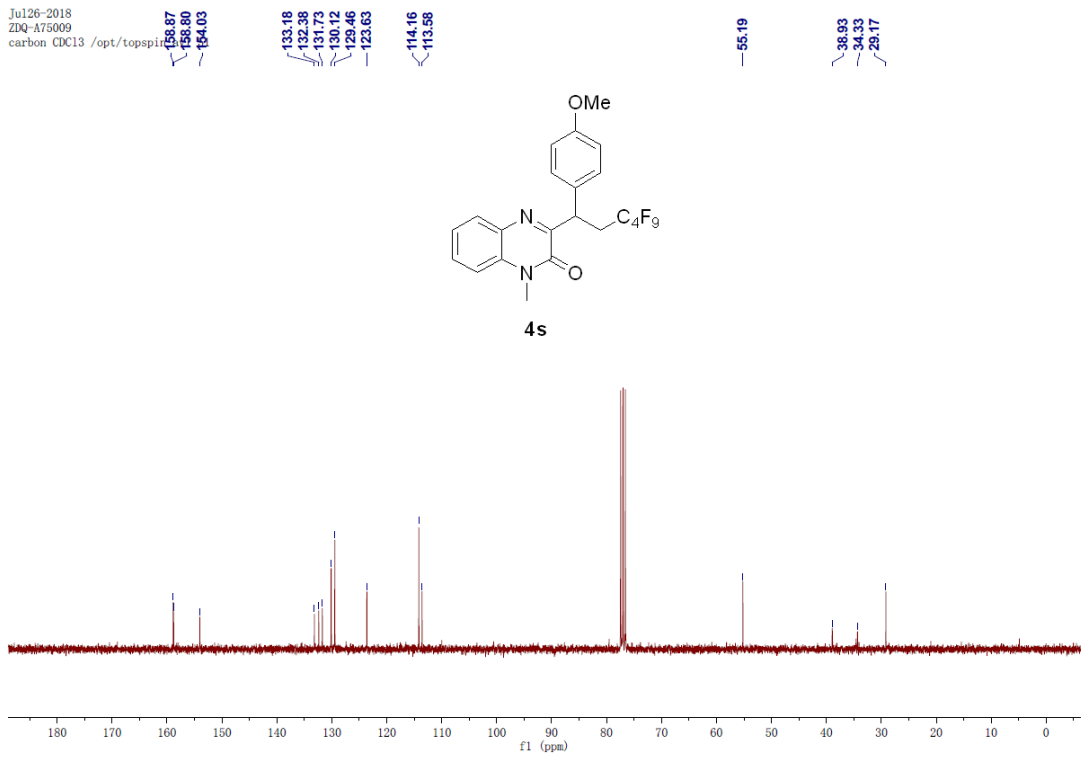

Jul26-2018  
 ZDQ-A75009  
 f19cpd CDC13 /opt/topspin av1 51

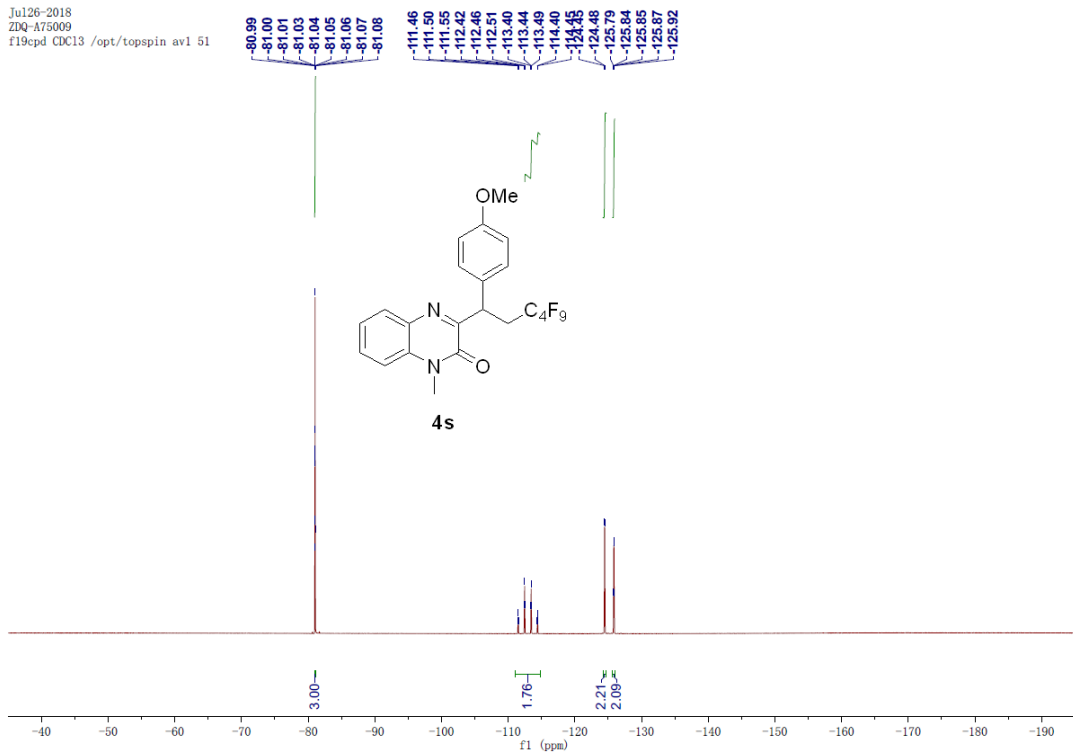

Jul18-2018  
 ZDQ-A75009  
 proton CDC13

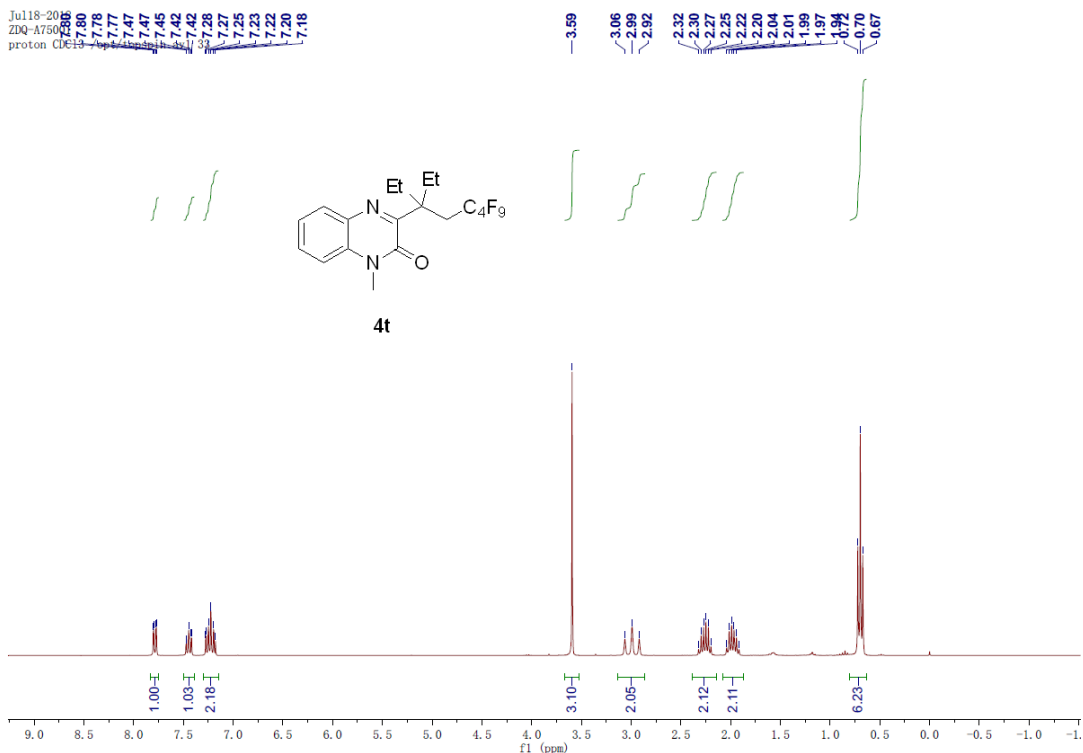

Jul18-2018  
ZDQ-A75001  
carbon CDC13 /opt/topspin av1

161.20  
153.76

133.07  
132.06  
130.42  
129.89  
123.31

113.35

47.27

32.59  
32.33  
32.08  
28.85  
25.69

7.80

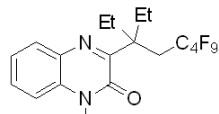

4t

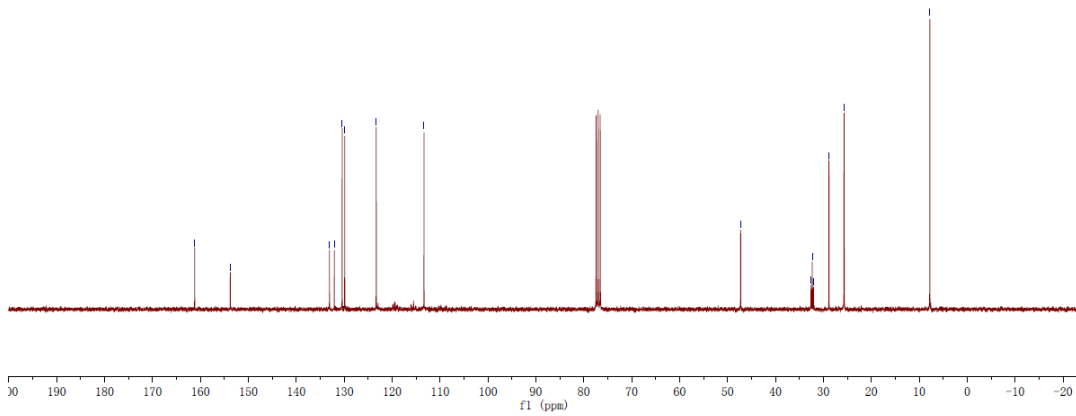

Jul18-2018  
ZDQ-A75001  
f19cpd CDC13 /opt/topspin av1 33

81.07  
81.08  
81.09  
81.10  
81.11  
81.12  
81.14  
81.15  
81.16

111.50  
111.55  
111.60  
124.35  
124.36  
124.60  
124.62  
124.64  
124.65  
124.91  
152.75  
152.76  
152.80  
152.80

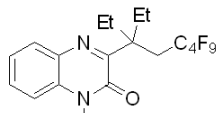

4t

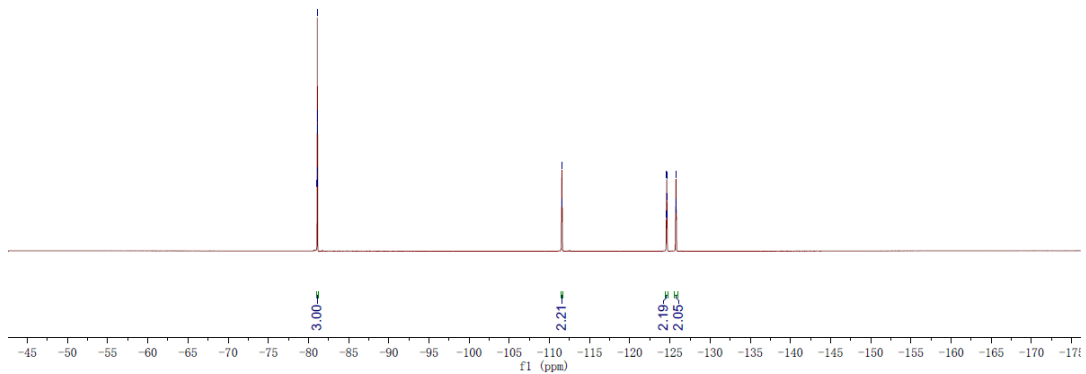

Jul18-2018  
ZDQ-A75006  
proton CDC13 /opt/topspin

7.81  
7.81  
7.78  
7.78  
7.48  
7.47  
7.45  
7.45  
7.43  
7.42  
7.28  
7.28  
7.25  
7.23  
7.20  
7.20  
7.18

3.59  
3.08  
3.01  
2.94  
2.46  
2.44  
2.44  
2.44  
1.86  
1.84  
1.82  
1.80  
1.62  
1.61  
1.58  
1.57  
1.54  
1.52  
1.51  
1.43  
1.42  
1.40  
1.38

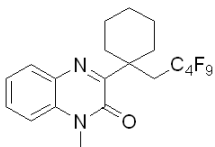

4u

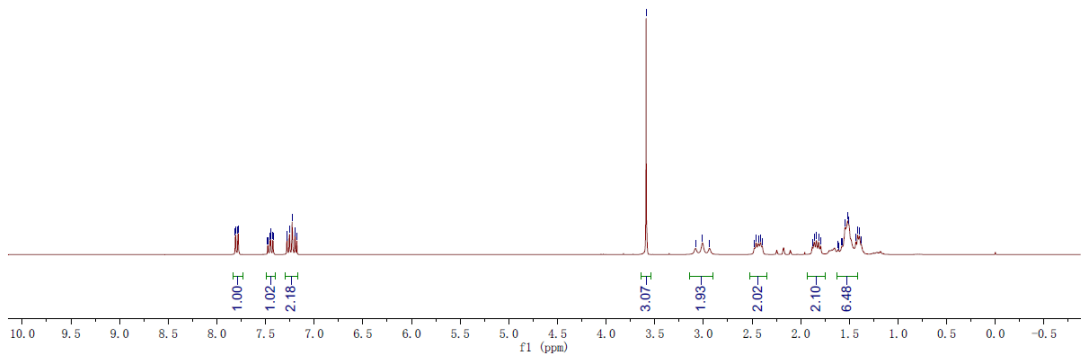

Jul18-2018  
ZDQ-A75006  
carbon CDC13 /opt/topspin

161.20  
153.82  
133.10  
132.24  
130.36  
129.91  
123.33  
113.35

44.22  
35.67  
35.41  
35.15  
34.87  
26.82  
26.23  
22.26

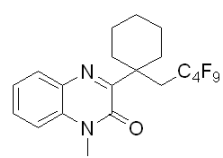

4u

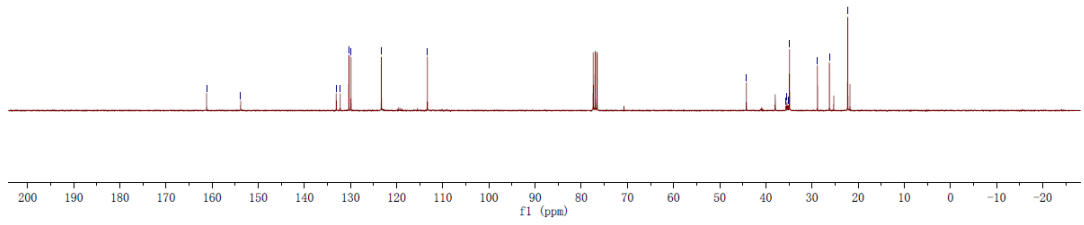

Jul18-2018  
 ZDQ-A75006  
 f19cpd CDC13 /opt/topspin av1 34

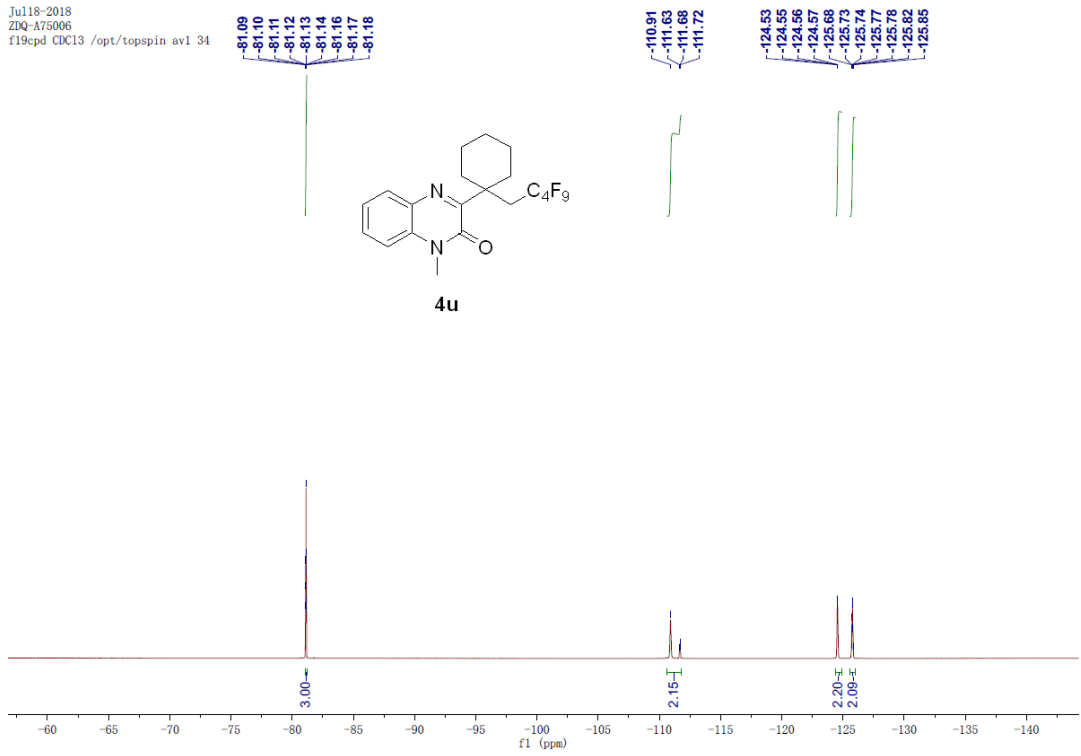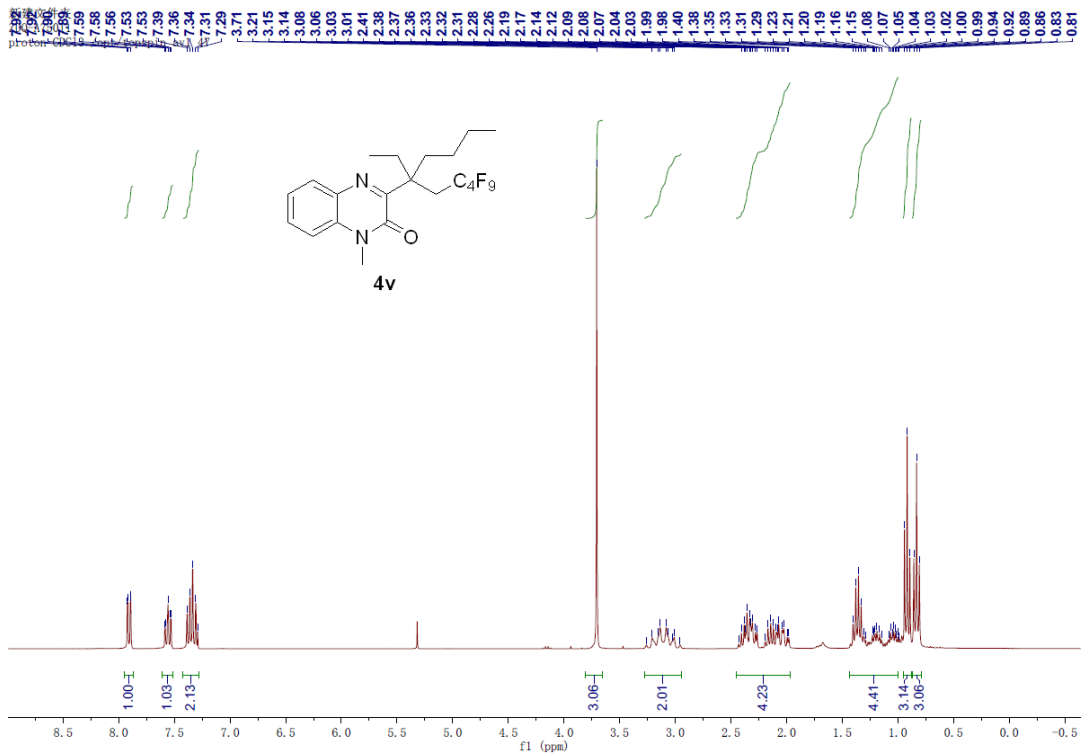

新建文件夹  
ZDQ-A75011  
carbon CDC13 /opt/topspin av1

151.31  
153.71

133.07  
132.02  
130.42  
129.85  
123.27

113.33

47.08

33.00  
32.92  
32.66  
32.41  
28.85  
26.23  
25.68  
23.15  
13.98  
7.90

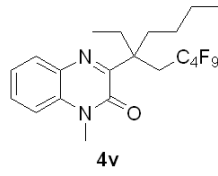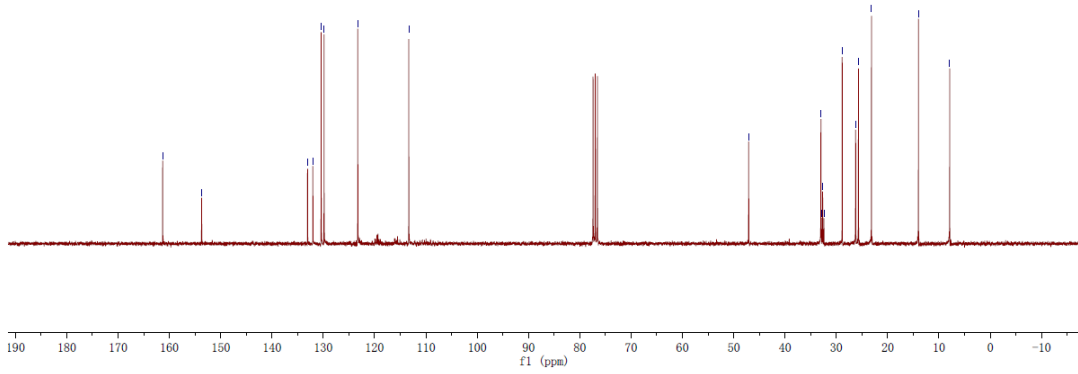

新建文件夹  
ZDQ-A75011  
f19cpd CDC13 /opt/topspin av1

81.09  
81.10  
81.11  
81.12  
81.13  
81.14  
81.16  
81.17  
81.18

111.90  
111.95  
111.99

124.57  
124.61  
124.62  
124.64  
124.66  
124.68  
125.70  
125.73  
125.77  
125.78  
125.82  
125.85

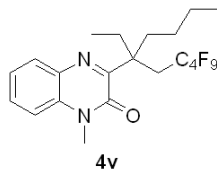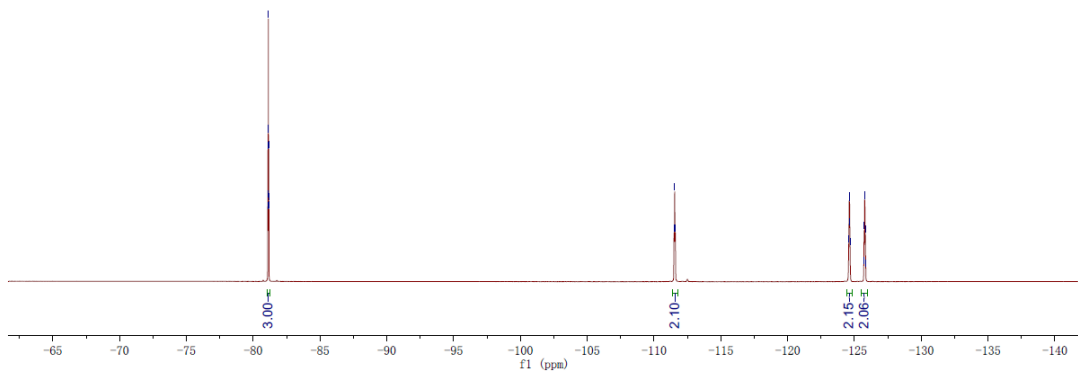



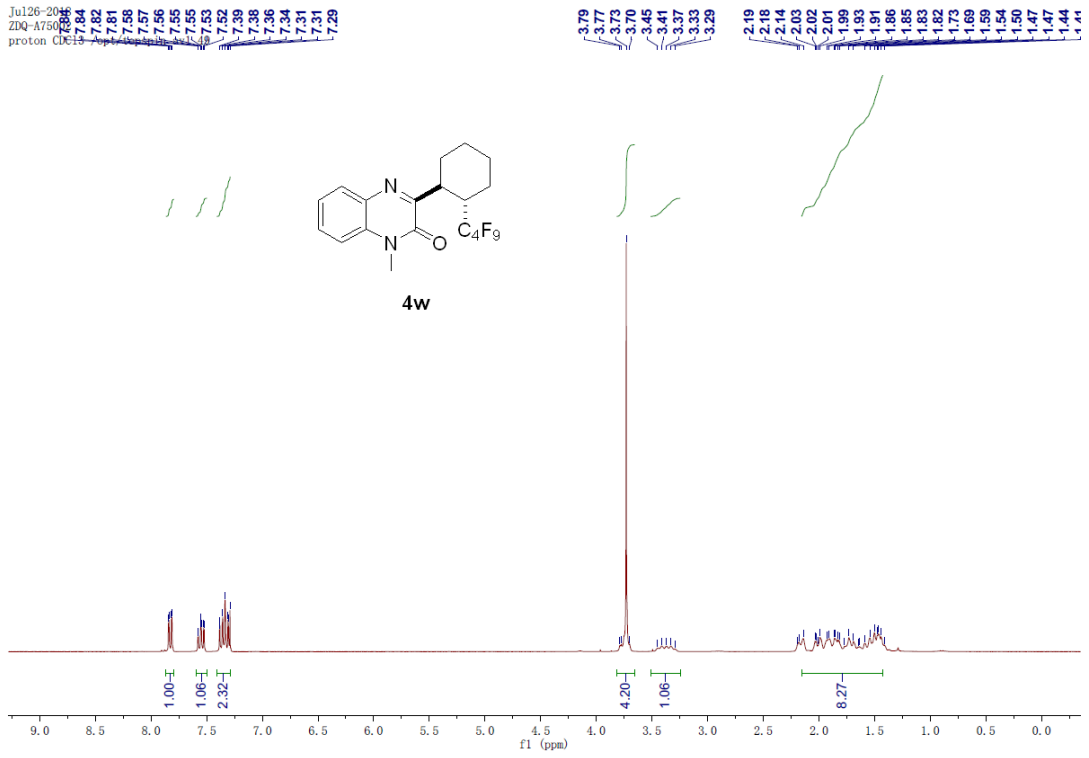

zdq75002\_150818\_299k\_1h-bb-fdec\_1  
 zdq75002\_150818\_299k\_1h-bb-fdec\_1  
 dir: /mdata/studer/zdq75002  
 600 MHz, probe: hfx, temp: 299 K

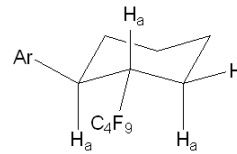

zdq75002\_150818\_299k\_1h-bb-fdec\_1  
 zdq75002\_150818\_299k\_1h-bb-fdec\_1  
 dir: /mdata/studer/zdq75002  
 600 MHz, probe: hfx, temp: 299 K

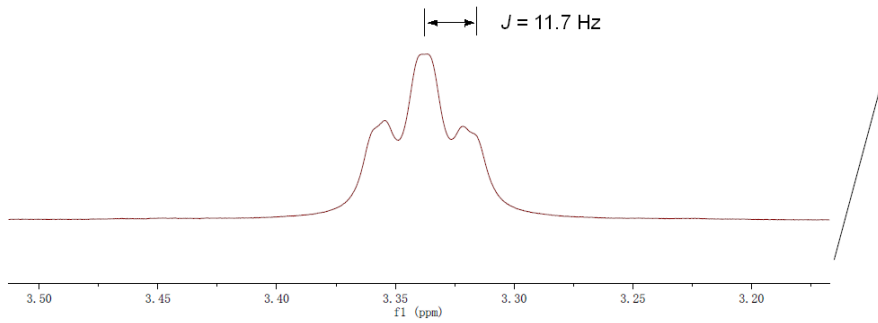

Jul26-2018  
ZDQ-A75002  
carbon CDC13 /opt/topspin

152.36

154.21

132.95

132.65

128.64

123.51

113.54

41.94

41.72

41.67

41.45

39.20

31.72

29.12

25.01

24.90

24.57

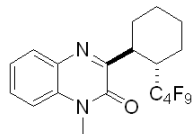

4w

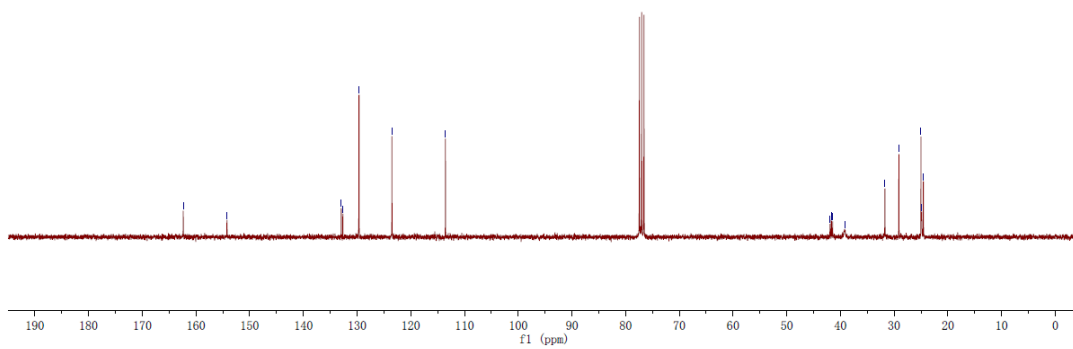

Jul26-2018  
ZDQ-A75002  
f19cpd CDC13 /opt/topspin av1 49

80.90

80.91

80.92

80.94

80.95

80.96

80.97

80.98

80.99

106.22

106.31

106.38

107.21

107.29

107.37

118.11

119.10

120.18

121.21

121.21

121.43

121.46

121.49

122.50

122.53

124.34

124.36

124.37

124.42

124.43

124.45

125.38

125.39

125.41

125.45

125.47

125.48

126.77

126.79

126.83

126.85

126.90

127.82

127.86

127.88

127.94

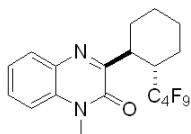

4w

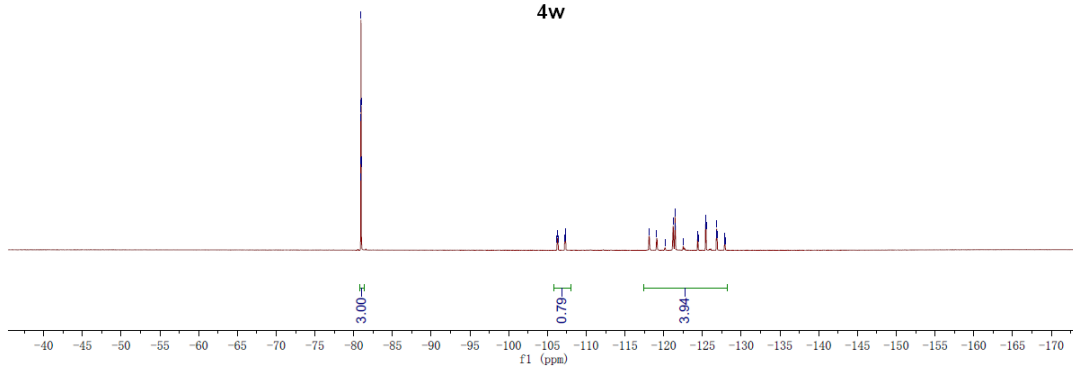

Aug09-2018  
ZDQ-A75010  
proton CDC13 /opt/top

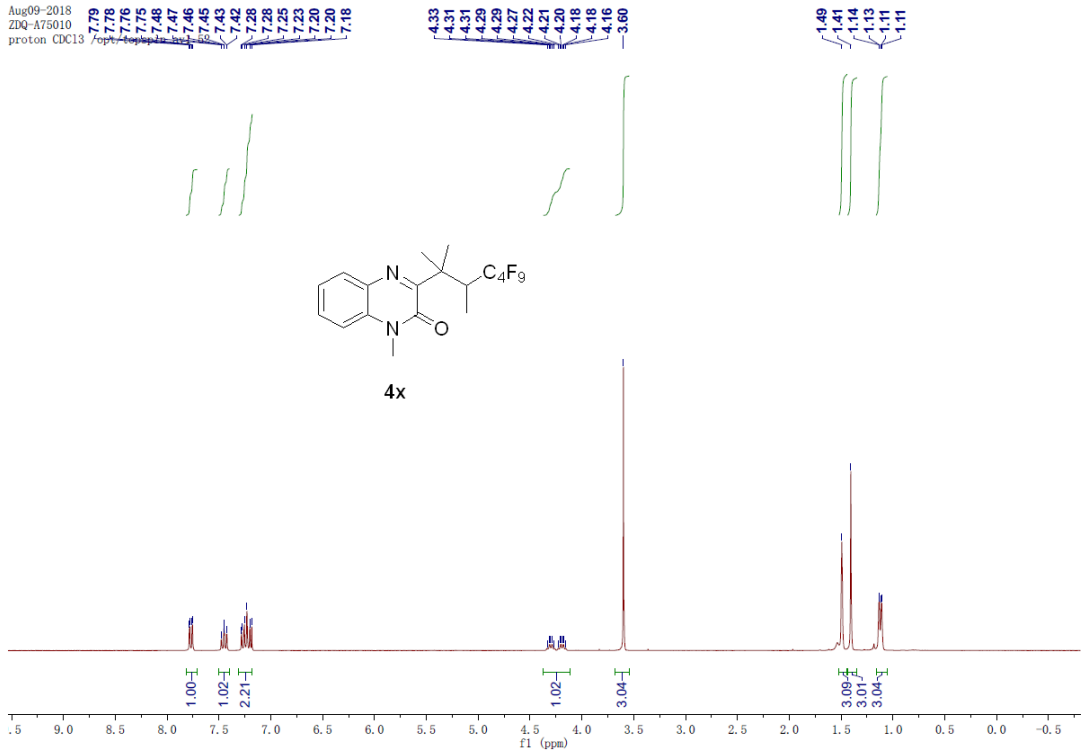

Aug09-2018  
ZDQ-A75010  
carbon CDC13 /opt/top

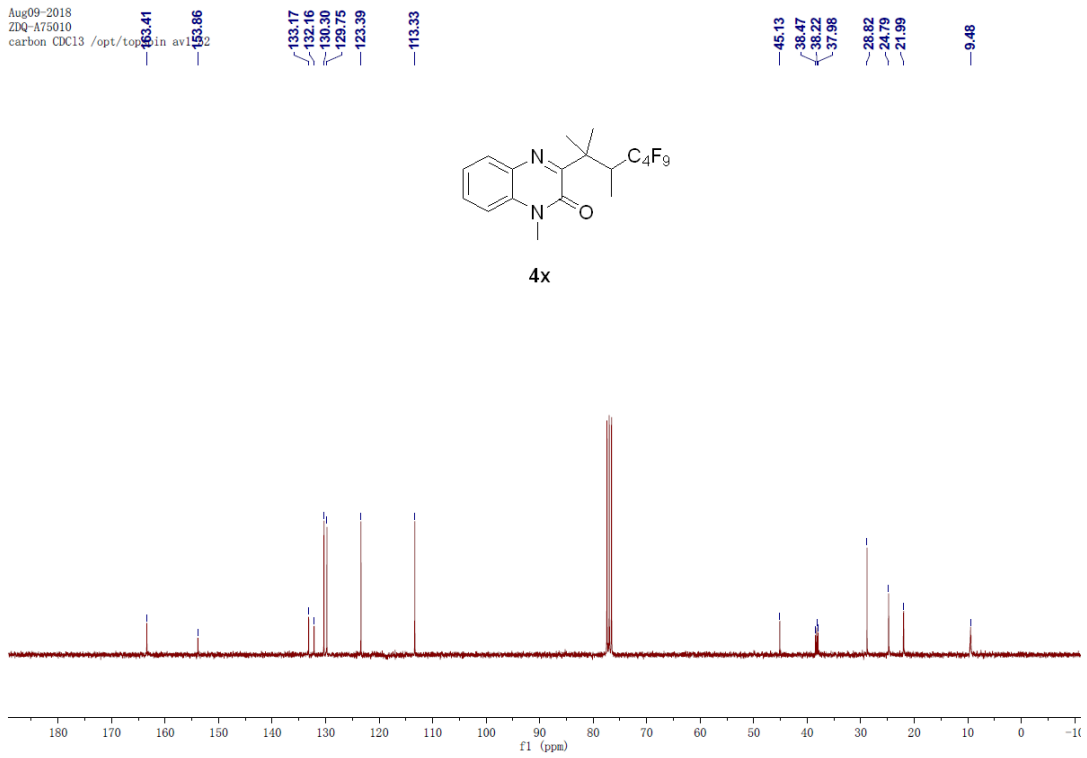

Aug09-2018  
ZDQ-A75010  
f19epd CDC13 /opt/topspin av1 52

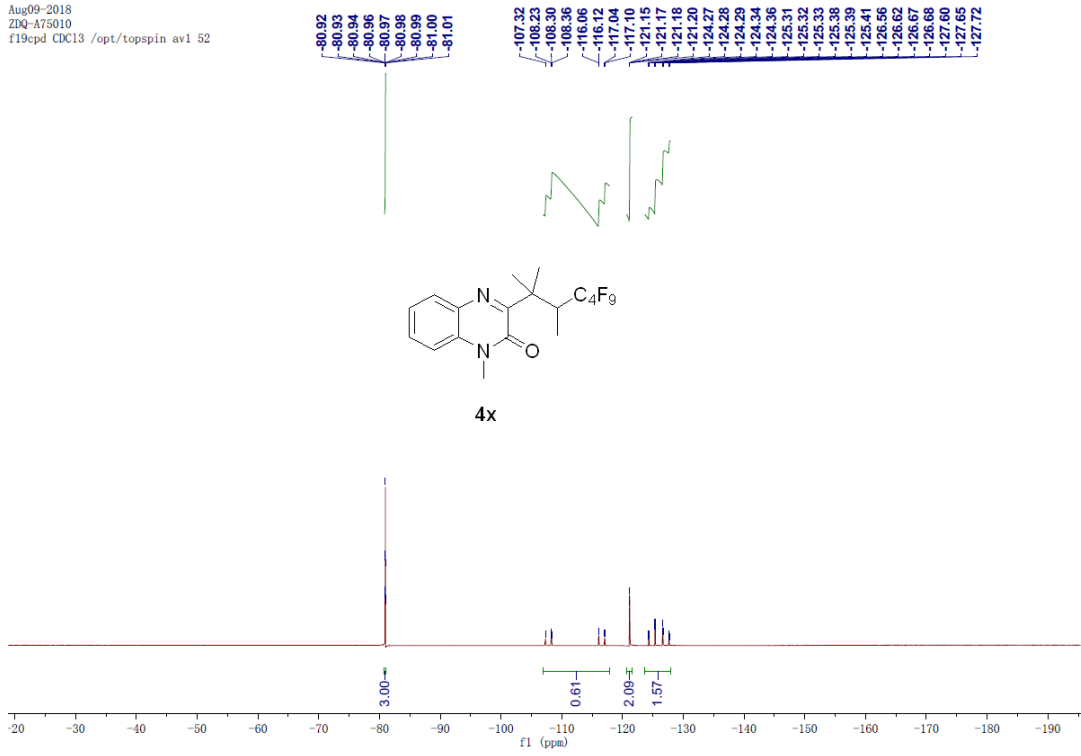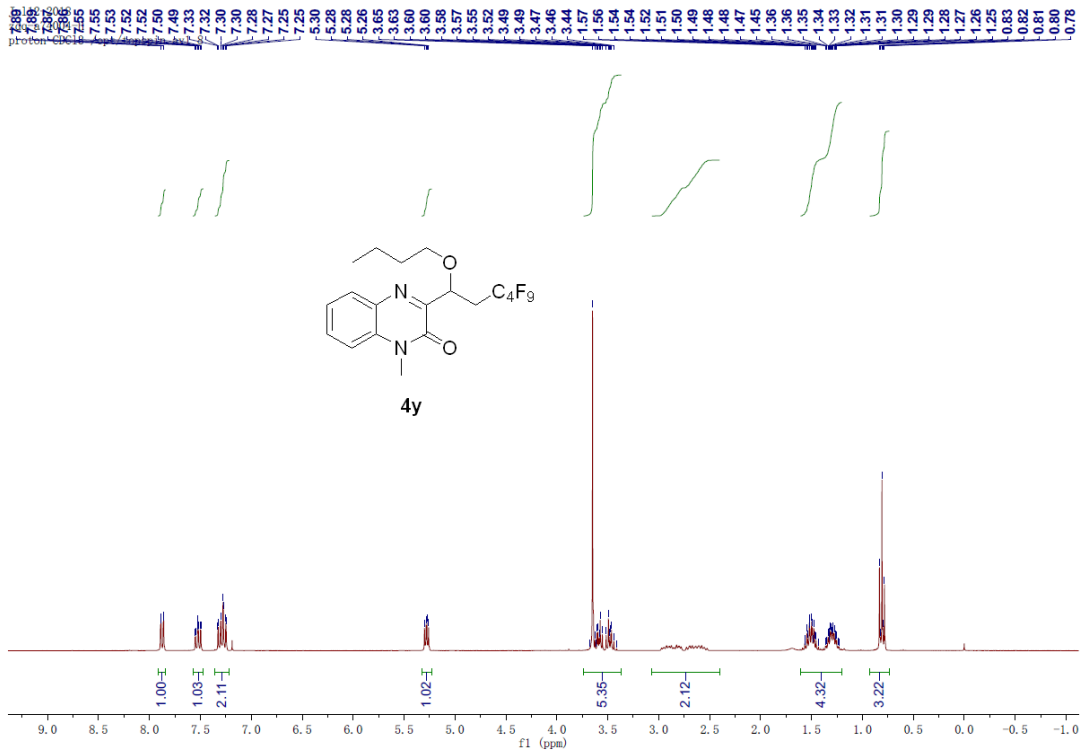

Jul13-2018  
ZDQ-A74004  
carbon CDCl3 /opt/topspin a

156.56  
154.23

133.45  
132.44  
130.98  
130.70  
123.86

113.65

71.25  
70.64

34.35  
34.06  
33.81  
31.62  
29.05

19.08  
13.71

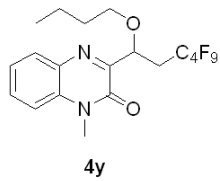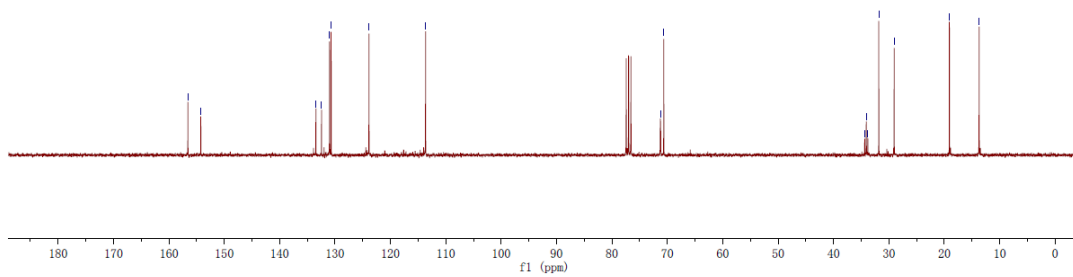

Jul13-2018  
ZDQ-A74004  
f19cpd CDCl3 /opt/topspin av1 43

81.04  
81.05  
81.06  
81.07  
81.09  
81.10  
81.11  
81.12  
81.13

111.10  
111.15  
111.20  
112.06  
112.07  
112.11  
112.15  
112.16  
113.02  
113.06  
113.11  
113.98  
114.02  
114.07  
124.45  
124.48  
124.51  
124.54  
125.84  
125.88  
125.91

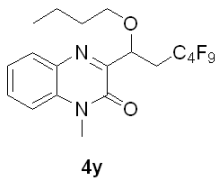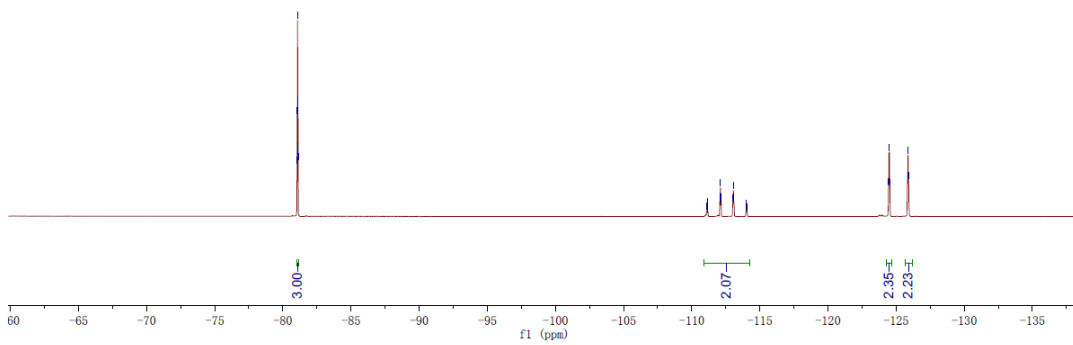

Jul15-2018  
 ZDQ-A74018  
 proton\*CDCl3

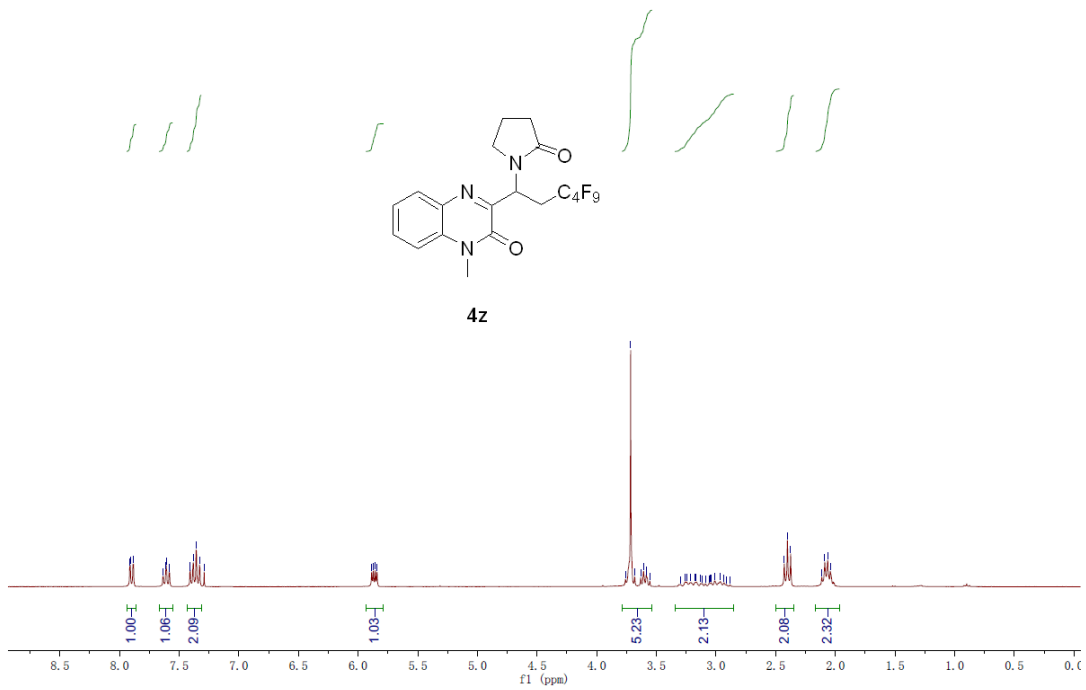

Jul15-2018  
 ZDQ-A74018  
 carbon CDC13 /opt/topspin av1 34

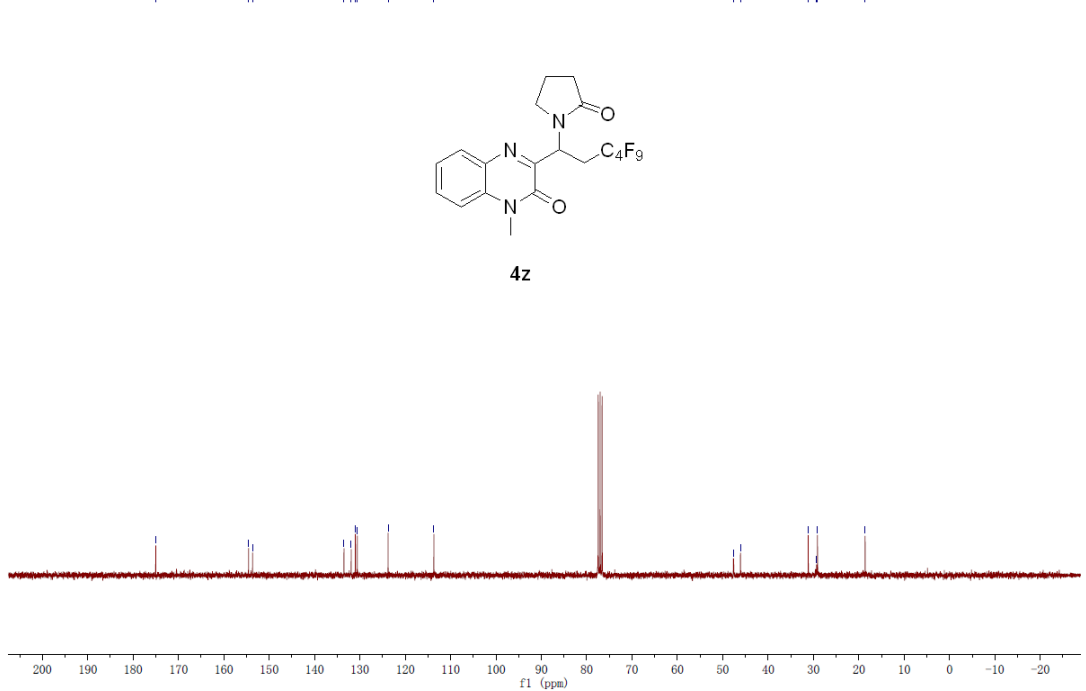

Jul15-2018  
ZDQ-A74018  
f19epd CDC13 /opt/topspin av1 34

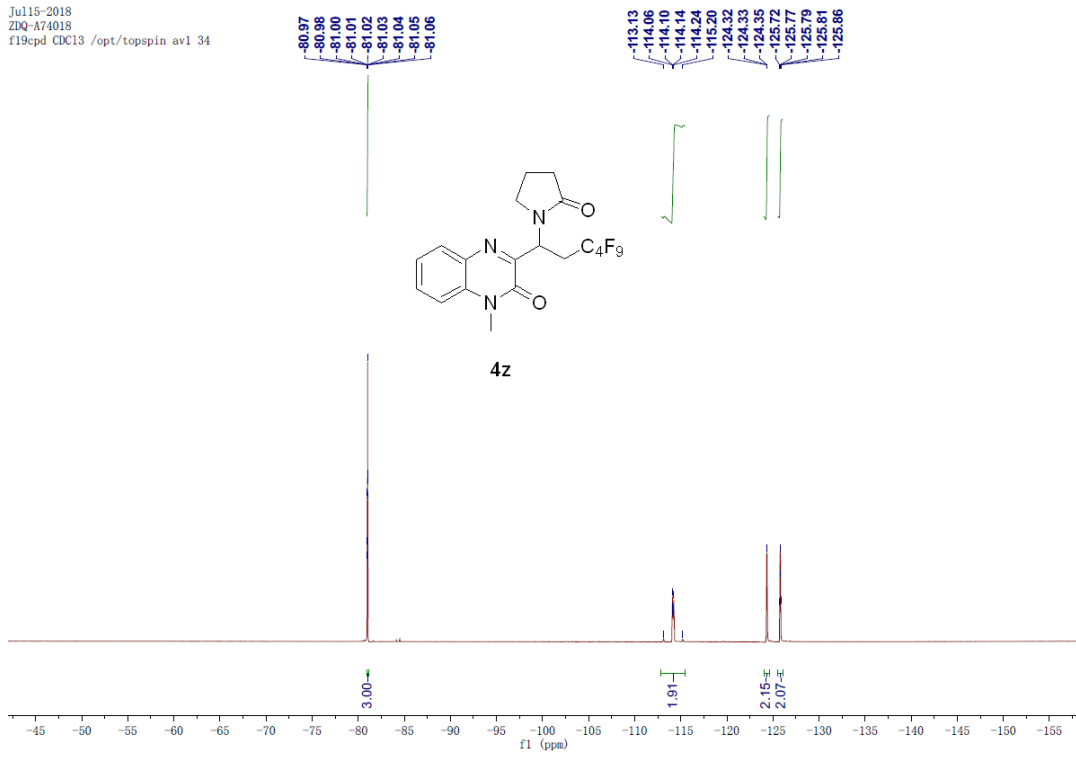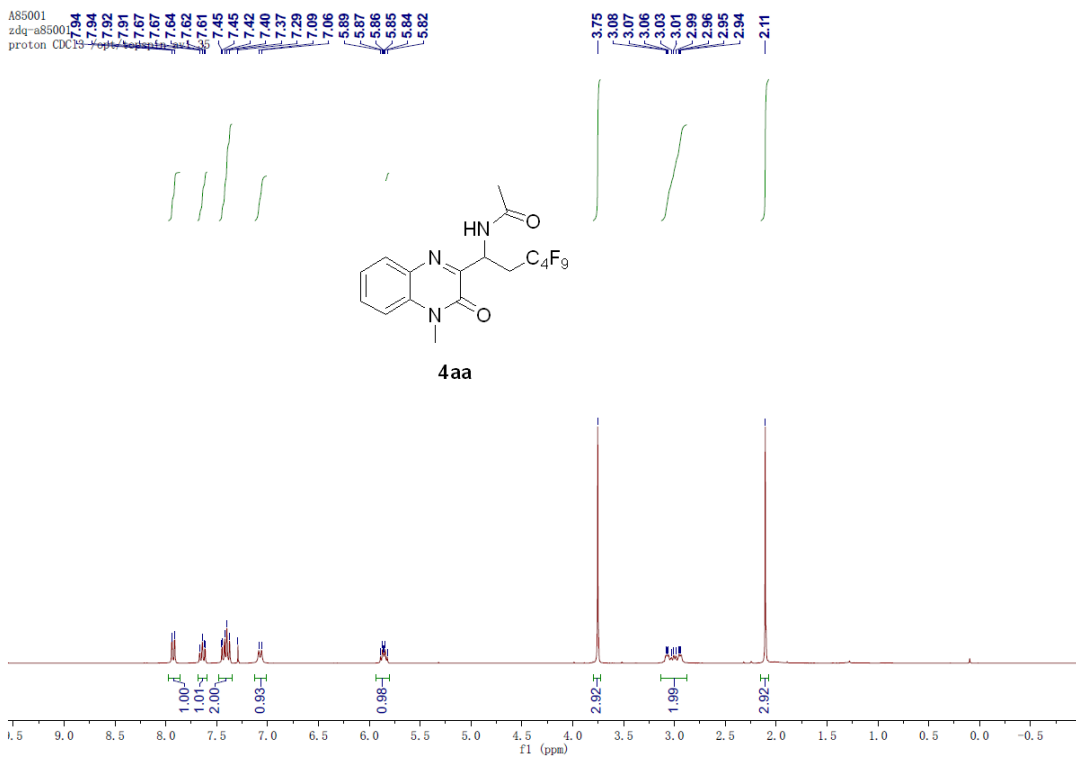

A85001  
zdq-e85001  
carbon\_256 CDC13

166.24  
155.11  
153.71  
133.27  
132.03  
131.04  
130.33  
124.10  
113.82

47.10  
32.69  
32.43  
32.17  
29.07  
23.36

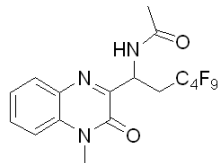

4aa

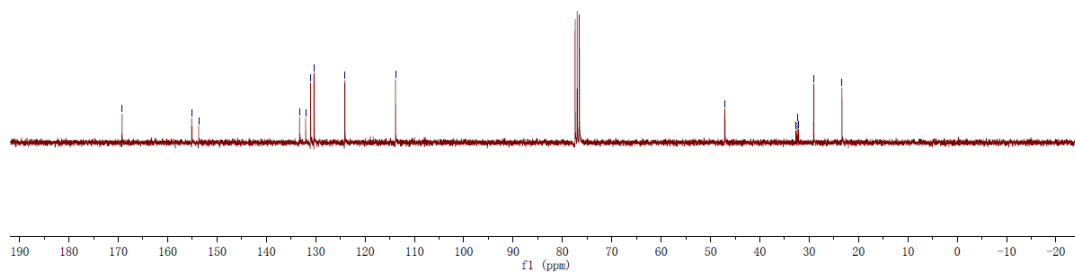

A85001  
zdq-e85001  
f19cpd CDC13 /opt/topspin av1

81.04  
81.05  
81.06  
81.07  
81.08  
81.09  
81.11  
81.12  
81.13

111.31  
111.35  
111.40  
112.27  
112.32  
112.36  
113.41  
113.45  
113.49  
114.37  
114.41  
114.46  
124.42  
124.45  
124.46  
124.48  
124.49  
125.88  
125.92  
125.96

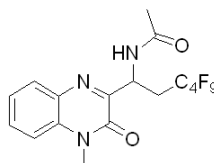

4aa

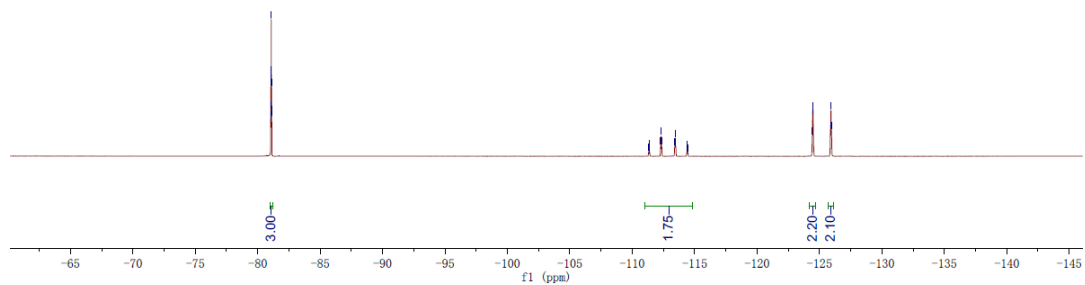



Aug09-2018  
ZDQ-A77001  
proton CDC13 /opt/topspin av1 44

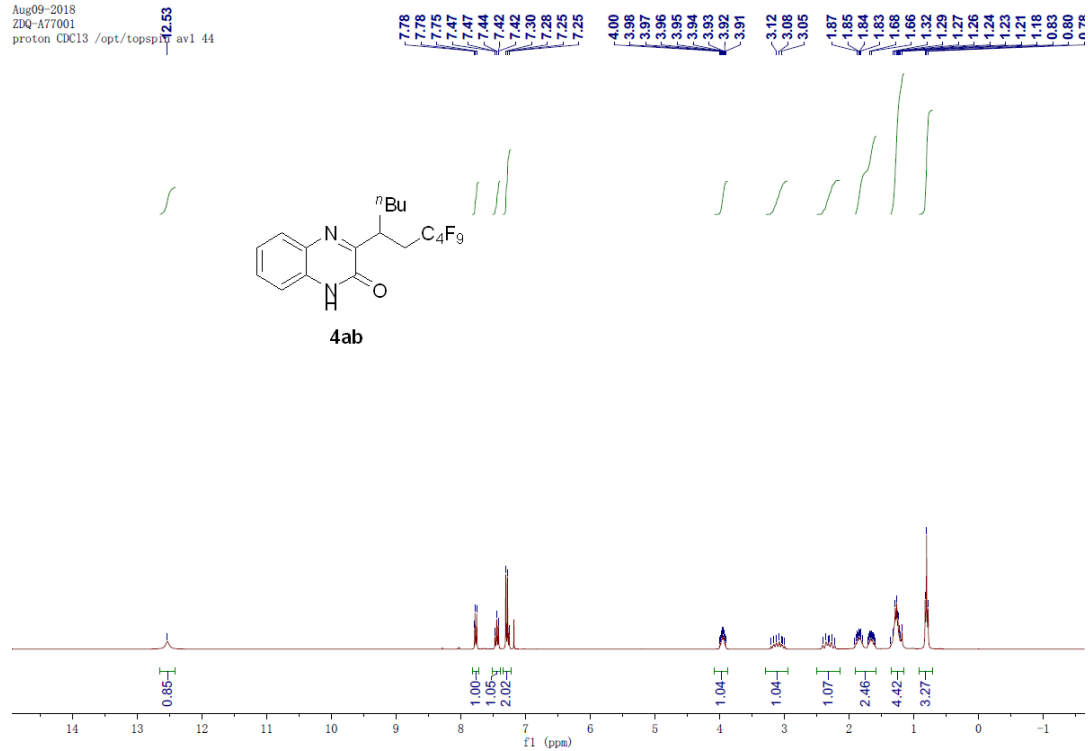

Aug09-2018  
ZDQ-A77001  
carbon CDC13 /opt/topspin av1 44

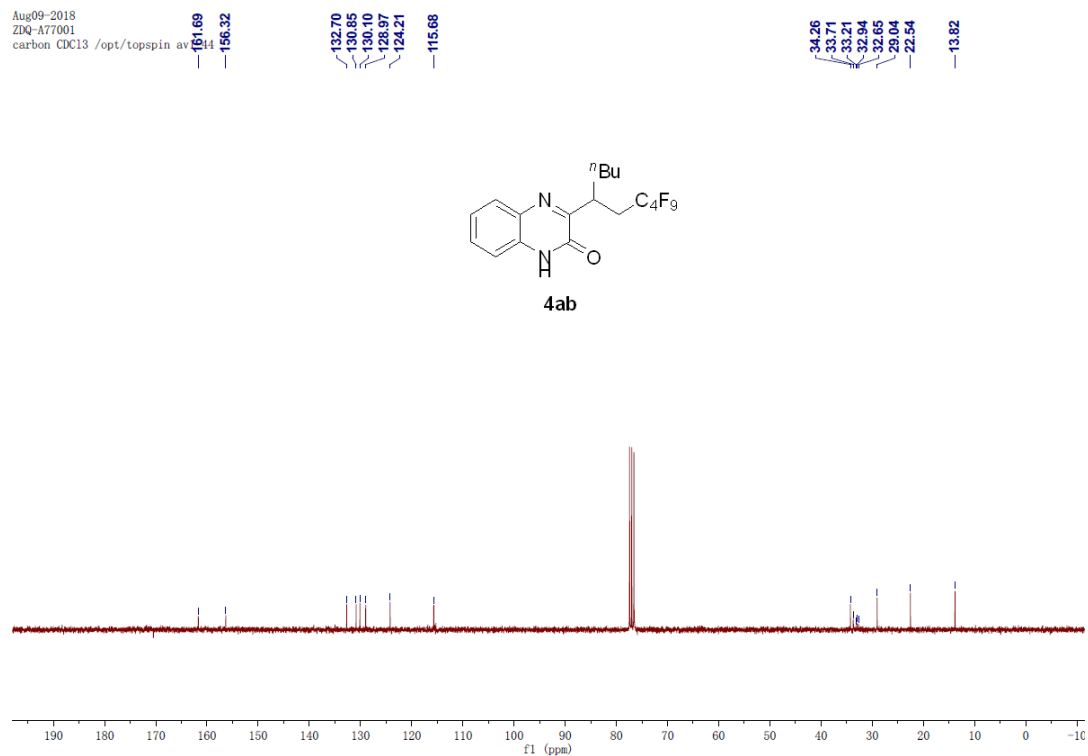

Aug09-2018  
ZDQ-A77001  
f19cpd CDC13 /opt/topspin a

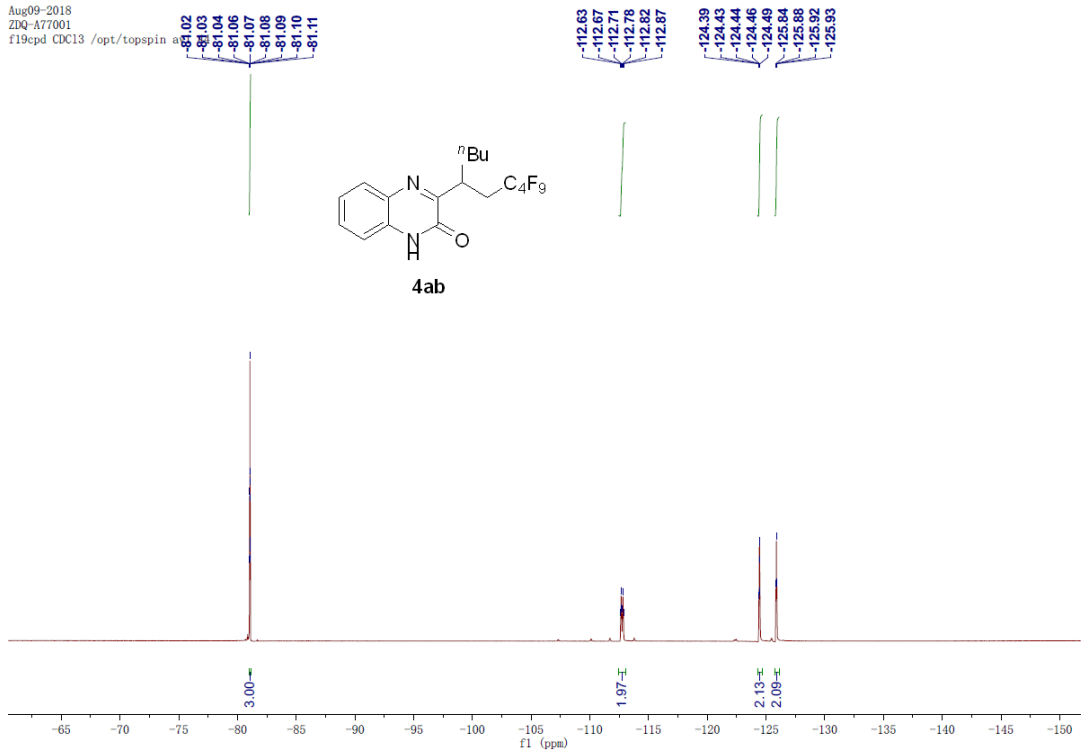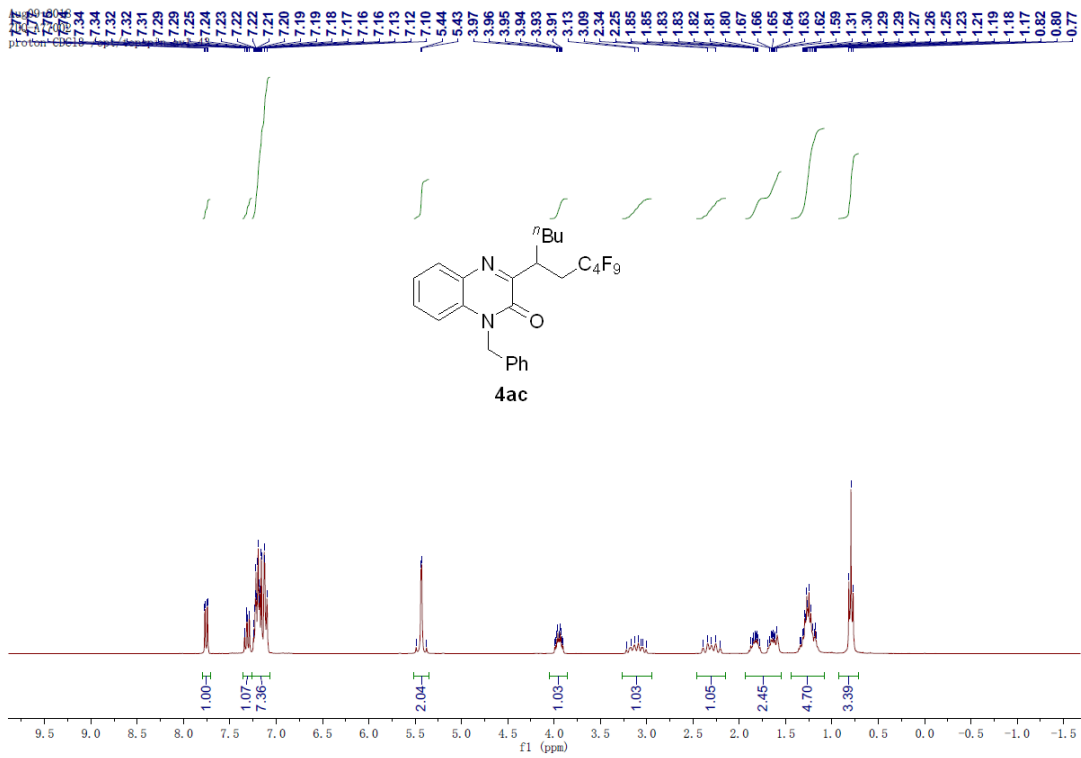

Aug09-2018  
ZDQ-A77002  
carbon CDC13 /opt/topspi

161.37  
154.55  
135.28  
132.79  
132.34  
130.04  
128.96  
128.95  
127.67  
126.72  
123.62  
114.40

45.88  
34.76  
34.27  
33.13  
32.86  
32.58  
29.22  
22.99  
13.87

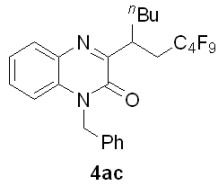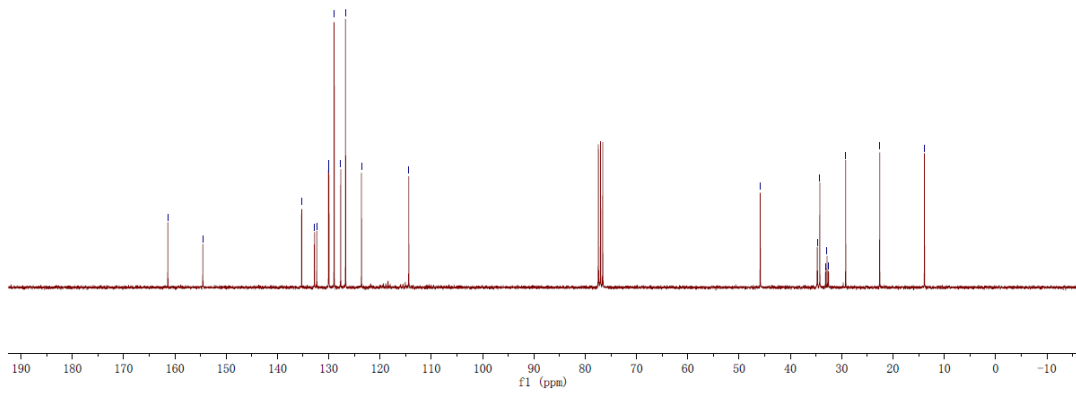

Aug09-2018  
ZDQ-A77002  
f19cpd CDC13 /opt/topspi

81.01  
81.02  
81.03  
81.04  
81.05  
81.06  
81.08  
81.09  
81.10  
111.60  
112.52  
112.56  
112.61  
112.70  
112.75  
112.79  
113.66  
113.71  
124.38  
124.42  
124.43  
124.45  
124.48  
125.83  
125.87  
125.91

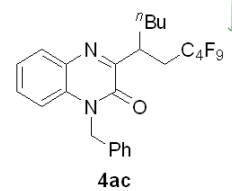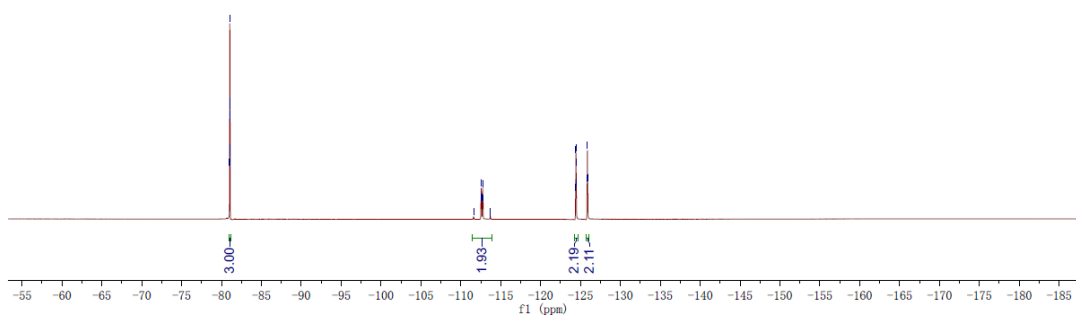

7.78  
7.76  
7.75  
7.45  
7.43  
7.43  
7.42  
7.40  
7.29  
7.29  
7.26  
7.24  
7.18  
7.02  
7.02  
6.99  
6.99  
5.05  
4.99  
4.92  
4.87  
4.18  
4.15  
4.13  
4.11  
3.90  
3.88  
3.87  
3.86  
3.85  
3.84  
3.04  
2.32  
2.23  
2.23  
1.82  
1.81  
1.80  
1.78  
1.77  
1.76  
1.62  
1.60  
1.59  
1.58  
1.58  
1.56  
1.30  
1.29  
1.26  
1.25  
1.25  
1.23  
1.22  
1.21  
1.19  
1.18  
1.15  
1.13  
0.81  
0.80  
0.78  
0.76

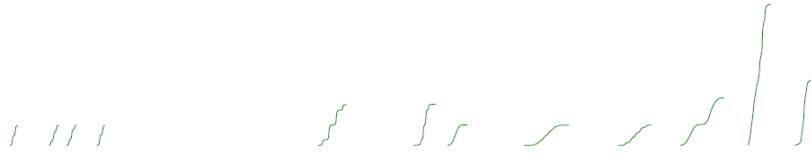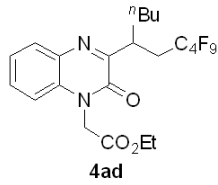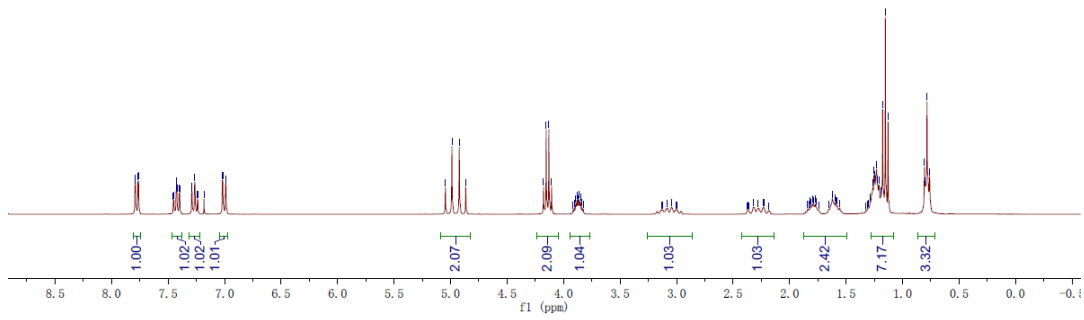

Aug09-2018  
ZD4-177003  
carbon CDC13 /opt/topspin

166.98  
161.03  
154.01  
132.55  
130.24  
130.16  
123.86  
113.01  
62.00  
43.65  
34.58  
34.13  
32.68  
29.05  
22.52  
13.91  
13.79

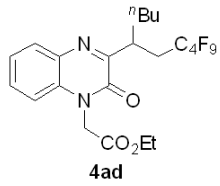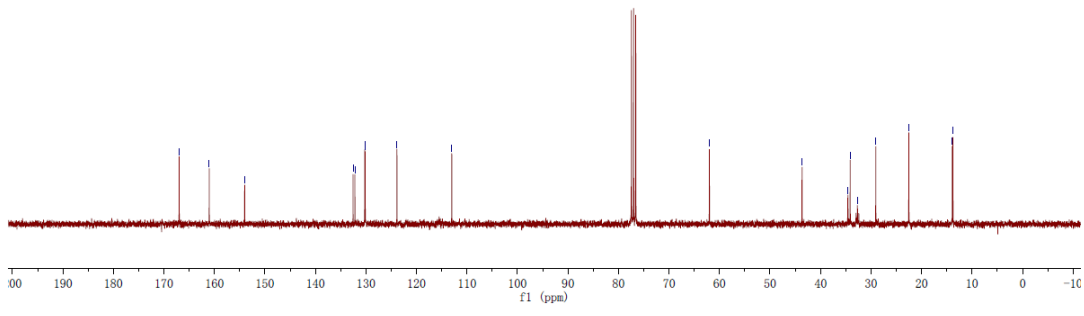

Aug09-2018  
 ZDQ-A77003  
 f19epd CDC13 /opt/topspin av1 45

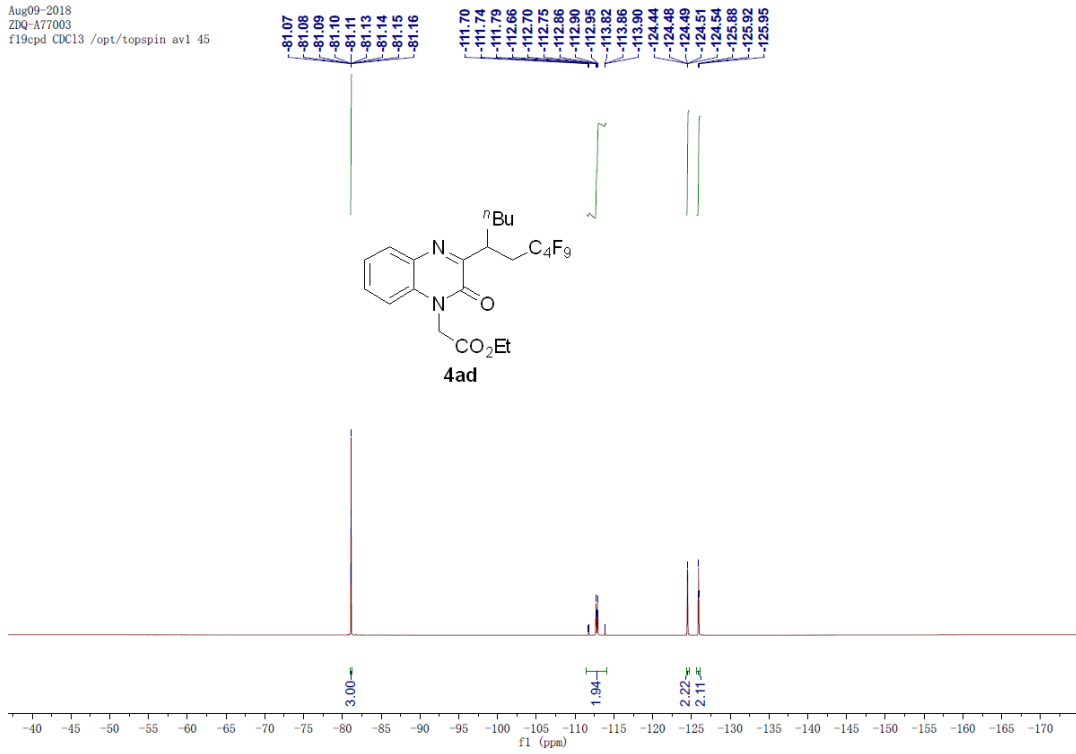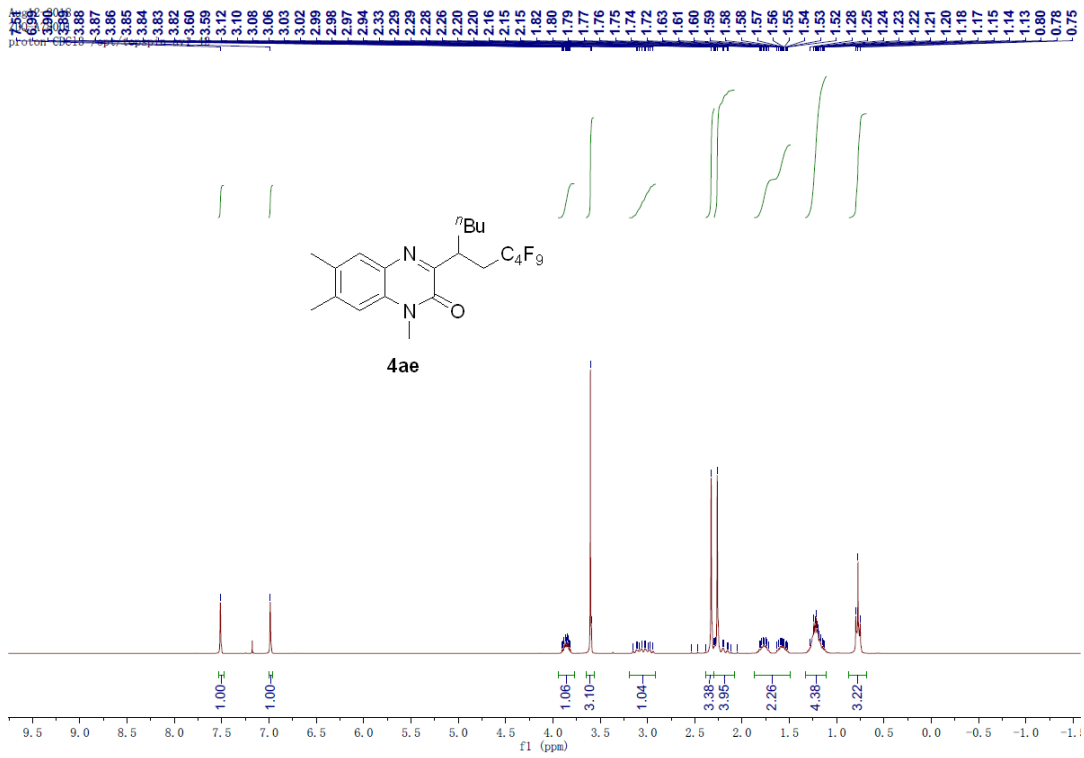

Aug12-2018  
ZDQ-A78001  
carbon CDC13 /opt/topspic

153.82  
154.48

139.75  
132.45  
131.07  
130.93  
130.01

114.15

34.49  
34.13  
32.93  
32.65  
32.37  
29.07  
29.04  
22.57  
20.40  
19.01  
13.82

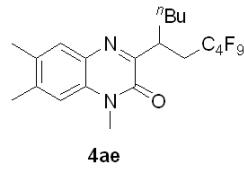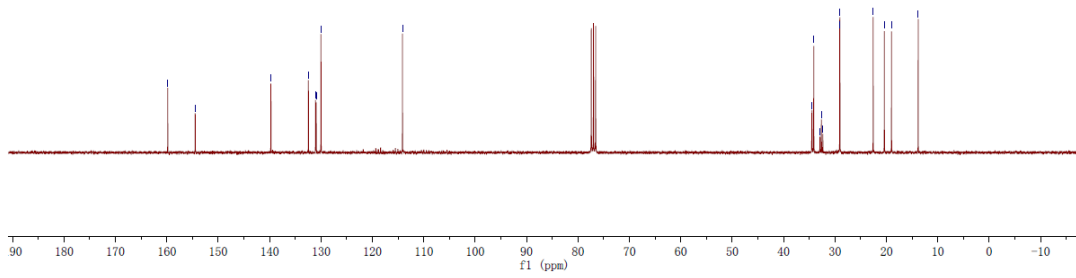

Aug12-2018  
ZDQ-A78001  
f19cpd CDC13 /opt/topspic

81.06  
81.07  
81.09  
81.10  
81.11  
81.12  
81.13  
81.14  
81.16

111.73  
111.78  
111.82  
112.69  
112.74  
112.78  
112.95  
112.99  
113.04  
113.91  
113.95  
113.99  
124.42  
124.45  
124.48  
124.51  
125.83  
125.86  
125.90  
125.94  
125.95

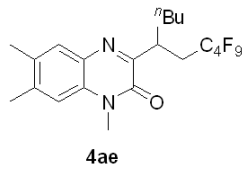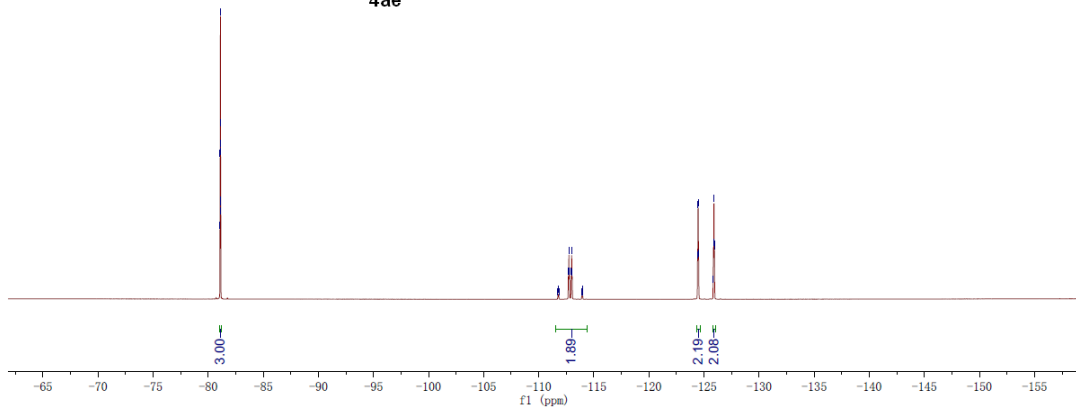

Aug12-2018  
ZDQ-A78002  
proton CDC13 /opt/topspin av1 43

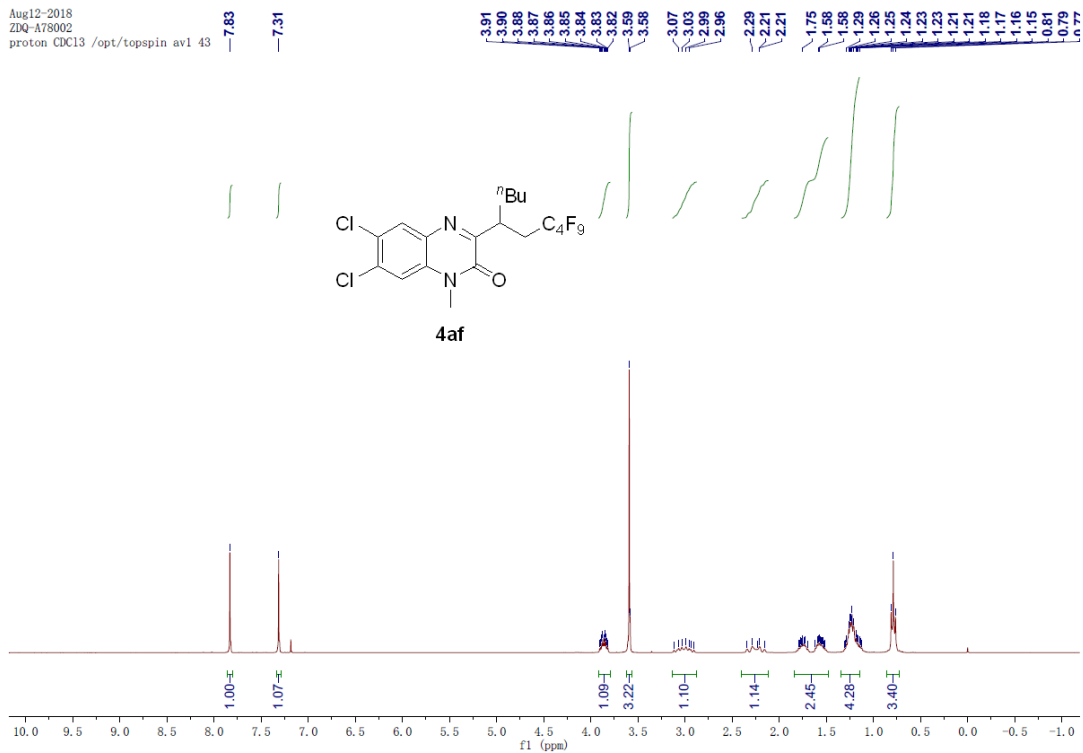

Aug12-2018  
ZDQ-A78002  
carbon CDC13 /opt/topspin av1 43

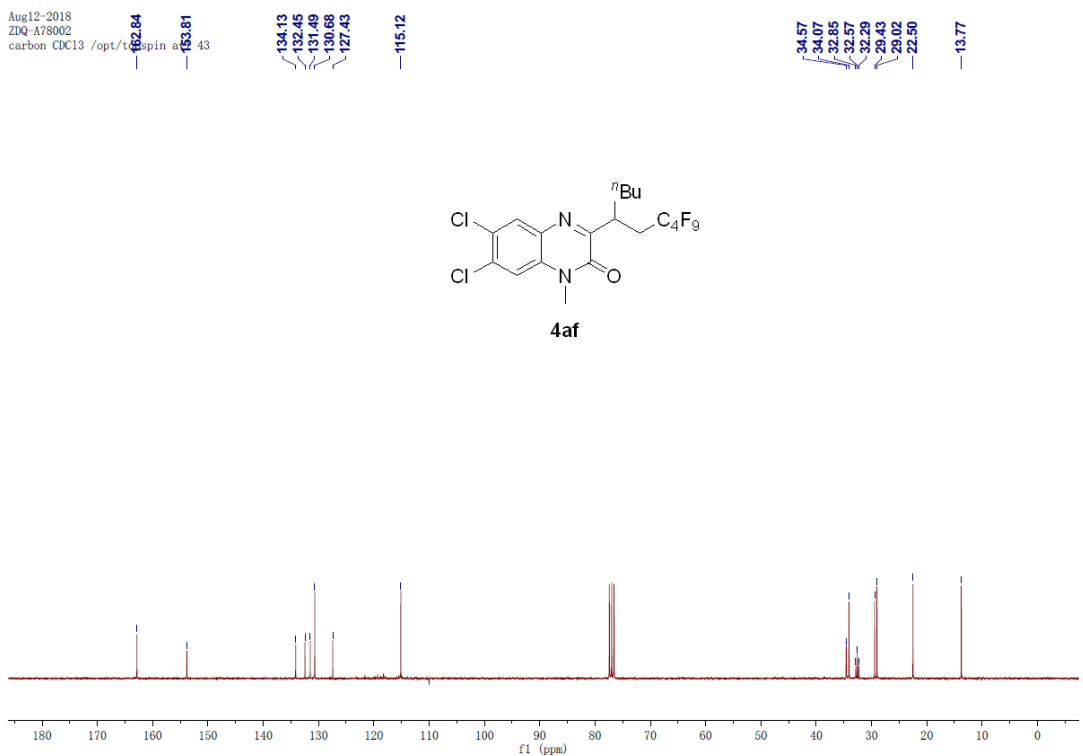

Aug12-2018  
ZDQ-A78002  
f19epd CDC13 /opt/topsp

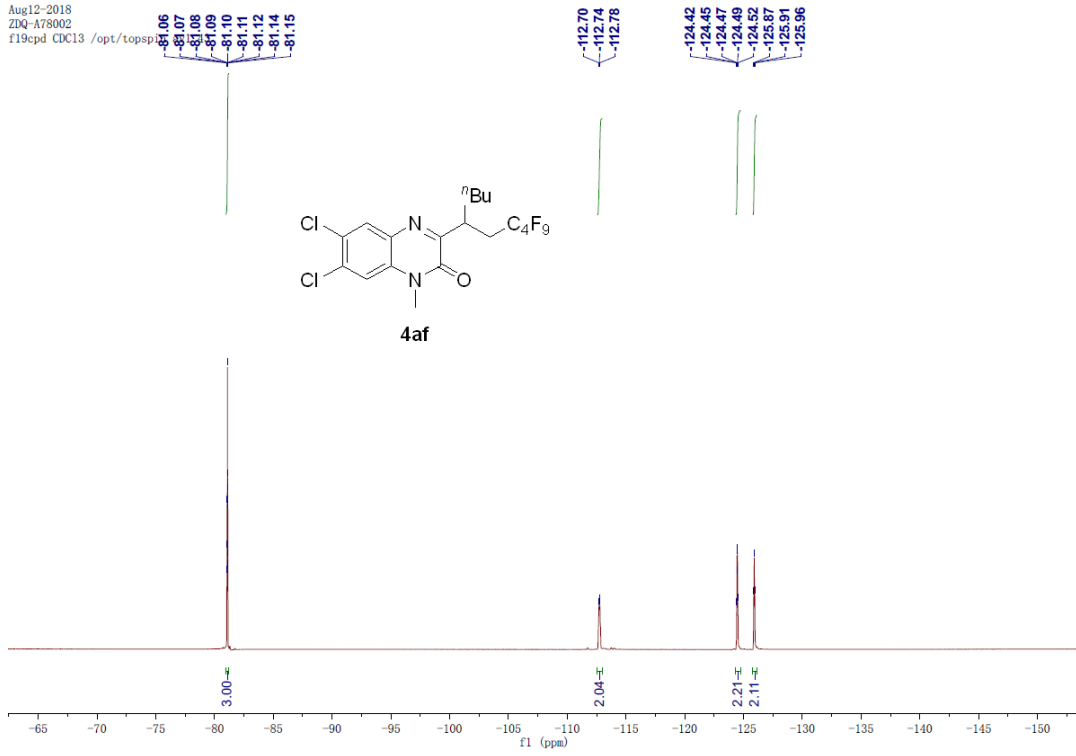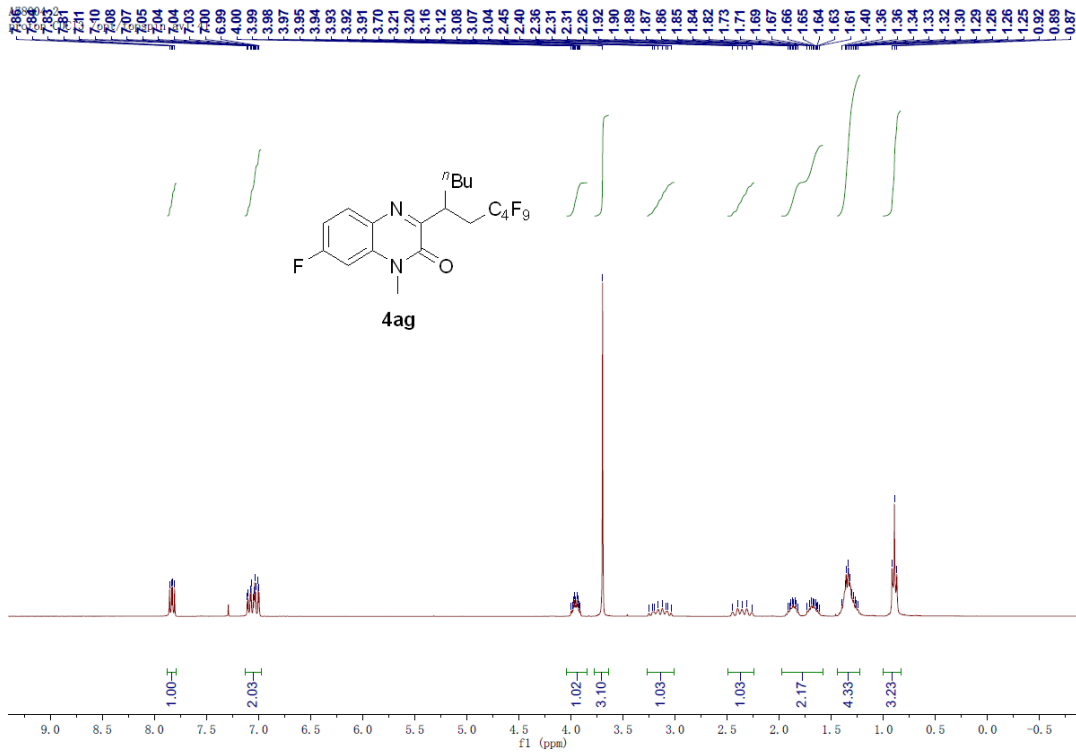



A78004-2  
carbon\_256

164.89  
161.58  
158.97  
156.92  
152.44

134.53  
131.83  
131.70  
129.21

111.47  
111.16

100.69  
100.32

34.44  
34.06  
32.80  
32.52  
32.25  
29.39  
29.06  
22.53

13.80

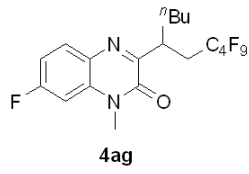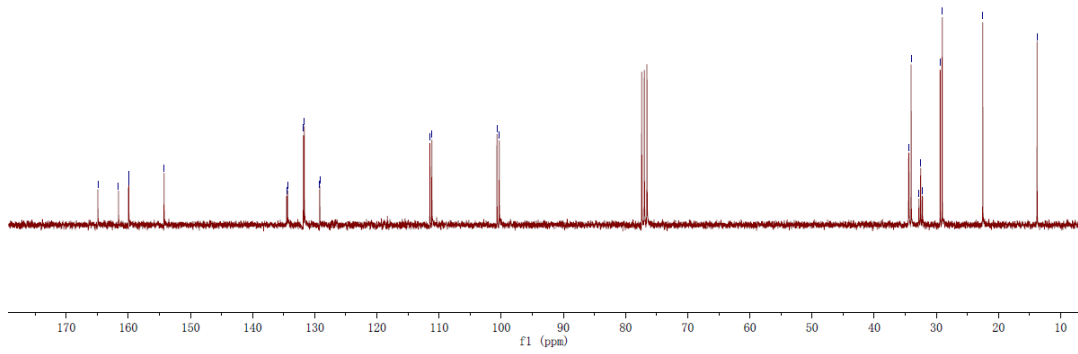

A78004-2  
f19cpd CDC13 /opt/top

81.89  
81.80  
81.51  
81.12  
81.13  
81.15  
81.16  
81.17  
81.18

107.74  
111.82  
112.74  
112.78  
112.83  
112.94  
112.98  
113.03  
113.94

124.49  
124.52  
124.53  
124.55  
124.59  
125.92  
126.00

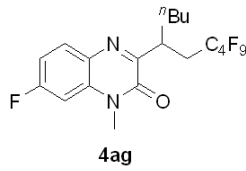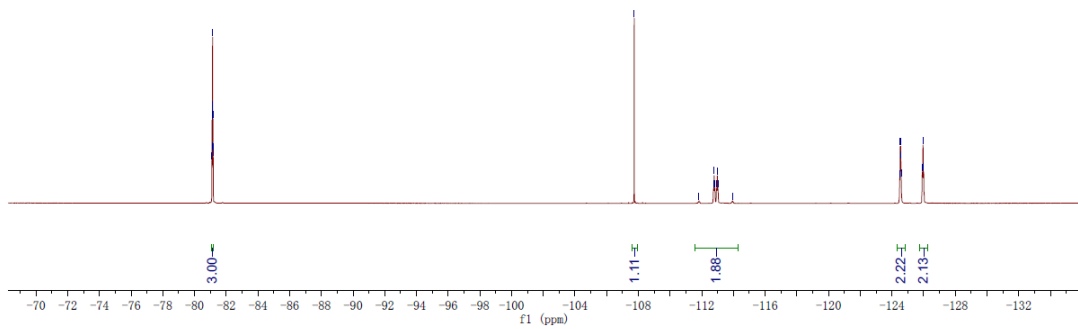

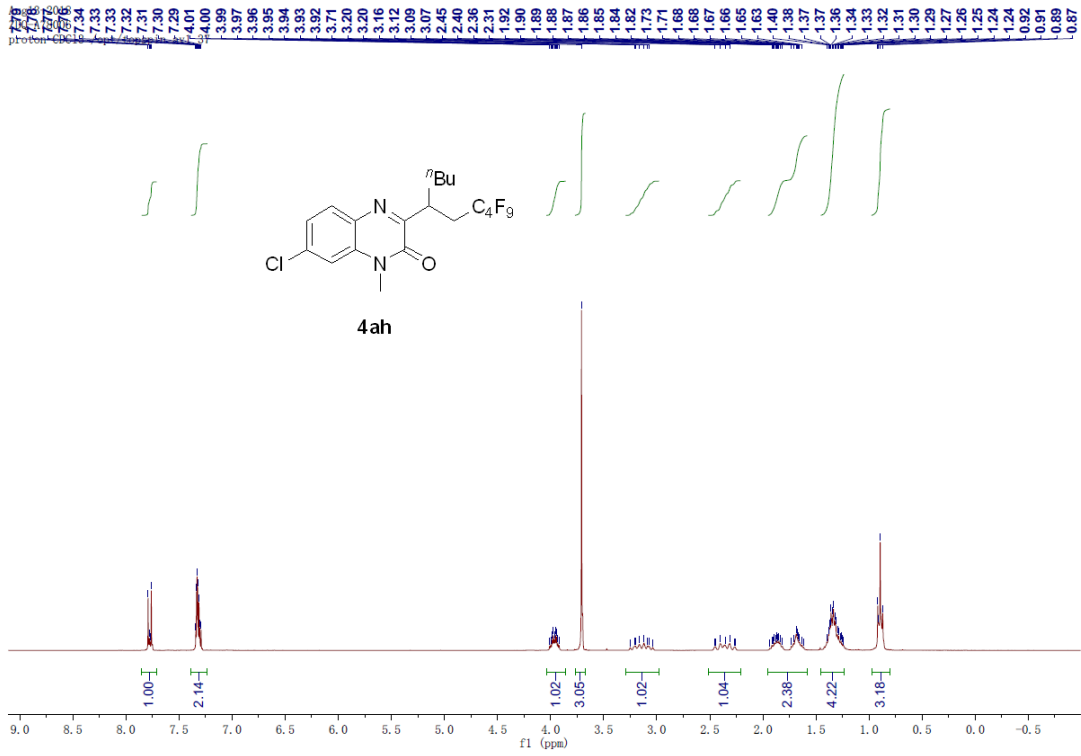

Aug13-2018  
 ZHQ-A78006  
 carbon CDC13 /opt/topspin

161.31  
 154.12

135.89  
 133.81  
 130.95

123.95

113.67

34.55  
 34.06  
 32.83  
 32.56  
 32.28  
 29.30  
 29.06  
 22.53

13.80

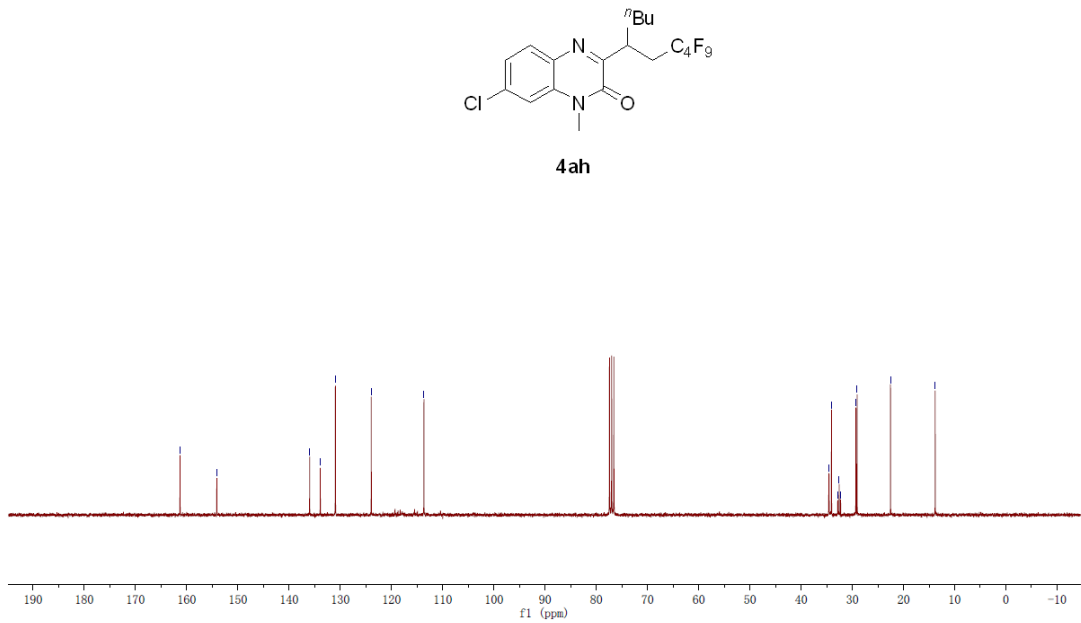

Aug13-2018  
 ZDQ-A78006  
 f19cpd CDC13 /opt/topspin av1 37

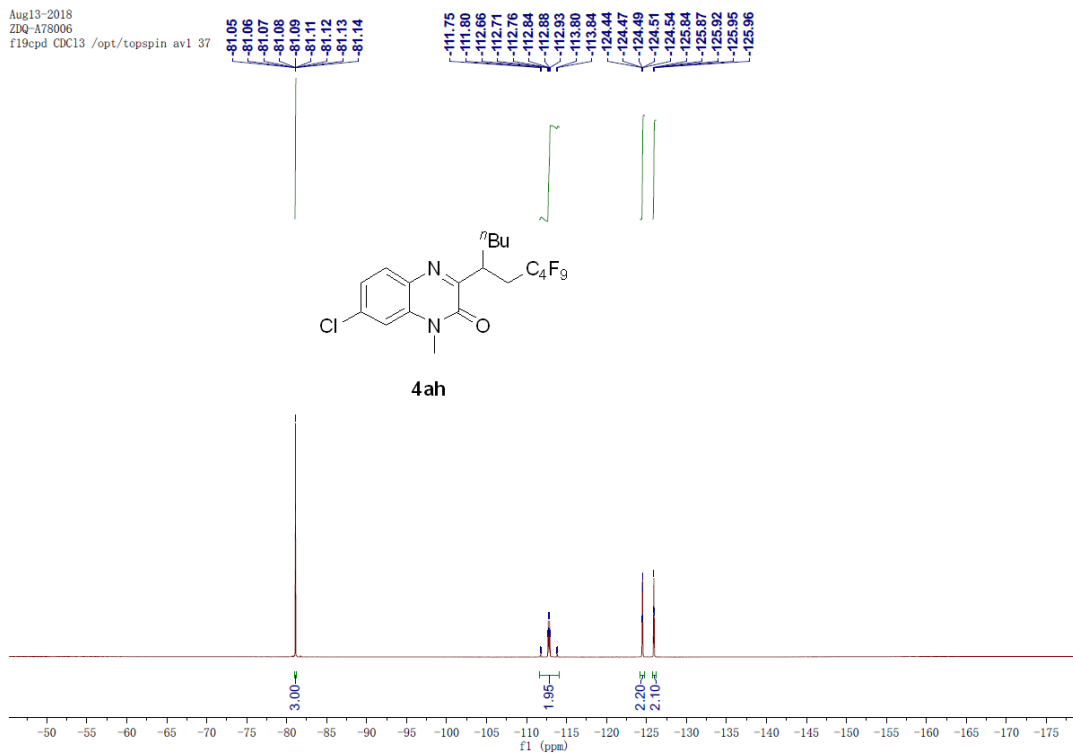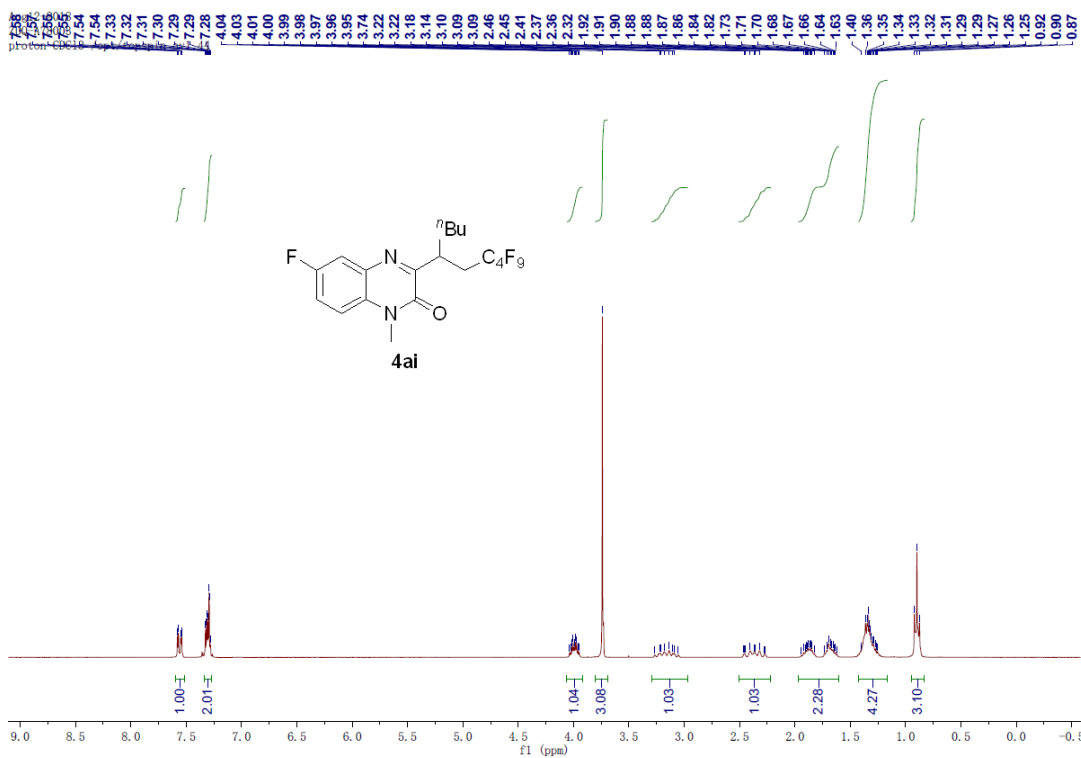

Aug12-2018  
 ZDQ-A78003  
 carbon CDC13 /opt/

162.81  
 160.35  
 157.12  
 154.03  
 /opt/av1 44

133.10  
 132.95  
 129.70  
 117.82  
 117.50  
 115.48  
 113.16  
 114.69  
 114.58

34.62  
 34.07  
 32.55  
 29.41  
 23.05  
 22.52  
 13.78

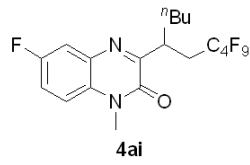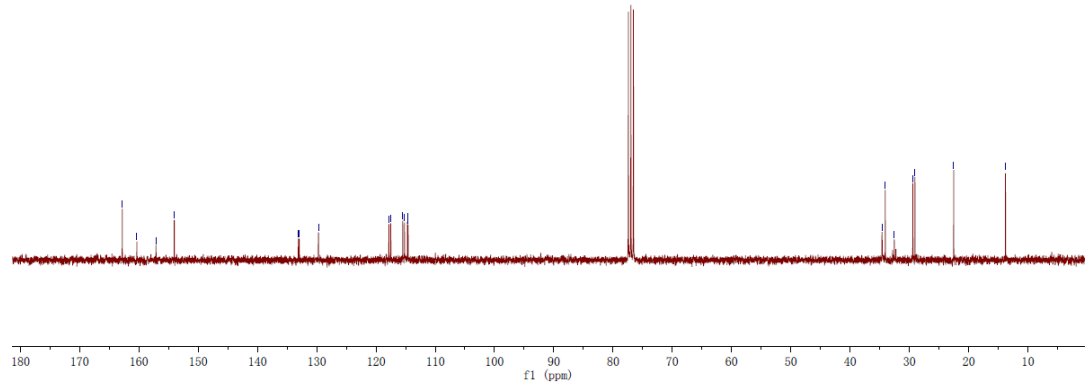

Aug12-2018  
 ZDQ-A78003  
 f19cpd CDC13 /opt/topspin av1 44

81.06  
 81.07  
 81.09  
 81.10  
 81.11  
 81.12  
 81.13  
 81.14  
 81.15

112.64  
 112.68  
 112.73  
 112.80  
 112.85  
 112.89  
 119.18  
 124.44  
 124.47  
 124.49  
 124.51  
 125.84  
 125.87  
 125.90  
 125.91  
 125.95

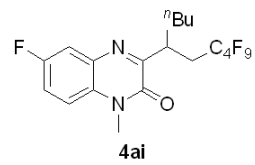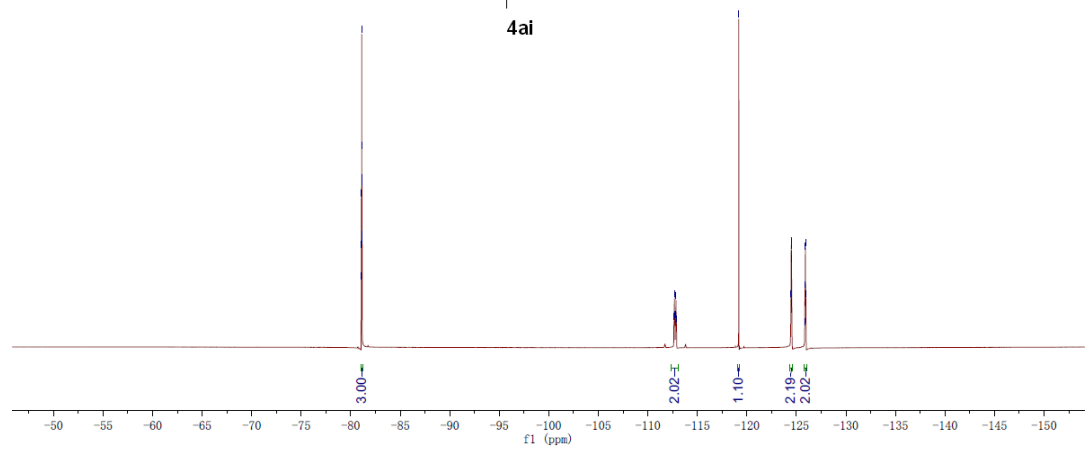

Aug13-2018  
ZDQ-A78005  
proton CDC13 /opt/topspin av1 36

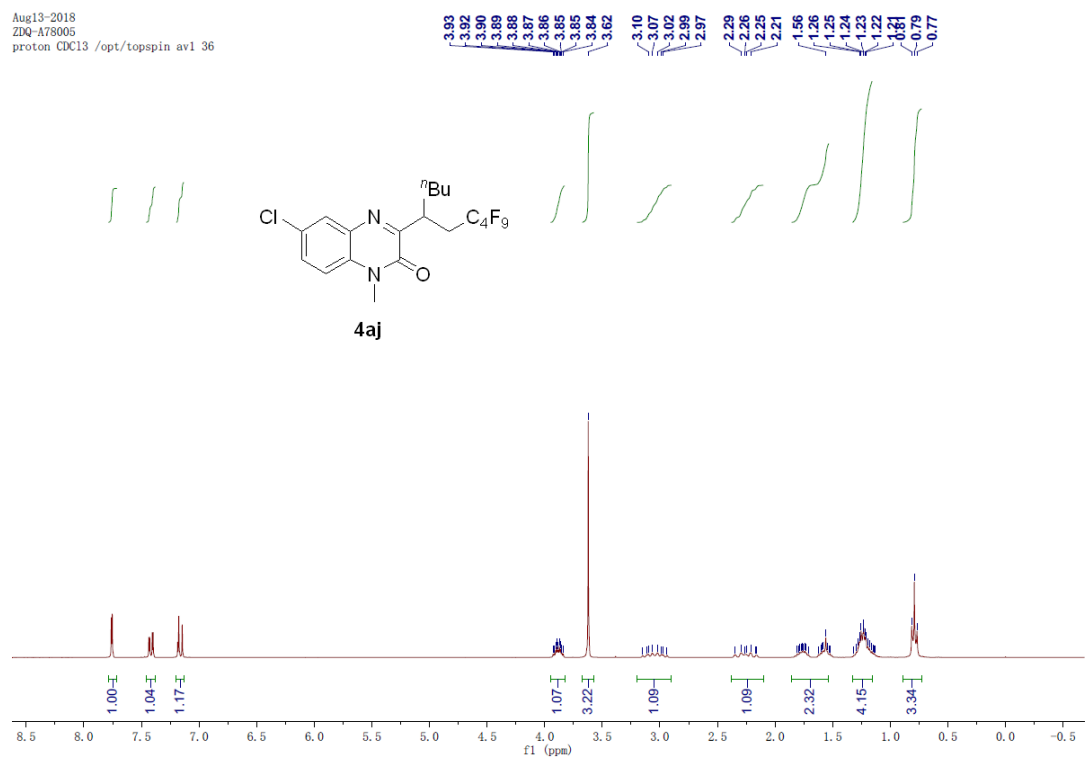

Aug13-2018  
ZDQ-A78005  
carbon CDC13 /opt/topspin av1 36

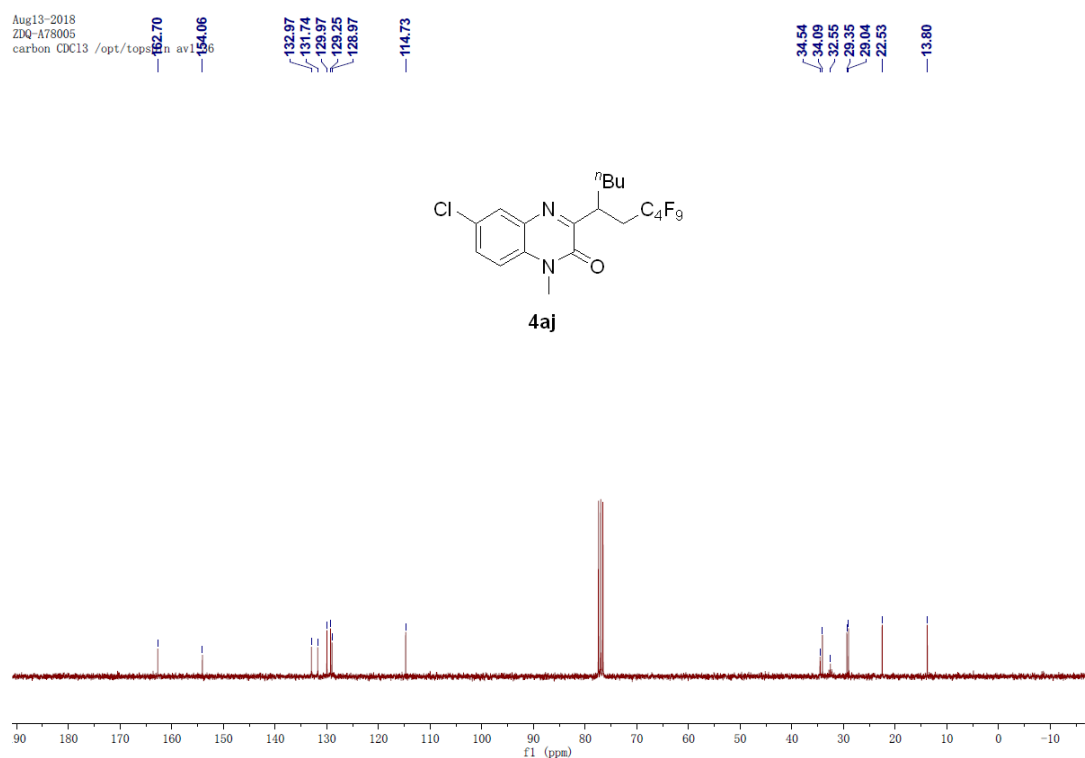

Aug13-2018  
ZDQ-A78005  
f19epd CDC13 /opt/topspin av1

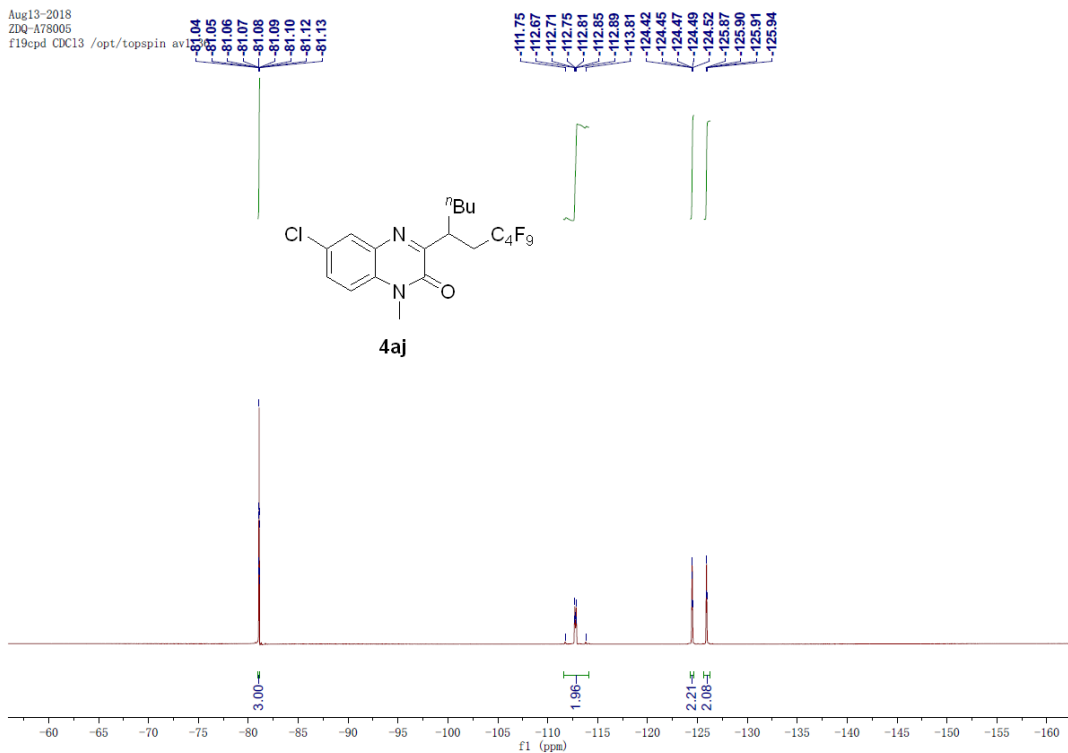

Aug13-2018  
ZDQ-A78007  
proton CDC13 /opt/topspin av1 38

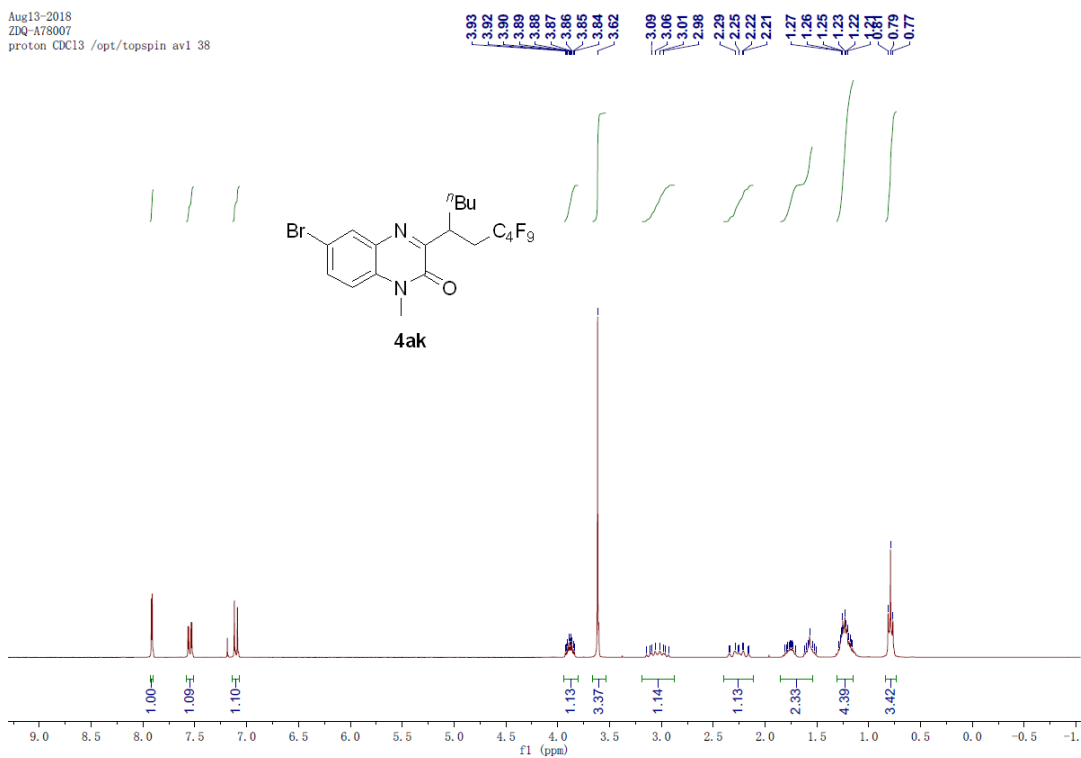

Aug13-2018  
ZDQ-A78007  
carbon CDC13 /opt/topspin

152.66

154.05

133.27

132.72

132.30

132.19

116.18

115.03

34.53

34.11

32.84

32.56

32.29

29.33

22.53

13.80

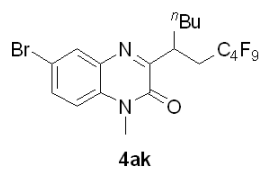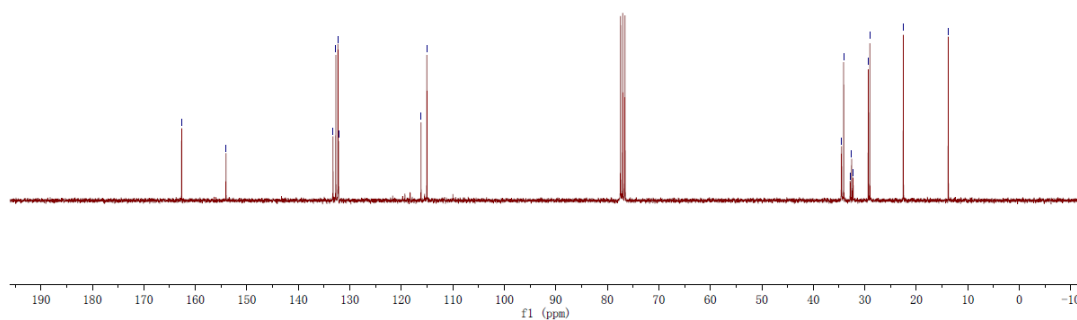

Aug13-2018  
ZDQ-A78007  
f19cpd CDC13 /opt/topspin av1 38

81.03

81.04

81.05

81.07

81.08

81.09

81.10

81.11

81.12

111.76

112.67

112.68

112.71

112.76

112.80

112.85

112.88

113.80

124.41

124.44

124.46

124.51

125.86

125.91

125.94

125.95

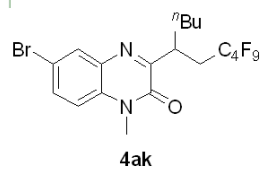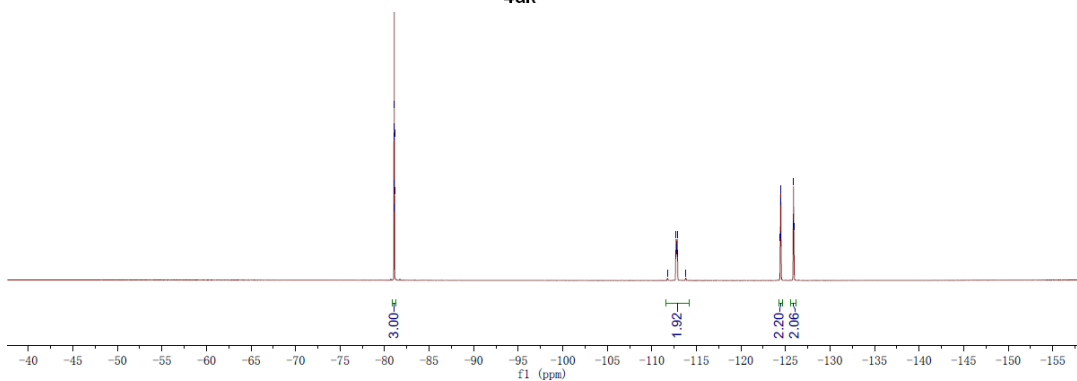

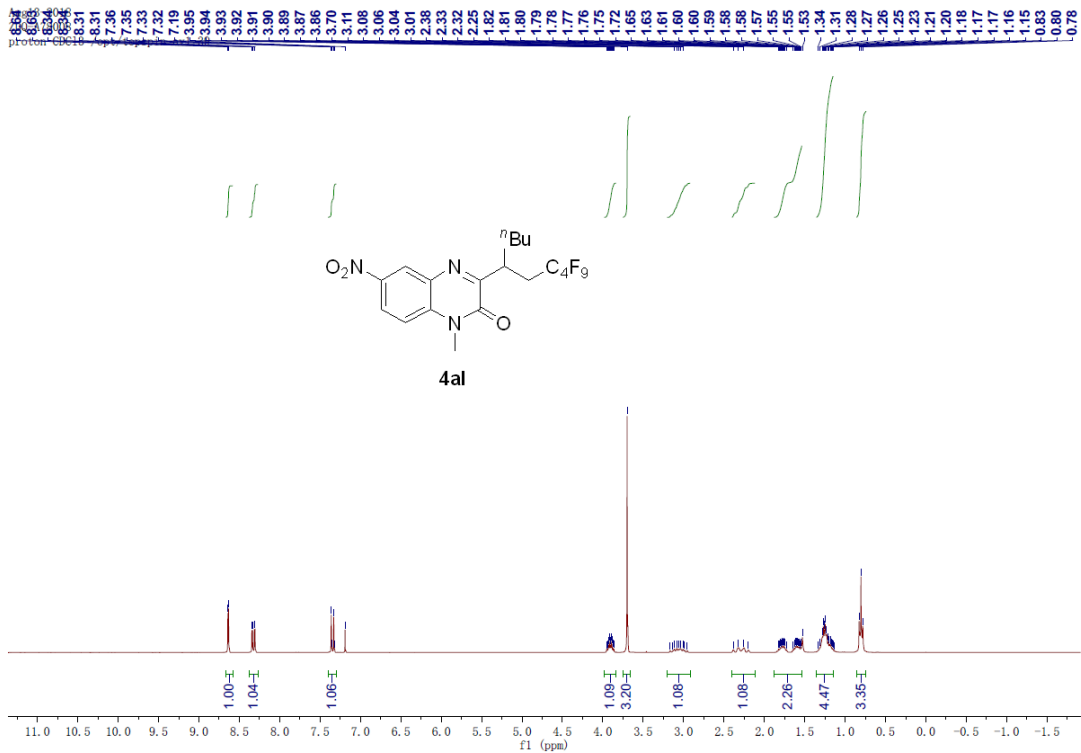

Aug13-2018  
 ZIQ-A78008  
 carbon CDC13 /opt/top/in av1

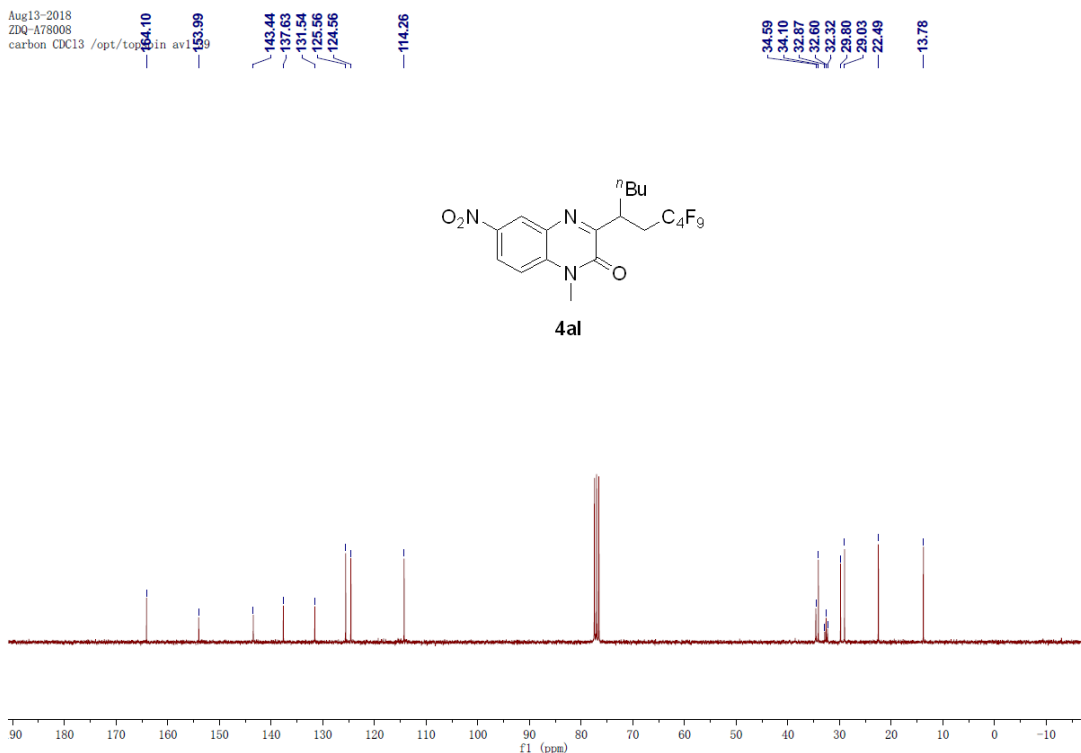



Aug13-2018  
ZDQ-A78008  
f19epd CDC13 /opt/topspin av1

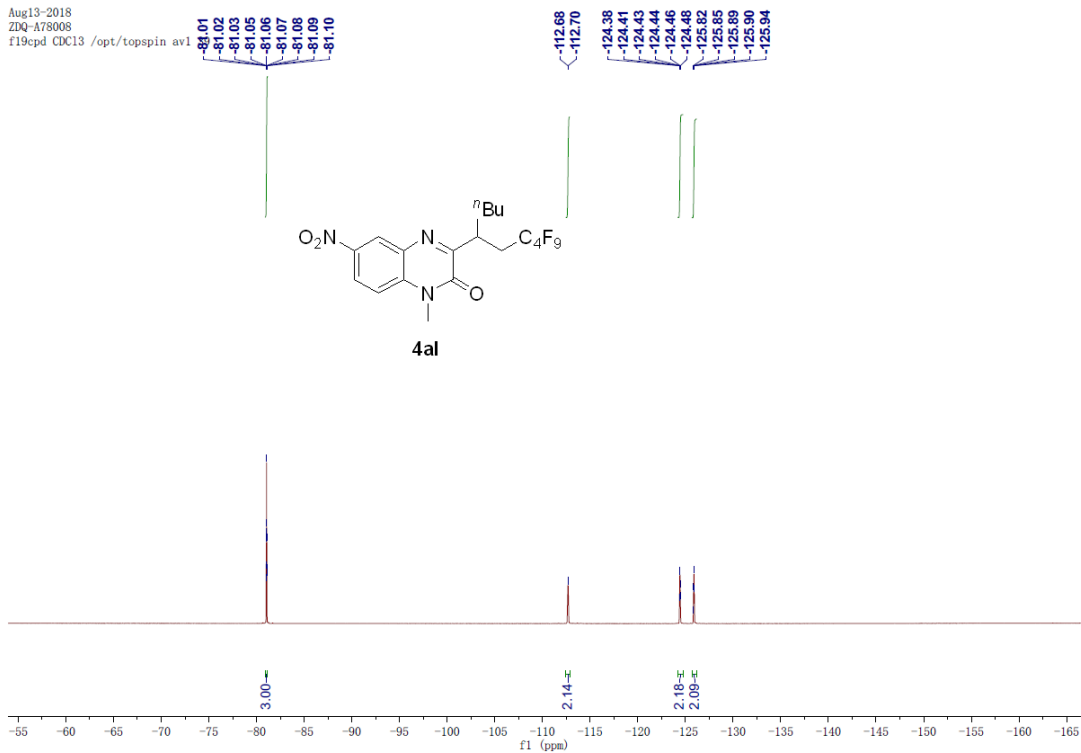

Aug13-2018  
ZDQ-A78008  
proton CDC13 /opt/topspin av1

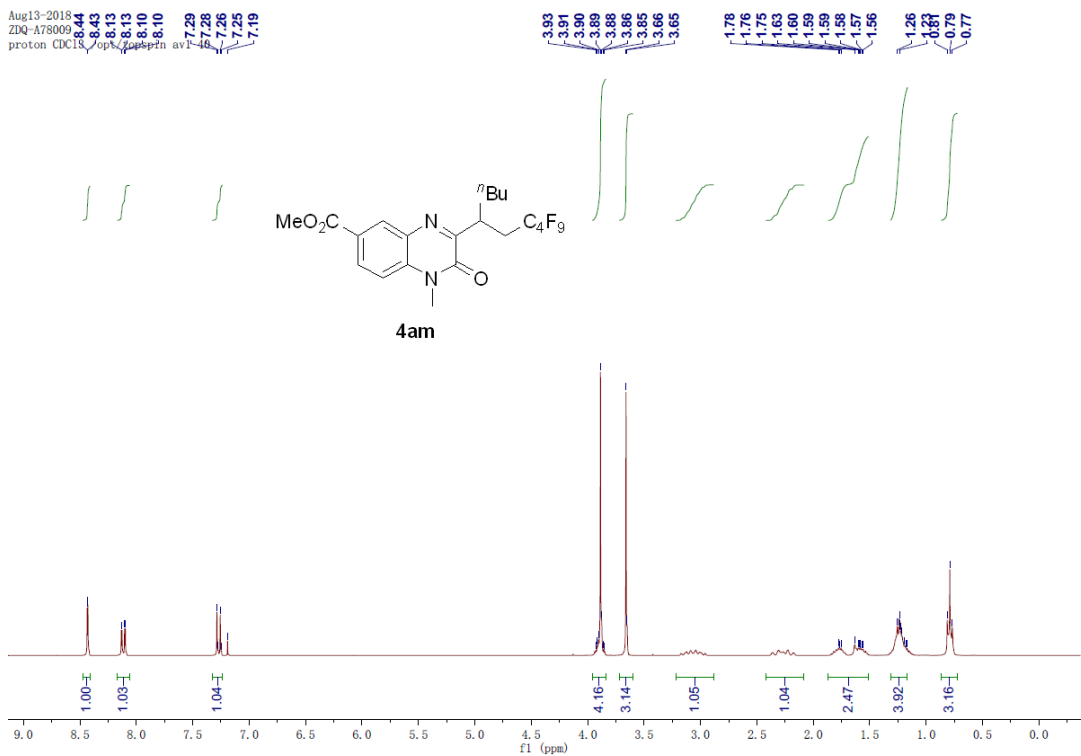

Aug13-2018  
ZDQ-A78009  
carbon CDC13 /opt/topspi

166.05  
162.22  
154.30

136.31  
131.79  
131.67  
130.75  
125.59

113.67

52.27

34.43  
34.10  
32.84  
32.56  
32.29  
29.44  
29.01  
22.52

13.79

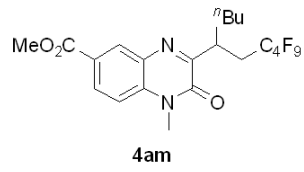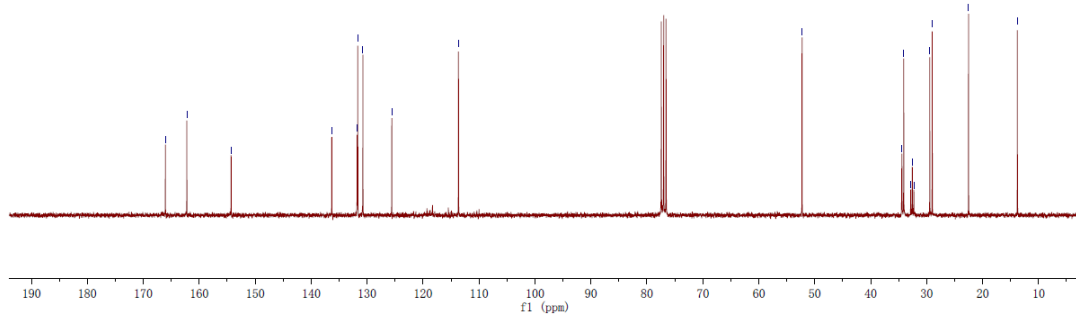

Aug13-2018  
ZDQ-A78009  
f19cpd CDC13 /opt/topspin av1 40

81.05  
81.06  
81.07  
81.08  
81.09  
81.11  
81.12  
81.13  
81.14

111.77  
112.69  
112.73  
112.77  
112.83  
112.87  
112.91  
113.83  
124.41  
124.44  
124.46  
124.47  
124.51  
125.88  
125.92  
125.96

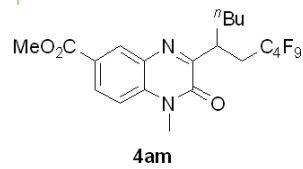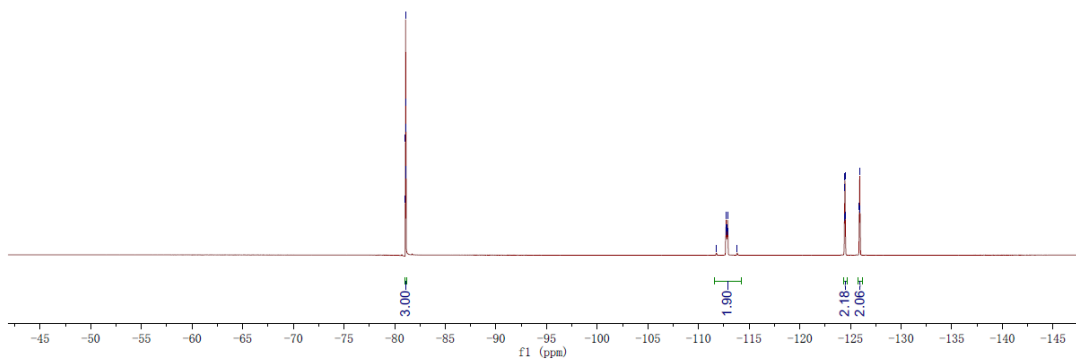

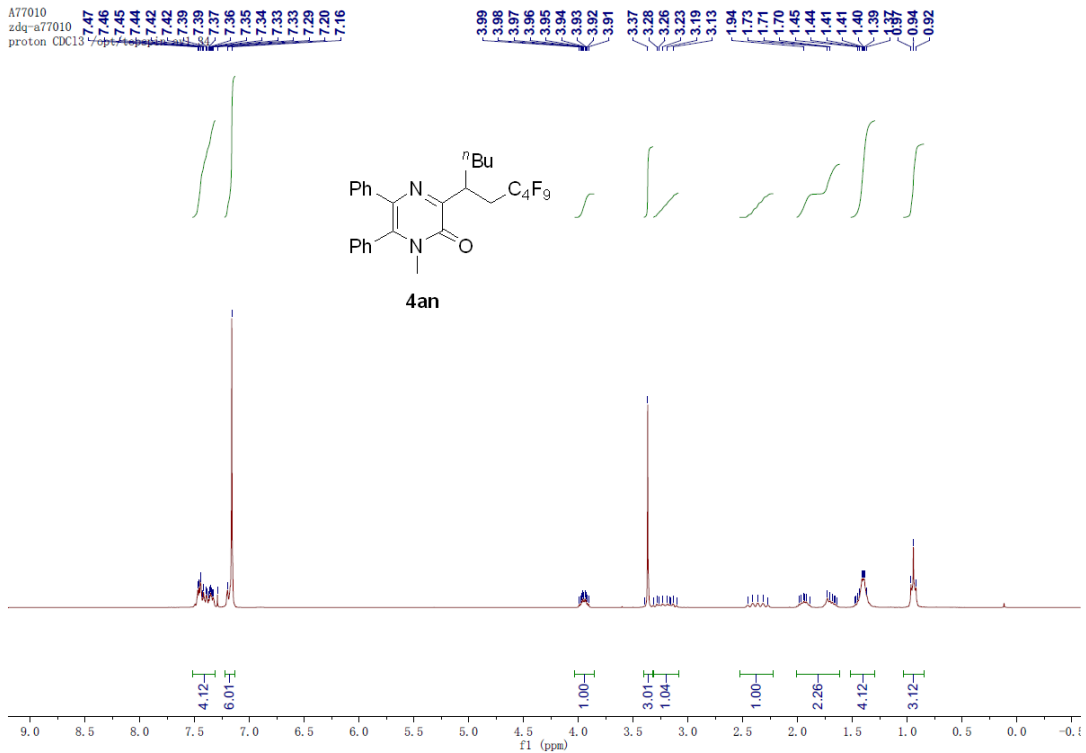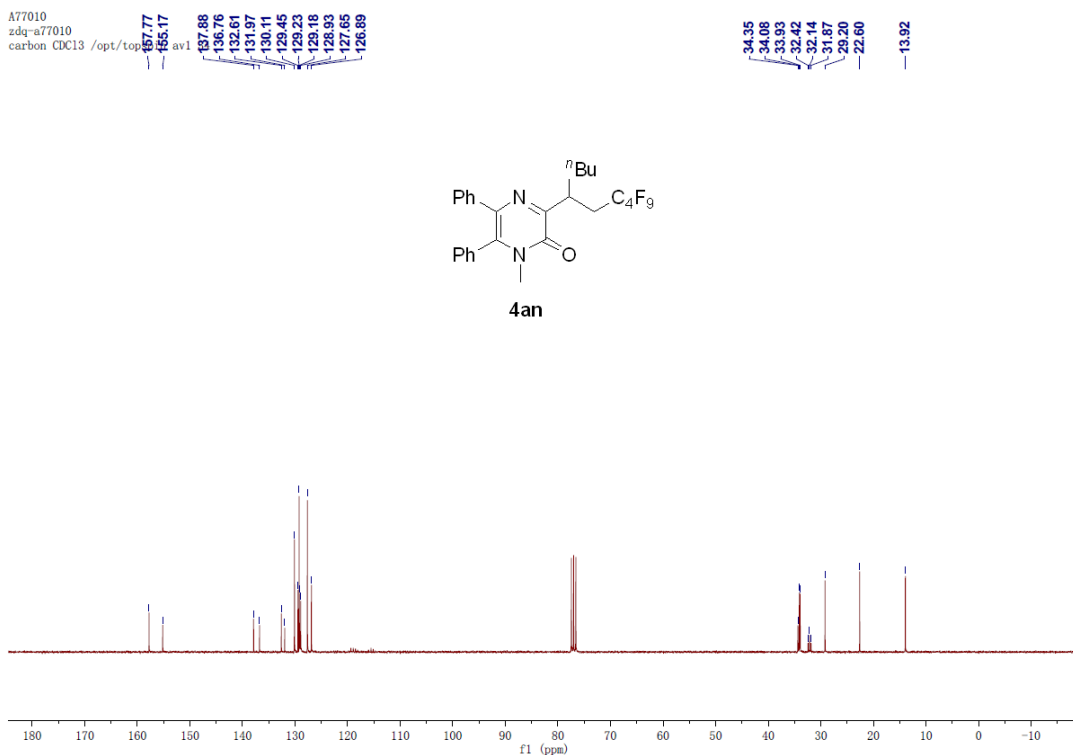

A77010  
zdq-a77010  
f19epd CDC13 /opt/topspin av1 34

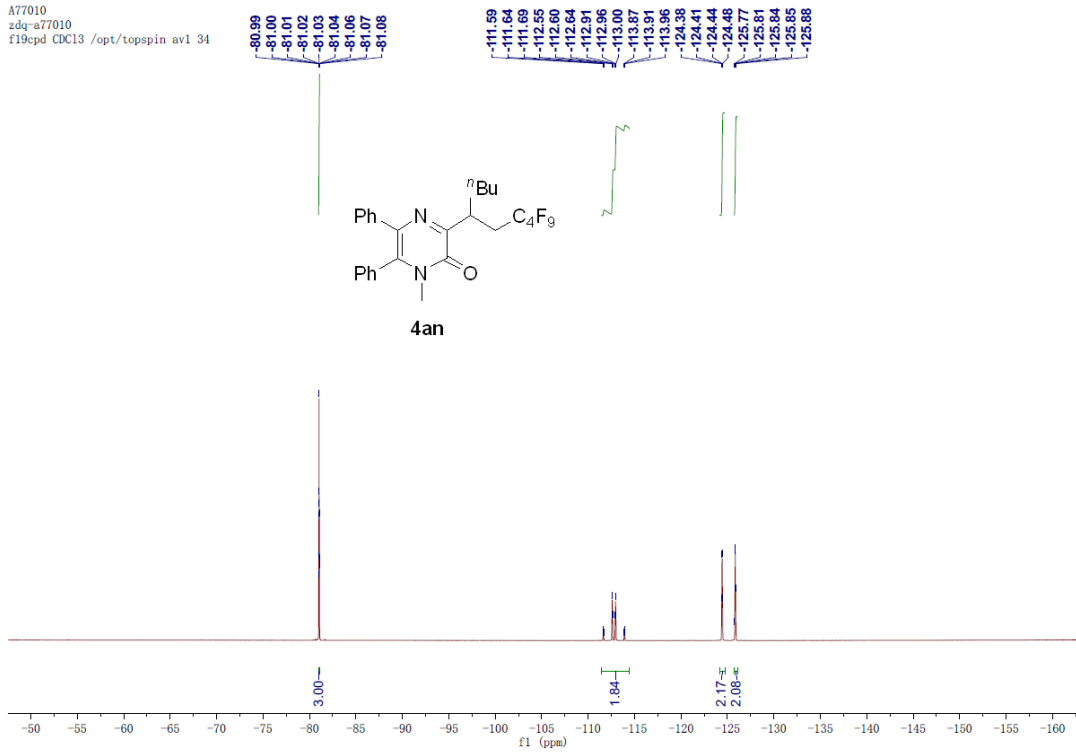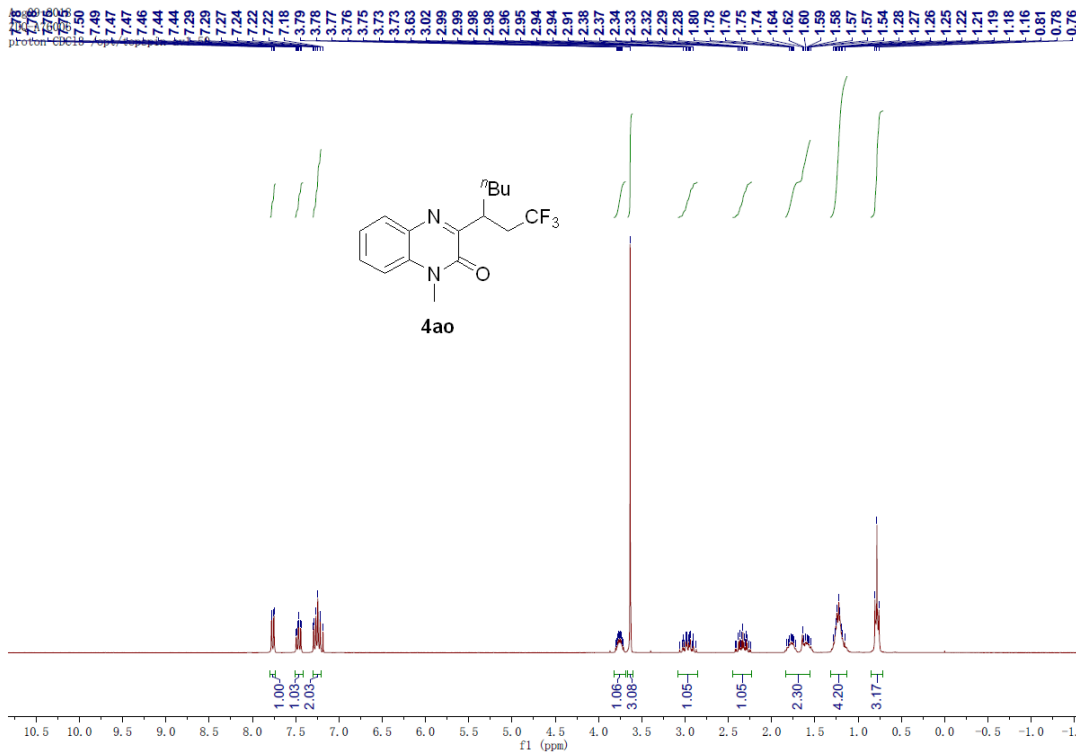

Aug09-2018  
ZDQ-A76006  
carbon CDCl<sub>3</sub> /opt/topspin av1 50

164.48

154.48

133.05

132.52

129.99

128.82

125.15

123.56

113.57

36.45

36.08

36.05

36.02

35.72

35.35

33.51

29.15

29.04

22.57

13.84

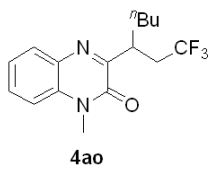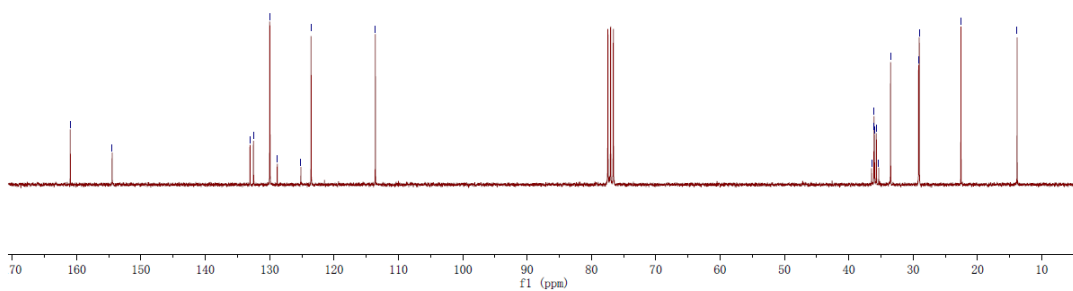

Aug09-2018  
ZDQ-A76006  
f19cpd CDC13 /opt/topspin av1 50

64.39

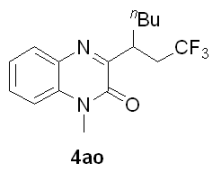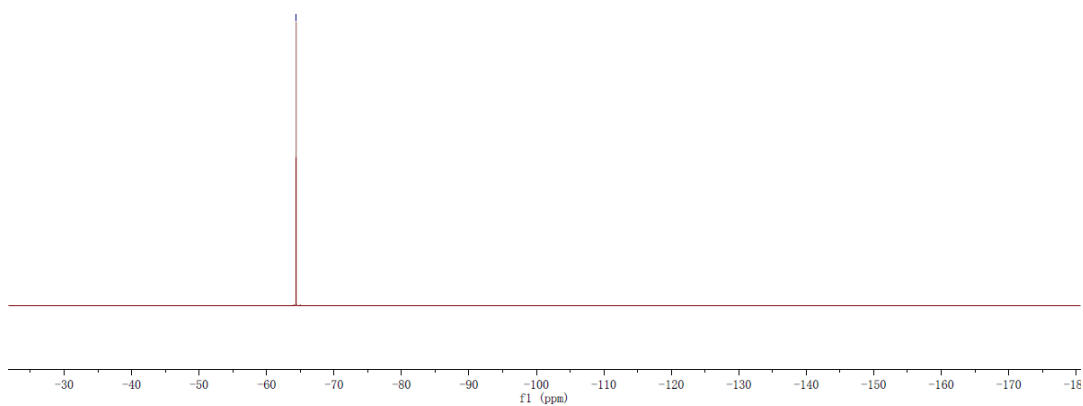

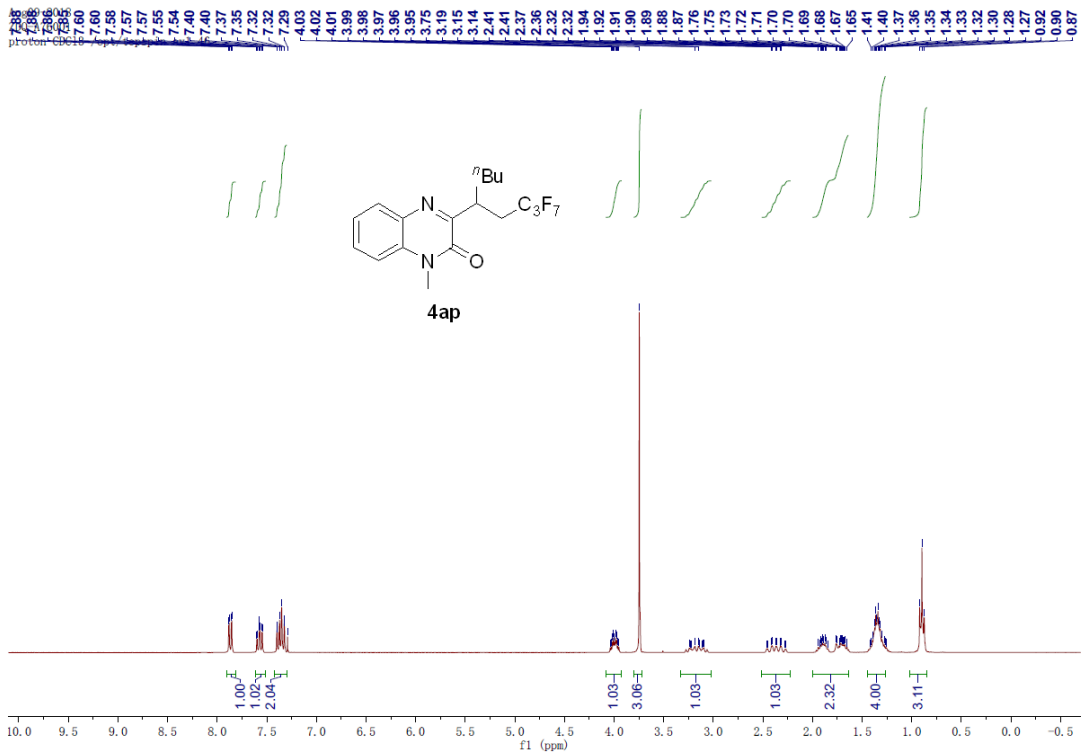

Aug09-2018  
 ZIR-A76001  
 carbon CDC13 /opt/topspin av1 46

161.18  
154.41

133.05  
132.49  
129.98  
129.92  
123.56  
113.57

34.54  
34.09  
33.73  
33.45  
33.18  
28.16  
28.08  
23.56  
13.82

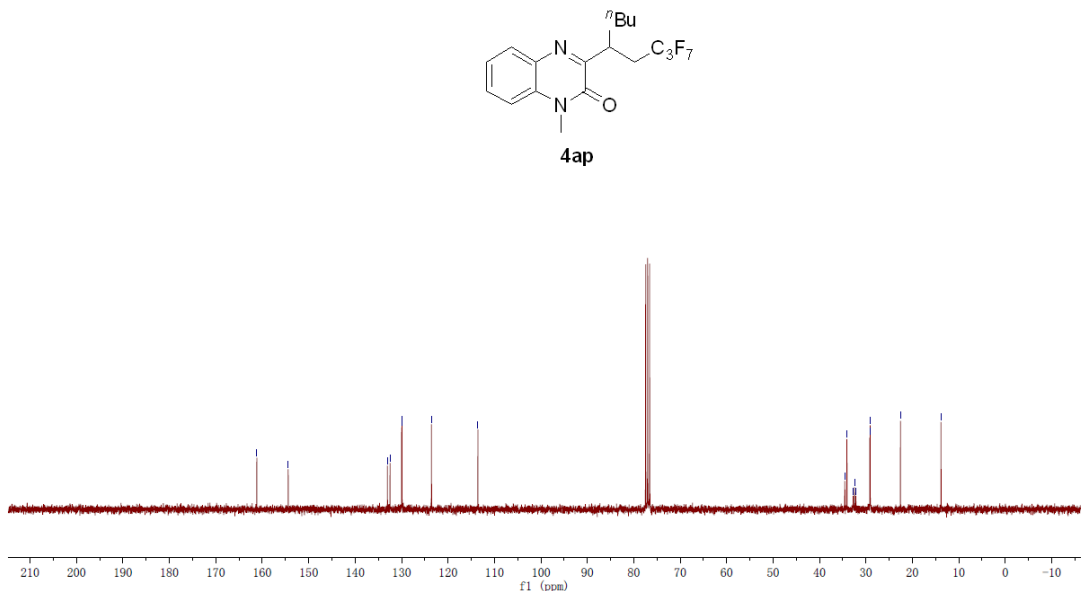

Aug09-2018  
ZDQ-A76001  
f19cpd CDC13 /opt/topspin av1 46

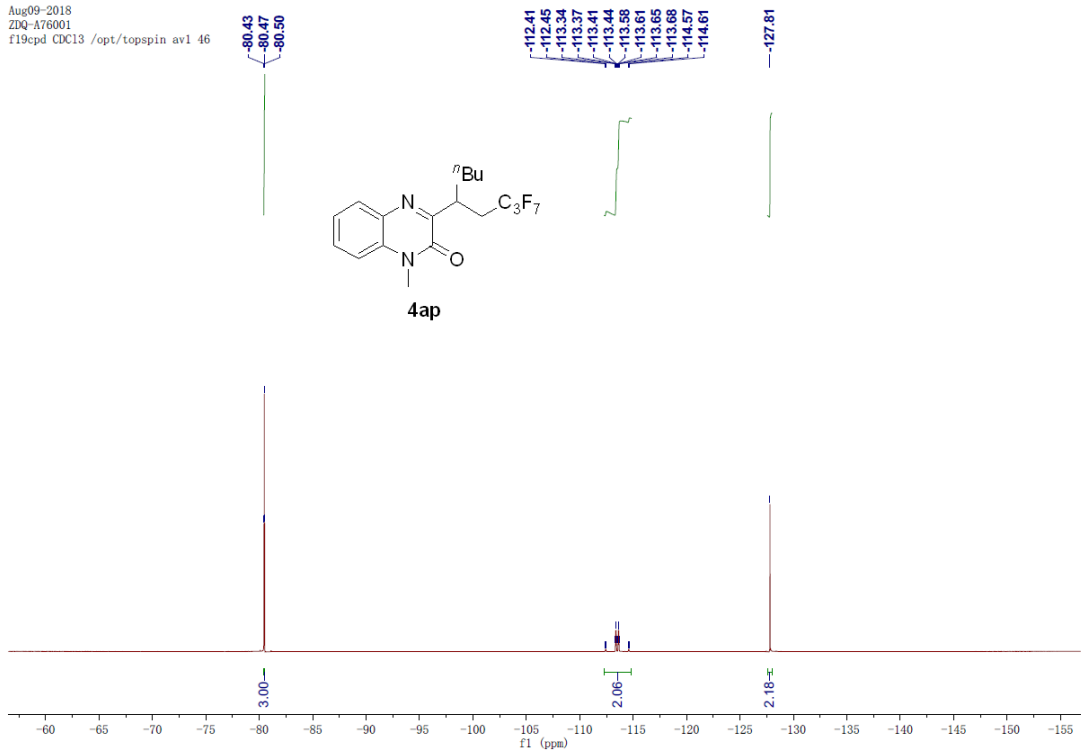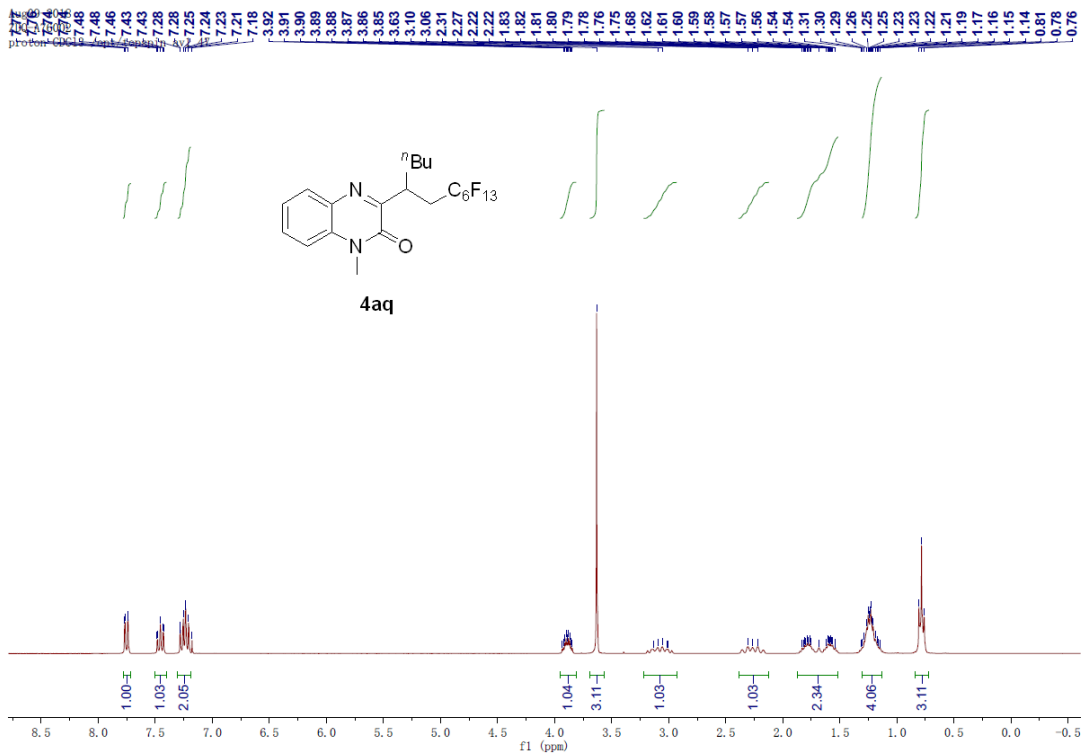

Aug09-2018  
ZDQ-A76002  
carbon CDC13 /opt/topspin av1 47

151.18  
154.41

133.06  
132.50  
129.94  
123.53

113.54

34.69  
34.10  
32.97  
32.69  
32.42  
29.12  
29.08  
22.54  
13.77

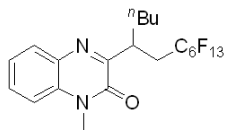

4aq

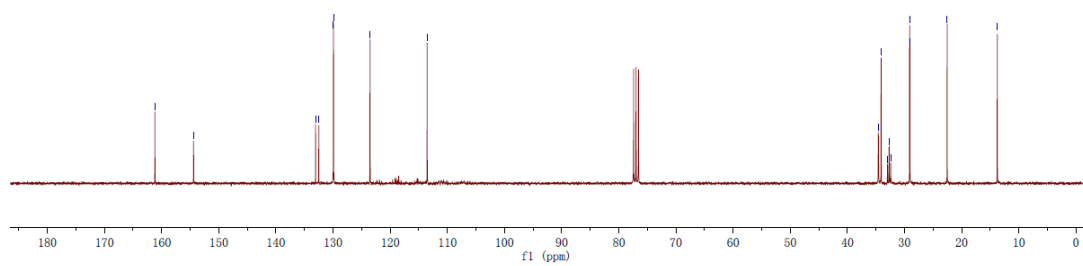

Aug09-2018  
ZDQ-A76002  
f19cpd CDC13 /opt/topspin av1 47

80.87  
80.88  
80.89  
80.91  
80.92  
80.94  
80.95  
80.96

111.53  
112.44  
112.49  
112.54  
112.64  
112.69  
112.74  
113.65  
121.81  
122.88  
123.54  
123.59  
123.60  
126.14  
126.17  
126.19  
126.22  
126.24

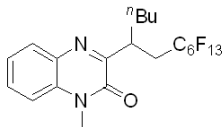

4aq

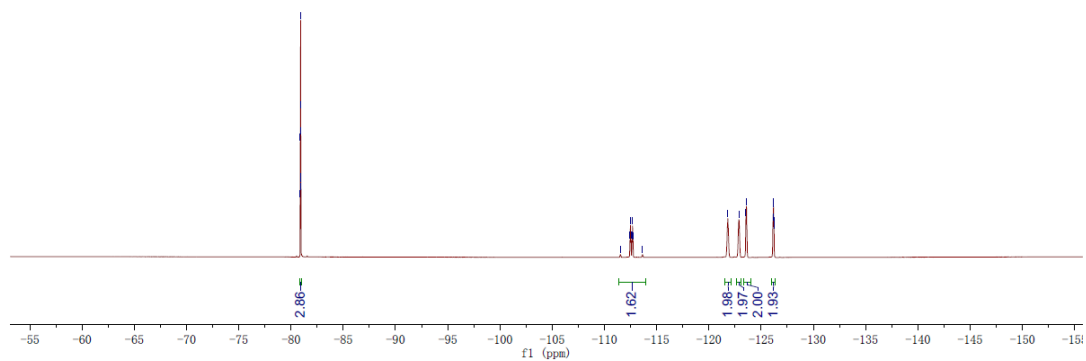



Aug09-2018  
ZDQ-A76003  
proton CDC13

7.77  
7.77  
7.75  
7.74  
7.49  
7.47  
7.46  
7.44  
7.29  
7.26  
7.24  
7.24  
7.22  
7.21  
7.18

3.93  
3.92  
3.91  
3.90  
3.89  
3.88  
3.87  
3.86  
3.85  
3.64  
3.10  
3.05

2.31  
2.27  
2.22  
1.59  
1.26  
1.26  
1.25  
1.22  
0.87  
0.79  
0.77

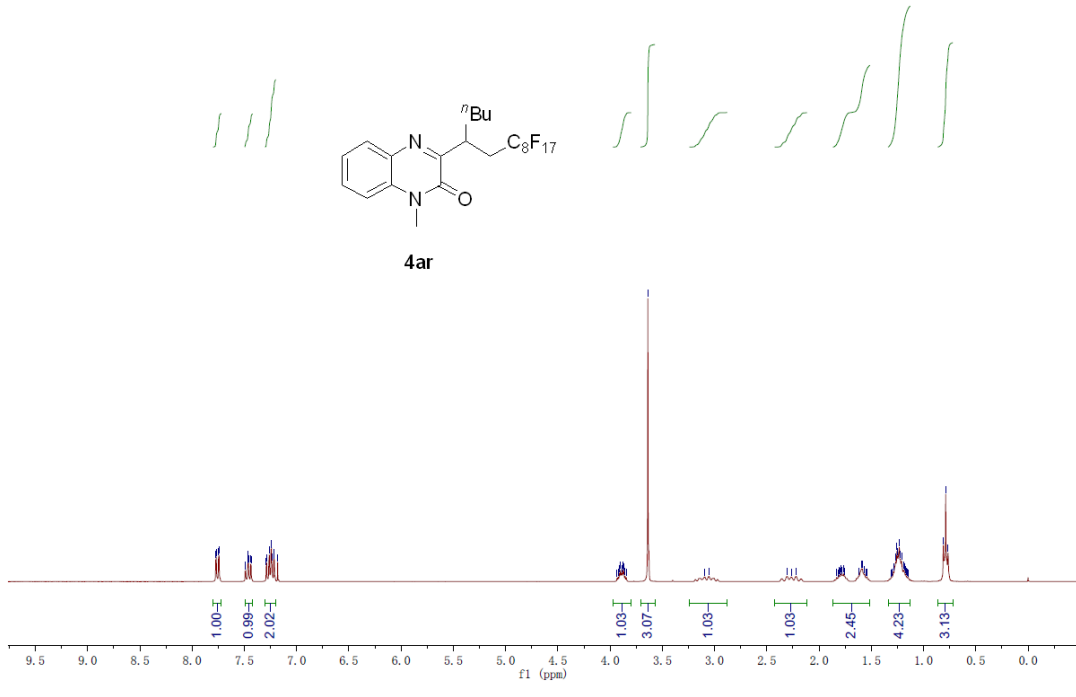

Aug09-2018  
ZDQ-A76003  
carbon CDC13 /opt/topspin a

161.19  
154.41  
133.06  
132.50  
129.95  
129.92  
123.54  
113.55

34.59  
34.10  
32.99  
32.71  
32.43  
29.13  
25.06  
22.35  
13.79

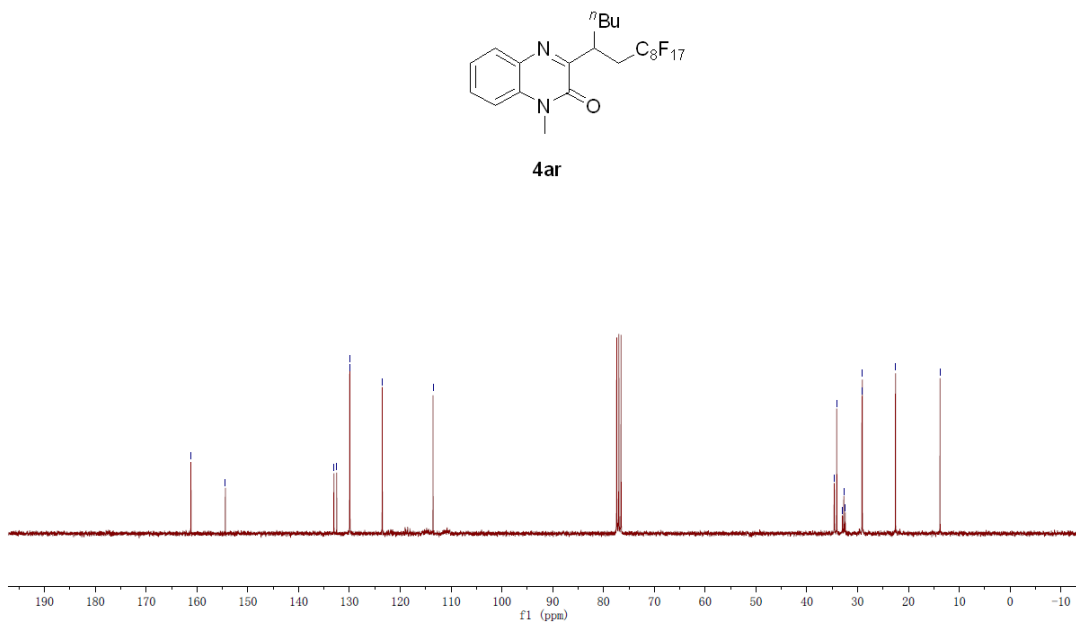

Aug09-2018  
ZDQ-A76003  
f19cpd CDC13 /opt/topspin av1 48

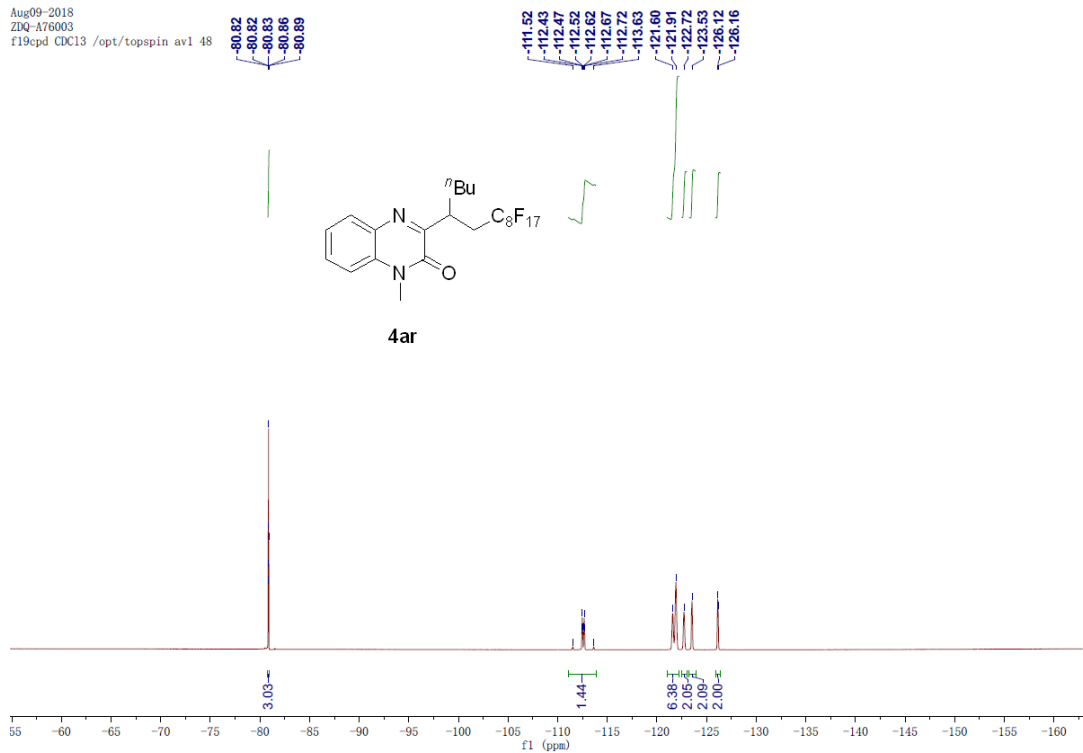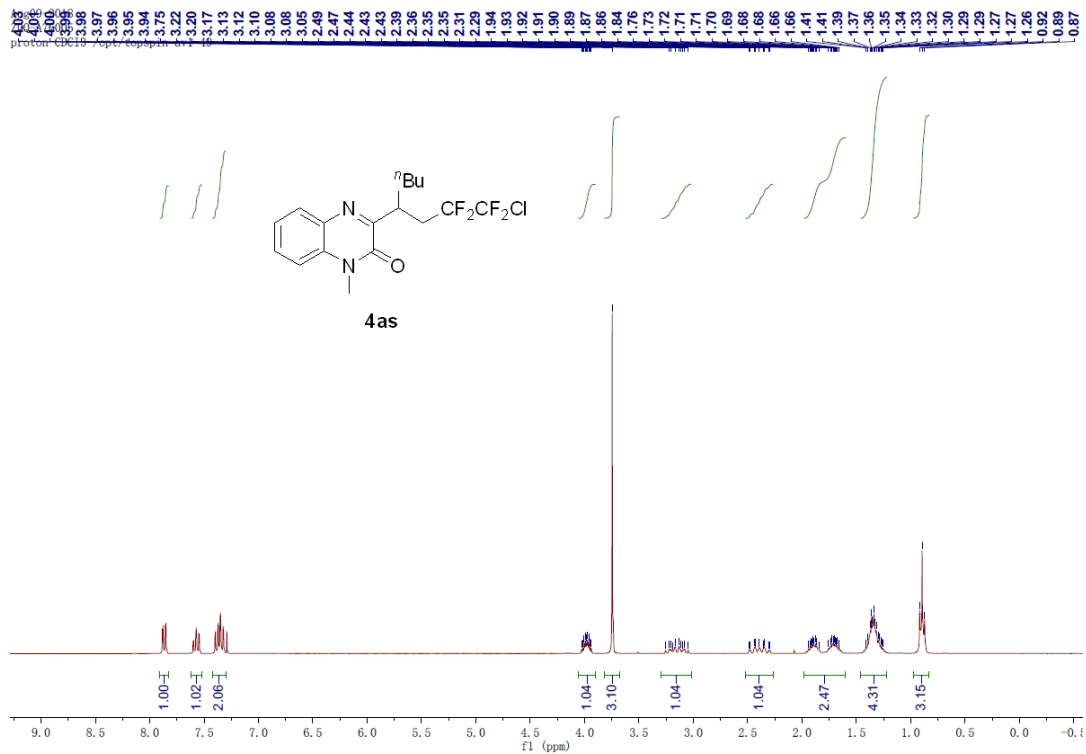

Aug09-2018  
ZDQ-A76005  
carbon CDC13 /opt/topspin av1 49

161.29

154.44

133.05

132.91

129.95

123.55

113.56

35.02

34.05

32.82

32.54

32.26

29.09

22.58

13.84

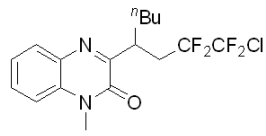

4as

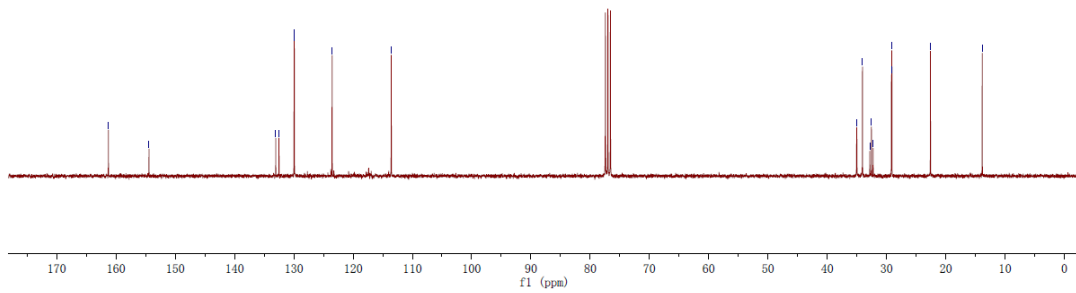

Aug09-2018  
ZDQ-A76005  
f19cpd CDC13 /opt/topspin av1 49

71.18

71.19

71.20

71.21

111.27

112.18

112.38

113.29

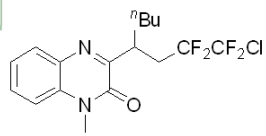

4as

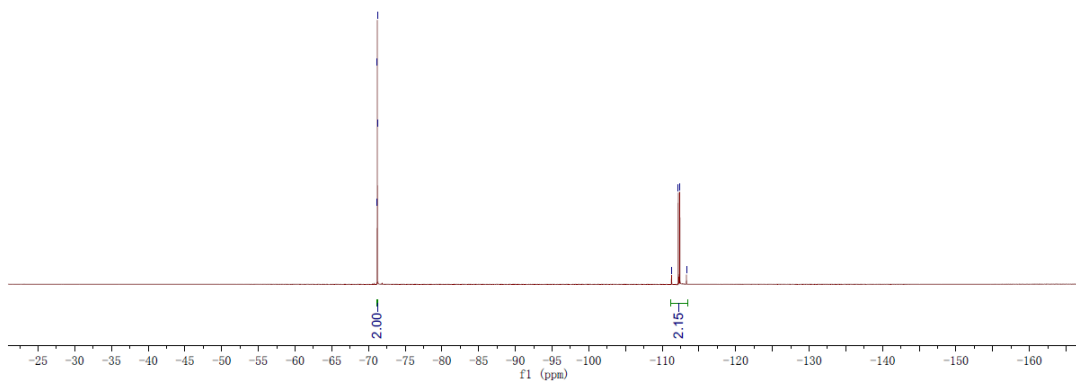

Aug13-2018  
 ZDQ-A75011  
 proton CDC13

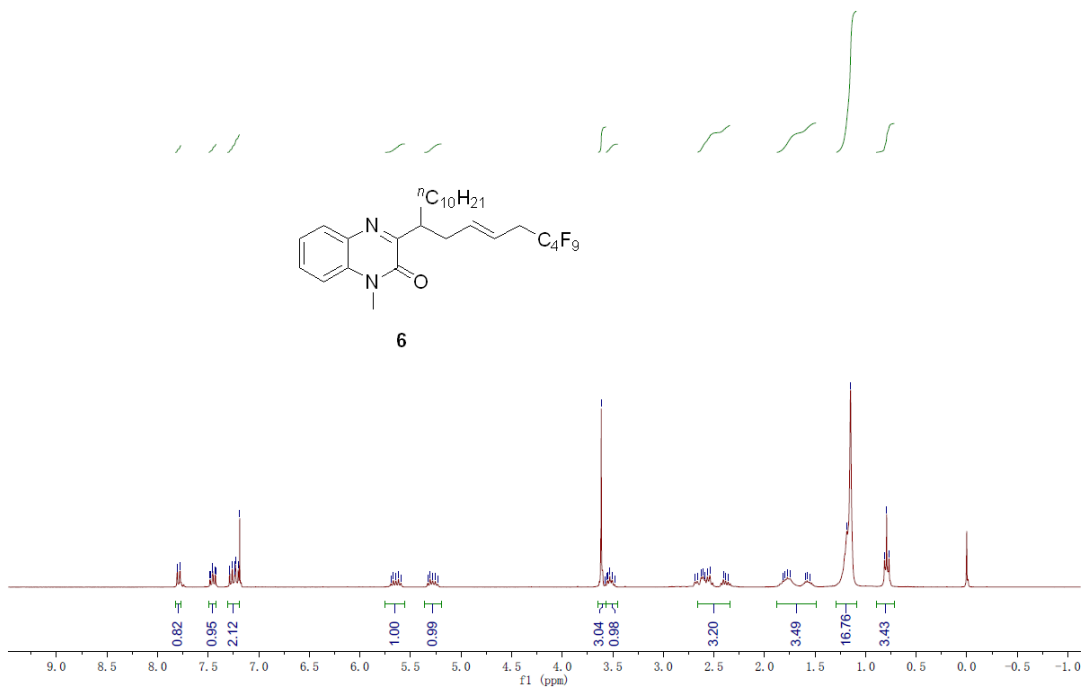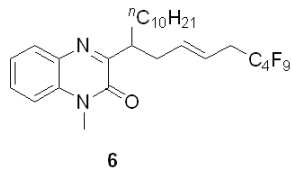

Aug13-2018  
 ZDQ-A75011  
 carbon CDC13

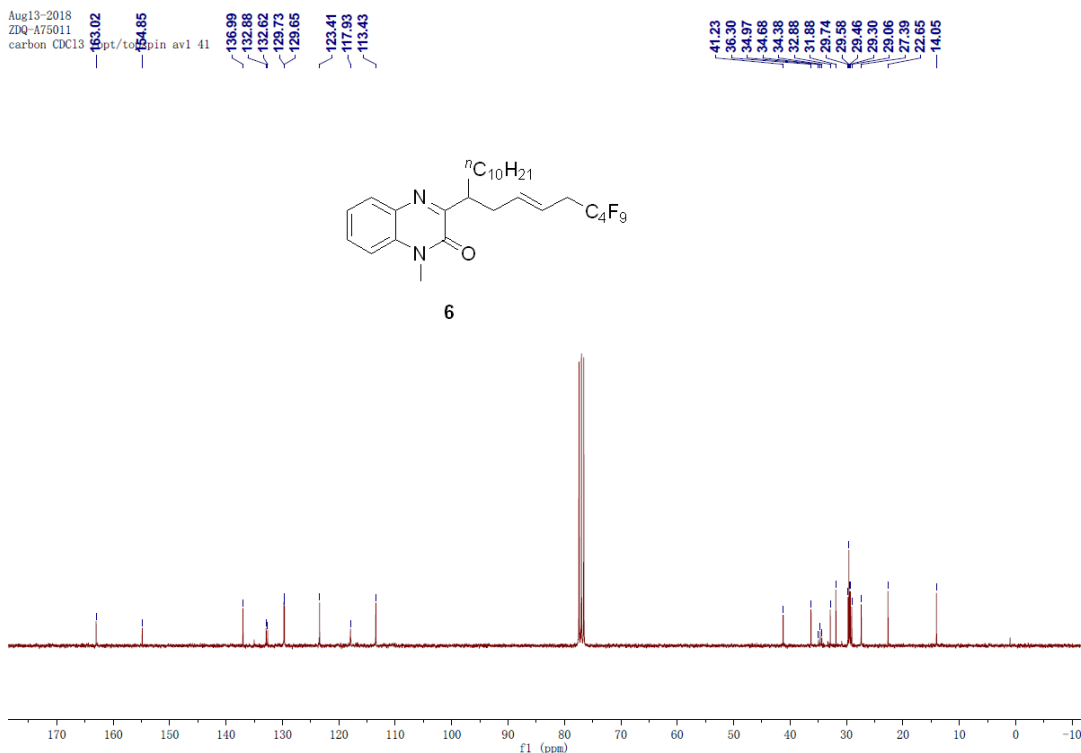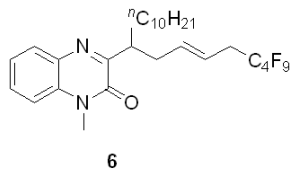

Aug13-2018  
ZDQ-A75011  
f19epd CDC13 /opt/topspin av1 41

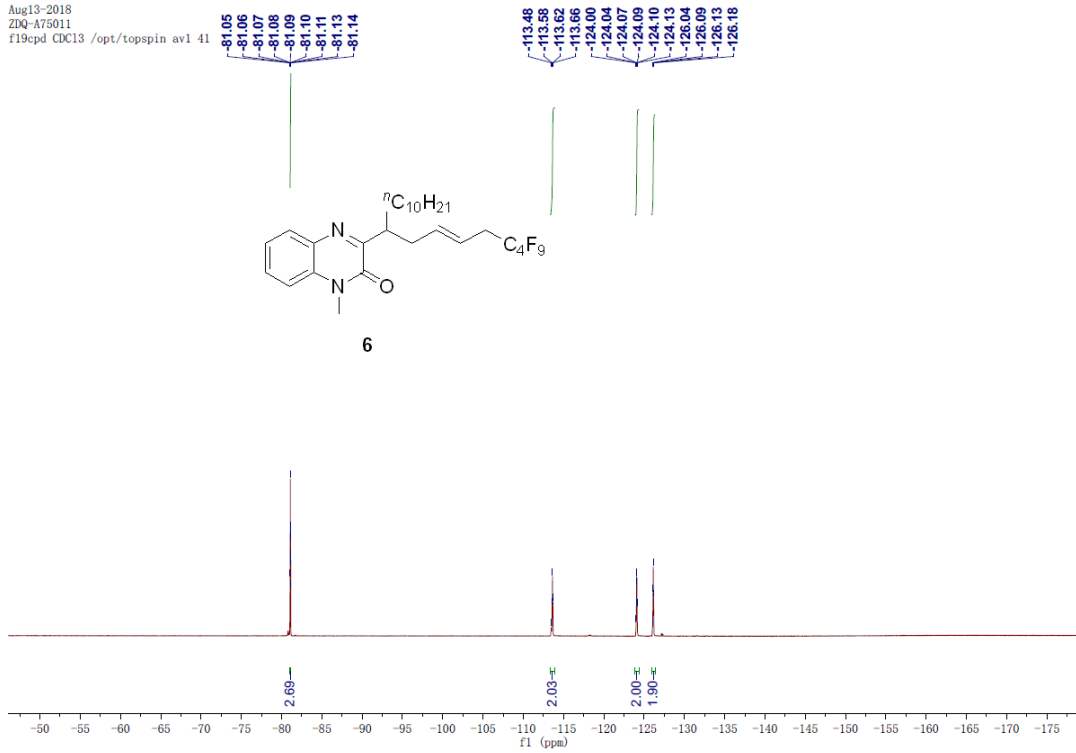

Aug12-2018  
ZDQ-A75012-2  
proton CDC13 /opt/topspin av1 41

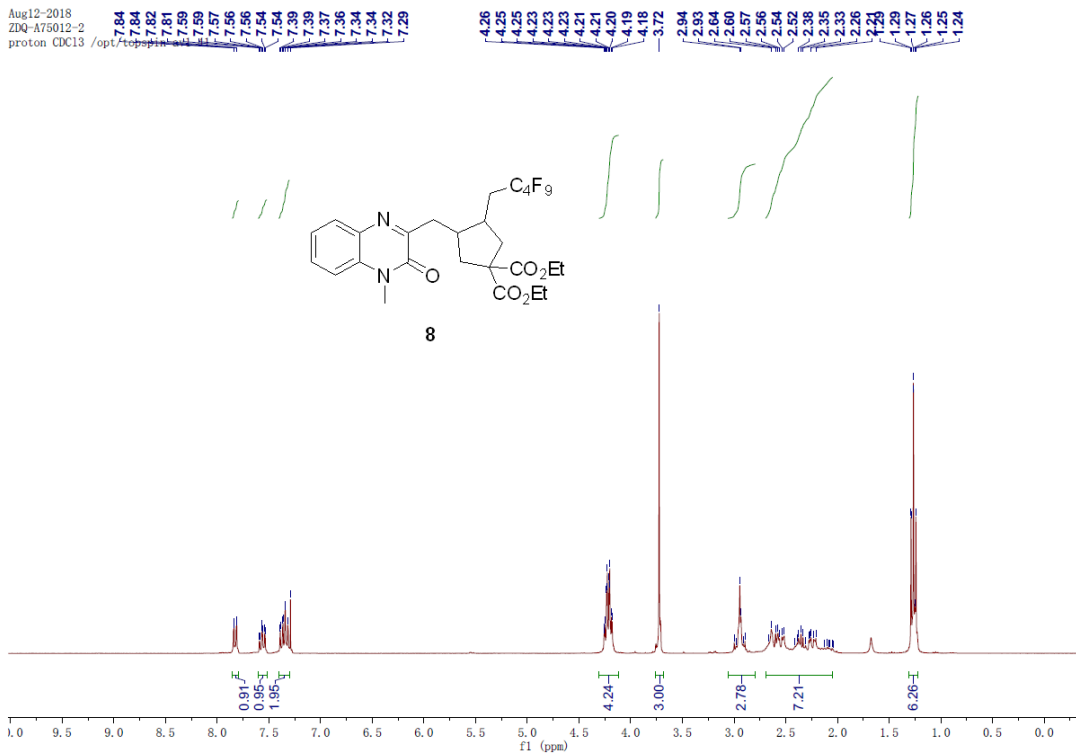

Aug12-2018  
ZDQ-A75012-2  
carbon CDCl3 /opt

177.42  
177.36  
170.46  
158.89  
154.83

133.07  
132.62  
129.85  
123.60  
113.55

61.62  
61.55  
58.71

39.61  
39.06  
38.67  
34.70  
33.48  
29.04

13.97

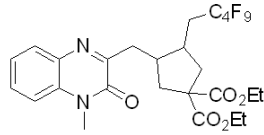

8

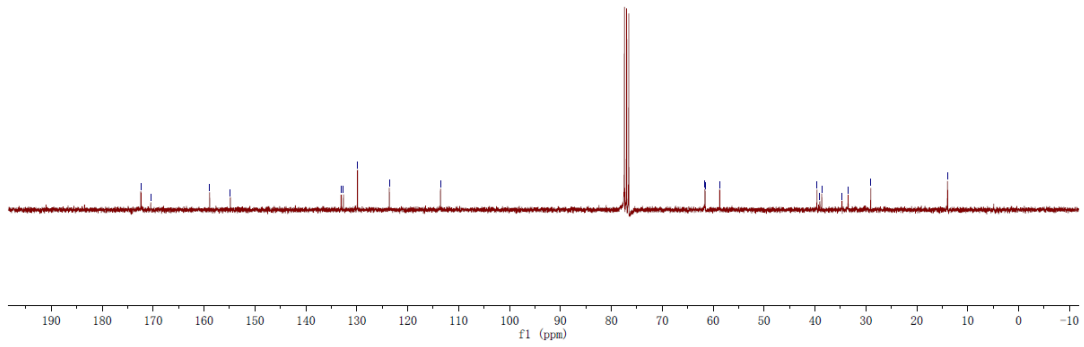

Aug11-2018  
zdg-a75012-02  
f19cpd CDCl3 /opt/topspin av1 8

81.00  
81.01  
81.03  
81.04  
81.05  
81.06  
81.07  
81.08  
81.09

111.62  
112.52  
112.57  
112.62  
114.01  
114.05  
114.10  
115.01  
124.33  
124.36  
125.80  
125.84  
125.86

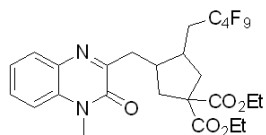

8

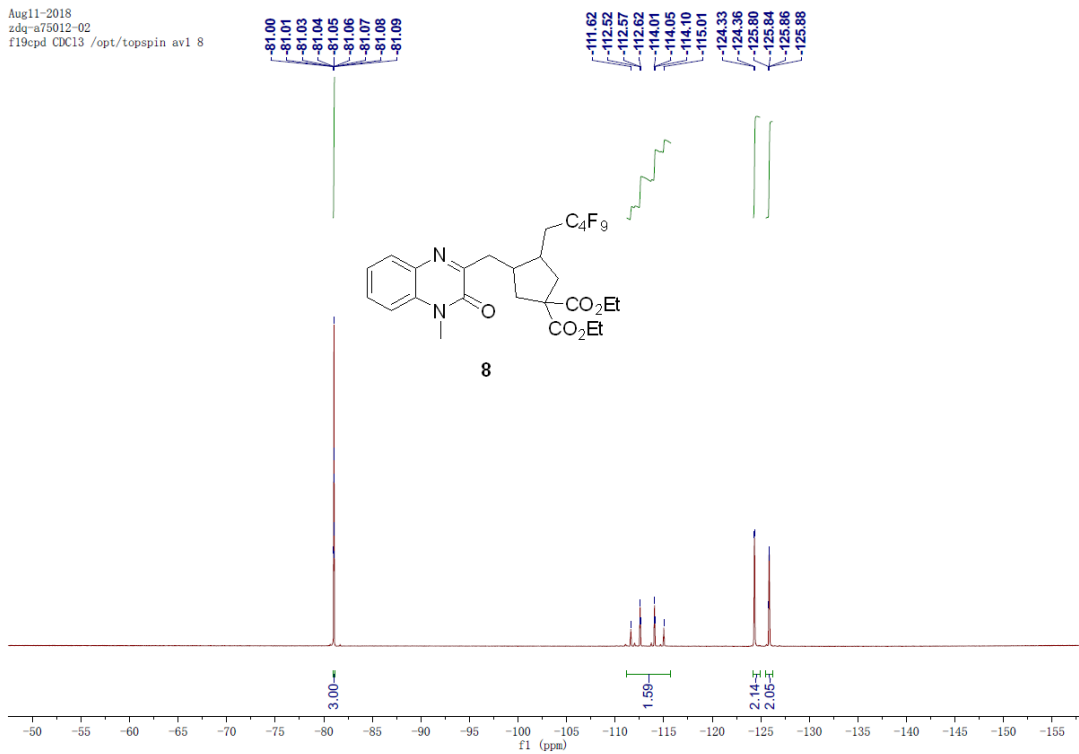

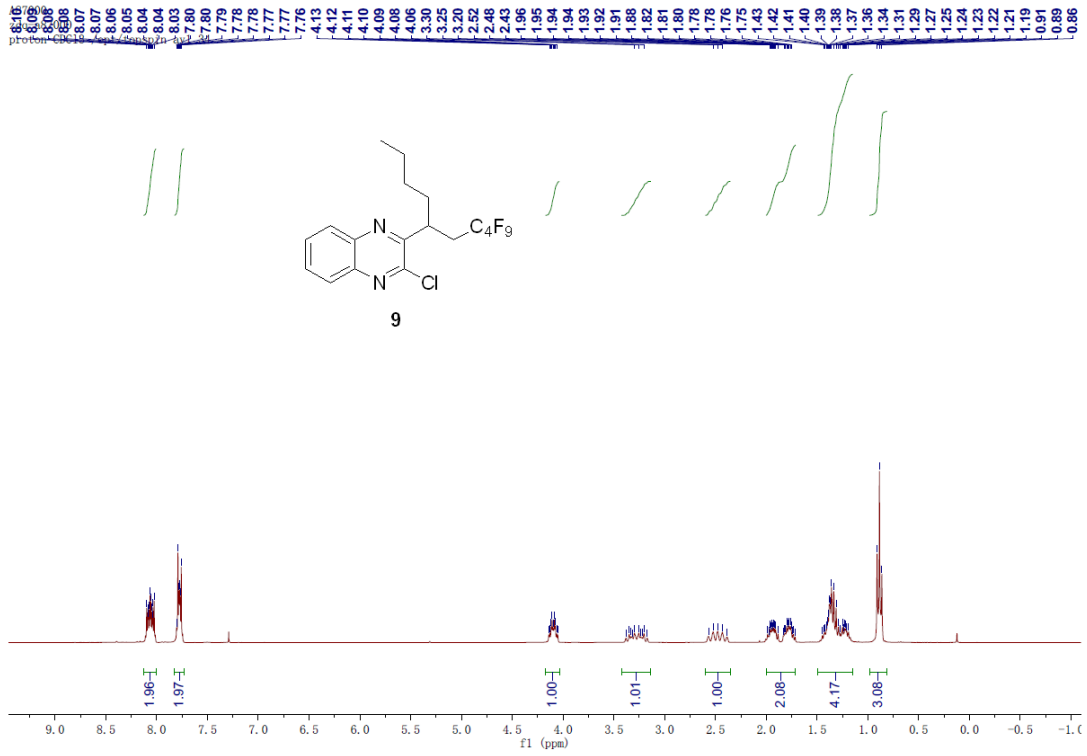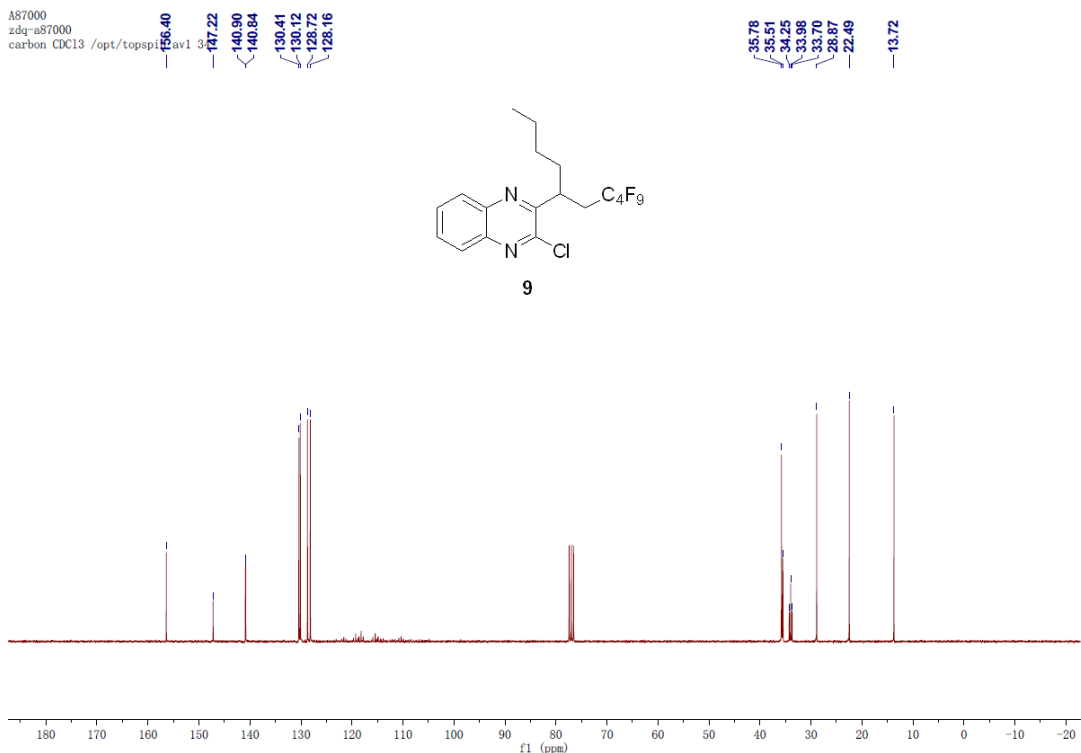

A87000  
zdq-a87000  
f19cpd CDC13 /opt/topspin av1 34

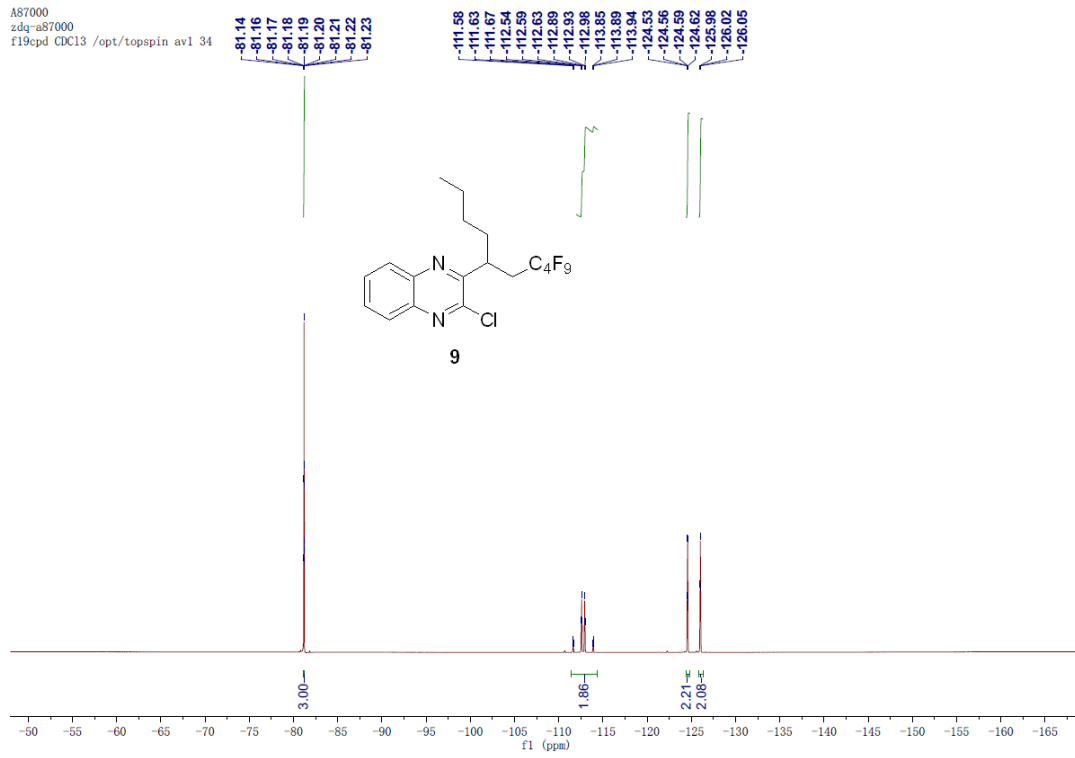

Supplement: ol8b03849_si_001.pdf [file ol8b03849_si_001.pdf]
